# Supplementary material for: Human postmeiotic sex chromatin and its impact on sex chromosome evolution
Source: HighWire-hosted journal article supplement (doi:10.1101/gr.135046.111), 2012-02-28
Supplement: Sin_tableS1.xlsx [file Sin_tableS1.xlsx]

## Sheet: GroupA
Table S1. Lists of each group of human X-linked genes based on the expression profiles
Probe Set ID	SG	PS	RS	Transcript ID(Array Design)	Target Description	Representative Public ID	Archival UniGene Cluster	UniGene ID	Location on X	Alignment	Gene Title	Gene Symbol
1554062_at	113.619	8.56573	9.29786	Hs2.38774.1	gb:AF380356.1 /DB_XREF=gi:15625395 /TID=Hs2.38774.1 /CNT=16 /FEA=FLmRNA /TIER=FL /STK=5 /LL=7499 /UG_GENE=XG /UG=Hs.38774 /DEF=Homo sapiens PBDX mRNA, complete cds. /PROD=PBDX /FL=gb:AF380356.1	AF380356	Hs.38774	Hs.179675	2670114	chrX:2670114-2733966 (+) // 97.29 // p22.33	Xg blood group	XG
215695_s_at	2034.23	19.5422	31.0852	Hs.58589.4	gb:U94357.1 /DB_XREF=gi:2618756 /GEN=glycogenin-2 /FEA=mRNA /CNT=4 /TID=Hs.58589.4 /TIER=ConsEnd /STK=0 /UG=Hs.58589 /LL=8908 /DEF=Homo sapiens glycogenin-2 delta (glycogenin-2) mRNA, partial cds. /PROD=glycogenin-2 delta	U94357	Hs.58589	Hs.567381	2746966	chrX:2746966-2800858 (+) // 98.18 // p22.33	glycogenin 2	GYG2
204060_s_at	234.973	38.2477	52.7099	g4826947	gb:NM_005044.1 /DB_XREF=gi:4826947 /GEN=PRKX /FEA=FLmRNA /CNT=80 /TID=Hs.147996.0 /TIER=FL+Stack /STK=33 /UG=Hs.147996 /LL=5613 /DEF=Homo sapiens protein kinase, X-linked (PRKX), mRNA. /PROD=protein kinase, X-linked /FL=gb:NM_005044.1	NM_005044	Hs.147996	Hs.721406	3522412	chrX:3522412-3631649 (-) // 82.9 // p22.33	protein kinase, X-linked /// protein kinase, Y-linked	PRKX /// PRKY
203974_at	196.925	62.9694	49.9208	g6912345	gb:NM_012080.1 /DB_XREF=gi:6912345 /GEN=DXF68S1E /FEA=FLmRNA /CNT=112 /TID=Hs.78991.0 /TIER=FL+Stack /STK=51 /UG=Hs.78991 /LL=8226 /DEF=Homo sapiens DNA segment, numerous copies, expressed probes (GS1 gene) (DXF68S1E), mRNA. /PROD=DNA segment, numerous copies, expressed probes(GS1 gene) /FL=gb:NM_012080.1 gb:M86934.1	NM_012080	Hs.78991	Hs.185910	6966915	chrX:6966915-7066147 (-) // 82.8 // p22.31	haloacid dehalogenase-like hydrolase domain containing 1	HDHD1
201868_s_at	133.148	29.0028	37.9139	Hs.76536.0	gb:AI082187 /DB_XREF=gi:3418979 /DB_XREF=ox75f01.x1 /CLONE=IMAGE:1662169 /FEA=FLmRNA /CNT=253 /TID=Hs.76536.0 /TIER=Stack /STK=8 /UG=Hs.76536 /LL=6907 /UG_GENE=TBL1 /UG_TITLE=transducin (beta)-like 1 /FL=gb:NM_005647.1	AI082187	Hs.76536	Hs.495656	9433038	chrX:9433038-9687778 (+) // 94.77 // p22.31	transducin (beta)-like 1X-linked	TBL1X
213401_s_at	153.102	4.96731	7.95961	Hs.76536.1	gb:AA724134 /DB_XREF=gi:2741841 /DB_XREF=ai07b03.s1 /CLONE=1342061 /FEA=EST /CNT=89 /TID=Hs.76536.1 /TIER=Stack /STK=17 /UG=Hs.76536 /LL=6907 /UG_GENE=TBL1 /UG_TITLE=transducin (beta)-like 1	AA724134	---	---	9686780	chrX:9686780-9687753 (-) // 98.35 // p22.2	---	---
210694_s_at	719.054	21.7305	12.1944	g3462508	gb:AF041209.1 /DB_XREF=gi:3462508 /GEN=MID1 /FEA=FLmRNA /CNT=3 /TID=Hs.27695.1 /TIER=FL /STK=0 /UG=Hs.27695 /LL=4281 /DEF=Homo sapiens midline 1 fetal kidney isoform 2 (MID1) mRNA, complete cds. /PROD=midline 1 fetal kidney isoform 2 /FL=gb:AF041209.1	AF041209	Hs.27695	Hs.27695	10416427	chrX:10416427-10851704 (-) // 89.74 // p22.2	midline 1 (Opitz/BBB syndrome)	MID1
203745_at	166.789	48.8594	14.7757	Hs.211571.0	gb:AI801013 /DB_XREF=gi:5366485 /DB_XREF=wg15d09.x1 /CLONE=IMAGE:2365169 /FEA=FLmRNA /CNT=83 /TID=Hs.211571.0 /TIER=Stack /STK=20 /UG=Hs.211571 /LL=3052 /UG_GENE=HCCS /UG_TITLE=holocytochrome c synthase (cytochrome c heme-lyase) /FL=gb:U36787.1 gb:NM_005333.1	AI801013	Hs.211571	Hs.211571	11129420	chrX:11129420-11141195 (+) // 97.29 // p22.2	holocytochrome c synthase	HCCS
207551_s_at	210.223	145.975	54.5822	g5803103	gb:NM_006800.1 /DB_XREF=gi:5803103 /GEN=MSL3L1 /FEA=FLmRNA /CNT=4 /TID=Hs.88764.0 /TIER=FL /STK=0 /UG=Hs.88764 /LL=10943 /DEF=Homo sapiens male-specific lethal-3 (Drosophila)-like 1 (MSL3L1), mRNA. /PROD=male-specific lethal-3 (Drosophila)-like 1 /FL=gb:NM_006800.1 gb:AF117065.1	NM_006800	Hs.88764	Hs.655288	11776277	chrX:11776277-11793870 (+) // 96.16 // p22.2	male-specific lethal 3 homolog (Drosophila)	MSL3
230352_at	185.161	13.9444	50.9194	Hs.2910.1	gb:AI392908 /DB_XREF=gi:4222455 /DB_XREF=tg10f07.x1 /CLONE=IMAGE:2108389 /FEA=EST /CNT=11 /TID=Hs.2910.1 /TIER=Stack /STK=10 /UG=Hs.2910 /LL=5634 /UG_GENE=PRPS2 /UG_TITLE=phosphoribosyl pyrophosphate synthetase 2	AI392908	Hs.2910	Hs.654581	12841451	chrX:12841451-12842108 (-) // 85.92 // p22.2	Phosphoribosyl pyrophosphate synthetase 2	PRPS2
221808_at	106.642	31.816	20.7191	Hs.28726.0	gb:NM_004251.1 /DB_XREF=gi:4759011 /GEN=RAB9 /FEA=FLmRNA /CNT=92 /TID=Hs.28726.0 /TIER=FL+Stack /STK=21 /UG=Hs.28726 /LL=9367 /DEF=Homo sapiens RAB9, member RAS oncogene family (RAB9), mRNA. /PROD=RAB9, member RAS oncogene family /FL=gb:U44103.1 gb:NM_004251.1	NM_004251	Hs.28726	Hs.495704	13707280	chrX:13707280-13727937 (+) // 86.52 // p22.2	RAB9A, member RAS oncogene family	RAB9A
209167_at	197.227	7.14366	9.407	Hs.5422.0	gb:AI419030 /DB_XREF=gi:4264961 /DB_XREF=tf53b01.x1 /CLONE=IMAGE:2102953 /FEA=FLmRNA /CNT=208 /TID=Hs.5422.0 /TIER=Stack /STK=8 /UG=Hs.5422 /LL=2824 /UG_GENE=GPM6B /UG_TITLE=glycoprotein M6B /FL=gb:AF016004.1	AI419030	Hs.5422	Hs.495710	13789041	chrX:13789041-13835178 (-) // 96.02 // p22.2	glycoprotein M6B	GPM6B
205673_s_at	361.258	79.0045	99.0434	g13443013	gb:NM_024087.1 /DB_XREF=gi:13443013 /GEN=DKFZP564L0862 /FEA=FLmRNA /CNT=38 /TID=Hs.19404.0 /TIER=FL+Stack /STK=21 /UG=Hs.19404 /LL=25954 /DEF=Homo sapiens DKFZP564L0862 protein (DKFZP564L0862), mRNA. /PROD=hypothetical protein FLJ20636 /FL=gb:NM_024087.1	NM_024087	Hs.19404	Hs.19404	15262110	chrX:15262110-15288183 (-) // 95.8 // p22.2	ankyrin repeat and SOCS box-containing 9	ASB9
205281_s_at	102.649	42.8766	12.4828	g11863129	gb:NM_002641.1 /DB_XREF=gi:11863129 /GEN=PIGA /FEA=FLmRNA /CNT=41 /TID=Hs.51.0 /TIER=FL+Stack /STK=20 /UG=Hs.51 /LL=5277 /DEF=Homo sapiens phosphatidylinositol glycan, class A (paroxysmal nocturnal hemoglobinuria) (PIGA), transcript variant 1, mRNA. /PROD=phosphatidylinositol glycan, class A isoform 1 /FL=gb:D11466.1 gb:NM_002641.1	NM_002641	Hs.51	Hs.137154	15337579	chrX:15337579-15350115 (-) // 99.33 // p22.2	phosphatidylinositol glycan anchor biosynthesis, class A	PIGA
219962_at	230.539	17.2186	46.3371	g11225608	gb:NM_021804.1 /DB_XREF=gi:11225608 /GEN=ACE2 /FEA=FLmRNA /CNT=27 /TID=Hs.178098.0 /TIER=FL+Stack /STK=12 /UG=Hs.178098 /LL=59272 /DEF=Homo sapiens angiotensin I converting enzyme (peptidyl-dipeptidase A) 2 (ACE2), mRNA. /PROD=angiotensin I converting enzyme(peptidyl-dipeptidase A) 2 /FL=gb:NM_021804.1 gb:AF241254.1 gb:AB046569.1 gb:AF291820.1	NM_021804	Hs.178098	Hs.178098	15579155	chrX:15579155-15619137 (-) // 98.09 // p22.2	angiotensin I converting enzyme (peptidyl-dipeptidase A) 2	ACE2
238435_at	108.163	9.0221	9.31819	Hs.219441.0	gb:AA521288 /DB_XREF=gi:2261831 /DB_XREF=aa79e01.s1 /CLONE=IMAGE:827160 /FEA=EST /CNT=12 /TID=Hs.219441.0 /TIER=ConsEnd /STK=1 /UG=Hs.219441 /UG_TITLE=ESTs, Highly similar to CA5B_HUMAN CARBONIC ANHYDRASE VB, MITOCHONDRIAL PRECURSOR (H.sapiens)	AA521288	Hs.219441	---	15706781	chrX:15706781-15716583 (+) // 78.45 // p22.2	hypothetical LOC100506661	LOC100506661
213876_x_at	187.926	54.5812	37.8961	Hs.171909.1	gb:AW089584 /DB_XREF=gi:6046928 /DB_XREF=xd20f04.x1 /CLONE=IMAGE:2594335 /FEA=EST /CNT=19 /TID=Hs.171909.1 /TIER=Stack /STK=9 /UG=Hs.171909 /LL=8233 /UG_GENE=U2AF1RS2 /UG_TITLE=U2 small nuclear ribonucleoprotein auxiliary factor, small subunit 2	AW089584	Hs.171909	Hs.171909	15808634	chrX:15808634-15841380 (+) // 85.13 // p22.2	zinc finger (CCCH type), RNA-binding motif and serine/arginine rich 2	ZRSR2
228415_at	552.772	198.821	118.237	Hs.40368.2	gb:AA205444 /DB_XREF=gi:1803434 /DB_XREF=zq66c06.s1 /CLONE=IMAGE:646570 /FEA=EST /CNT=27 /TID=Hs.40368.2 /TIER=Stack /STK=21 /UG=Hs.40368 /LL=8905 /UG_GENE=AP1S2 /UG_TITLE=adaptor-related protein complex 1, sigma 2 subunit	AA205444	Hs.40368	Hs.653504	15848181	chrX:15848181-15848656 (-) // 82.9 // p22.2	adaptor-related protein complex 1, sigma 2 subunit	AP1S2
227520_at	317.213	44.9326	11.0612	Hs.31314.1	gb:AI885312 /DB_XREF=gi:5590476 /DB_XREF=wl92c03.x1 /CLONE=IMAGE:2432356 /FEA=EST /CNT=30 /TID=Hs.31314.1 /TIER=Stack /STK=29 /UG=Hs.31314 /LL=5931 /UG_GENE=RBBP7 /UG_TITLE=retinoblastoma-binding protein 7	AI885312	Hs.31314	Hs.555961	16862028	chrX:16862028-16862640 (+) // 89.35 // p22.2	taxilin gamma	TXLNG
201092_at	1279.75	592.477	631.168	g13259504	gb:NM_002893.2 /DB_XREF=gi:13259504 /GEN=RBBP7 /FEA=FLmRNA /CNT=375 /TID=Hs.31314.0 /TIER=FL+Stack /STK=169 /UG=Hs.31314 /LL=5931 /DEF=Homo sapiens retinoblastoma-binding protein 7 (RBBP7), mRNA. /PROD=retinoblastoma-binding protein 7 /FL=gb:U35143.1 gb:NM_002893.2	NM_002893	Hs.31314	Hs.495755	16862776	chrX:16862776-16888457 (-) // 99.69 // p22.2	retinoblastoma binding protein 7	RBBP7
219440_at	105.489	14.2862	18.8081	g12056469	gb:NM_021785.2 /DB_XREF=gi:12056469 /GEN=RAI2 /FEA=FLmRNA /CNT=39 /TID=Hs.49597.0 /TIER=FL+Stack /STK=19 /UG=Hs.49597 /LL=10742 /DEF=Homo sapiens retinoic acid induced 2 (RAI2), mRNA. /PROD=retinoic acid induced 2 /FL=gb:NM_021785.2	NM_021785	Hs.49597	Hs.446680	17818170	chrX:17818170-17820507 (-) // 99.91 // p22.13	retinoic acid induced 2	RAI2
1553842_at	231.453	121.012	23.5613	Hs2.403802.1	gb:NM_153346.1 /DB_XREF=gi:23503280 /TID=Hs2.403802.1 /CNT=5 /FEA=FLmRNA /TIER=FL /STK=0 /LL=139105 /UG_GENE=MGC33653 /UG=Hs.403802 /UG_TITLE=hypothetical protein MGC33653 /DEF=Homo sapiens hypothetical protein MGC33653 (MGC33653), mRNA. /FL=gb:NM_153346.1 gb:BC037301.1	NM_153346	Hs.403802	Hs.403802	18181052	chrX:18181052-18238999 (-) // 80.55 // p22.13	BEN domain containing 2	BEND2
206002_at	158.666	18.4651	13.7652	g5031732	gb:NM_005756.1 /DB_XREF=gi:5031732 /GEN=GPR64 /FEA=FLmRNA /CNT=24 /TID=Hs.184942.0 /TIER=FL+Stack /STK=9 /UG=Hs.184942 /LL=10149 /DEF=Homo sapiens G protein-coupled receptor 64 (GPR64), mRNA. /PROD=G protein-coupled receptor 64 /FL=gb:NM_005756.1	NM_005756	Hs.184942	Hs.146978	19007431	chrX:19007431-19100867 (-) // 95.86 // p22.13	G protein-coupled receptor 64	GPR64
1555864_s_at	1112.37	62.3562	31.2863	Hs2.423329.1	gb:AW057819 /DB_XREF=gi:5933458 /DB_XREF=wx04d03.x1 /CLONE=IMAGE:2542661 /TID=Hs2.423329.1 /CNT=22 /FEA=mRNA /TIER=Stack /STK=15 /UG=Hs.423329 /UG_TITLE=Pyruvate dehydrogenase alpha subunit {3region} (human, mRNA Partial Mutant, 129 nt)	AW057819	Hs.423329	Hs.530331	19377078	chrX:19377078-19377973 (+) // 96.85 // p22.12	pyruvate dehydrogenase (lipoamide) alpha 1	PDHA1
223082_at	130.556	45.6562	19.434	g7188748	gb:AF230904.1 /DB_XREF=gi:7188748 /GEN=CIN85 /FEA=FLmRNA /CNT=137 /TID=Hs.153260.0 /TIER=FL /STK=0 /UG=Hs.153260 /DEF=Homo sapiens c-Cbl-interacting protein (CIN85) mRNA, complete cds. /PROD=c-Cbl-interacting protein /FL=gb:AF230904.1	AF230904	Hs.153260	Hs.444770	19553519	chrX:19553519-19905719 (-) // 96.0 // p22.12	SH3-domain kinase binding protein 1	SH3KBP1
228262_at	299.167	83.7039	19.8905	Hs.129135.0	gb:AW237462 /DB_XREF=gi:6569851 /DB_XREF=xm72c03.x1 /CLONE=IMAGE:2689732 /FEA=EST /CNT=30 /TID=Hs.129135.0 /TIER=Stack /STK=12 /UG=Hs.129135 /UG_TITLE=ESTs	AW237462	Hs.129135	Hs.127951	20024984	chrX:20024984-20026268 (-) // 97.49 // p22.12	MAP7 domain containing 2	MAP7D2
203843_at	141.761	37.629	17.7975	Hs.173965.0	gb:AA906056 /DB_XREF=gi:3041179 /DB_XREF=oj90d06.s1 /CLONE=IMAGE:1505579 /FEA=FLmRNA /CNT=79 /TID=Hs.173965.0 /TIER=Stack /STK=14 /UG=Hs.173965 /LL=6197 /UG_GENE=RPS6KA3 /UG_TITLE=ribosomal protein S6 kinase, 90kD, polypeptide 3 /FL=gb:U08316.1 gb:NM_004586.1	AA906056	Hs.173965	Hs.445387	20171751	chrX:20171751-20284750 (-) // 92.45 // p22.12	ribosomal protein S6 kinase, 90kDa, polypeptide 3	RPS6KA3
239229_at	111.068	5.54875	4.74256	Hs.50125.0	gb:AI342246 /DB_XREF=gi:4079173 /DB_XREF=qt26g09.x1 /CLONE=IMAGE:1949152 /FEA=EST /CNT=5 /TID=Hs.50125.0 /TIER=ConsEnd /STK=4 /UG=Hs.50125 /UG_TITLE=ESTs	AI342246	Hs.50125	Hs.495834	22268435	chrX:22268435-22269424 (+) // 98.5 // p22.11	phosphate regulating endopeptidase homolog, X-linked	PHEX
221641_s_at	356.517	29.0585	37.3911	g12005490	gb:AF241787.1 /DB_XREF=gi:12005490 /FEA=FLmRNA /CNT=5 /TID=Hs.18625.1 /TIER=FL /STK=0 /UG=Hs.18625 /LL=23597 /UG_GENE=MT-ACT48 /DEF=Homo sapiens CGI16-iso mRNA, complete cds. /PROD=CGI16-iso /FL=gb:AF241787.1	AF241787	Hs.18625	Hs.298885	23721793	chrX:23721793-23725124 (-) // 81.16 // p22.11	acyl-CoA thioesterase 9	ACOT9
226370_at	969.519	287.646	176.207	Hs.61603.0	gb:BG149487 /DB_XREF=gi:12661517 /DB_XREF=nad29d08.x1 /CLONE=IMAGE:3366951 /FEA=mRNA /CNT=42 /TID=Hs.61603.0 /TIER=Stack /STK=17 /UG=Hs.61603 /LL=80311 /UG_GENE=KIAA1677 /UG_TITLE=KIAA1677	BG149487	Hs.61603	Hs.495854	24001834	chrX:24001834-24024563 (-) // 97.73 // p22.11	kelch-like 15 (Drosophila)	KLHL15
224935_at	1025.18	28.2618	48.1953	Hs.30376.1	gb:BG165815 /DB_XREF=gi:12672518 /DB_XREF=602344486F1 /CLONE=IMAGE:4454565 /FEA=EST /CNT=118 /TID=Hs.30376.1 /TIER=Stack /STK=37 /UG=Hs.30376 /LL=51522 /UG_GENE=HSPC194 /UG_TITLE=hypothetical protein	BG165815	Hs.30376	Hs.539684	24095045	chrX:24095045-24097111 (+) // 62.91 // p22.11	eukaryotic translation initiation factor 2, subunit 3 gamma, 52kDa	EIF2S3
229022_at	199.885	15.9693	21.3224	Hs.53455.0	gb:AI745209 /DB_XREF=gi:5113497 /DB_XREF=wg10c07.x1 /CLONE=IMAGE:2364684 /FEA=EST /CNT=23 /TID=Hs.53455.0 /TIER=Stack /STK=17 /UG=Hs.53455 /UG_TITLE=ESTs	AI745209	Hs.53455	Hs.336681	24232838	chrX:24232838-24234206 (+) // 83.38 // p22.11	zinc finger protein, X-linked	ZFX
221957_at	169.661	68.7364	89.7263	Hs.193124.2	gb:BF939522 /DB_XREF=gi:12356842 /DB_XREF=nac77g06.x1 /CLONE=IMAGE:3440458 /FEA=EST /CNT=36 /TID=Hs.193124.2 /TIER=Stack /STK=19 /UG=Hs.193124 /LL=5165 /UG_GENE=PDK3 /UG_TITLE=pyruvate dehydrogenase kinase, isoenzyme 3	BF939522	Hs.193124	Hs.296031	24549808	chrX:24549808-24558207 (+) // 95.42 // p22.11	pyruvate dehydrogenase kinase, isozyme 3	PDK3
204835_at	259.663	27.0082	15.0311	g8393994	gb:NM_016937.1 /DB_XREF=gi:8393994 /GEN=POLA /FEA=FLmRNA /CNT=39 /TID=Hs.267289.0 /TIER=FL+Stack /STK=13 /UG=Hs.267289 /LL=5422 /DEF=Homo sapiens polymerase (DNA directed), alpha (POLA), mRNA. /PROD=polymerase (DNA-directed), alpha /FL=gb:NM_016937.1	NM_016937	Hs.267289	Hs.567319	24712063	chrX:24712063-25015100 (+) // 98.97 // p22.11	polymerase (DNA directed), alpha 1, catalytic subunit	POLA1
1552858_at	226.253	4.52904	3.71057	Hs2.376011.1	gb:NM_173523.1 /DB_XREF=gi:27734966 /TID=Hs2.376011.1 /CNT=4 /FEA=FLmRNA /TIER=FL /STK=2 /LL=158809 /UG_GENE=FLJ40242 /UG=Hs.376011 /UG_TITLE=hypothetical protein FLJ40242 /DEF=Homo sapiens hypothetical protein FLJ40242 (FLJ40242), mRNA. /FL=gb:NM_173523.1	NM_173523	Hs.376011	Hs.376011	26210556	chrX:26210556-26213762 (+) // 99.29 // p21.3	melanoma antigen family B, 6	MAGEB6
206218_at	1172.42	290.355	56.8726	g4505080	gb:NM_002364.1 /DB_XREF=gi:4505080 /GEN=MAGEB2 /FEA=FLmRNA /CNT=28 /TID=Hs.113824.0 /TIER=FL /STK=6 /UG=Hs.113824 /LL=4113 /DEF=Homo sapiens melanoma antigen, family B, 2 (MAGEB2), mRNA. /PROD=melanoma antigen, family B, 2 /FL=gb:NM_002364.1 gb:AF015766.1	NM_002364	Hs.113824	Hs.113824	30233673	chrX:30233673-30238206 (+) // 99.94 // p21.2	melanoma antigen family B, 2	MAGEB2
207534_at	330.611	32.0633	47.4455	g4505078	gb:NM_002363.1 /DB_XREF=gi:4505078 /GEN=MAGEB1 /FEA=FLmRNA /CNT=6 /TID=Hs.73021.0 /TIER=FL /STK=0 /UG=Hs.73021 /LL=4112 /DEF=Homo sapiens melanoma antigen, family B, 1 (MAGEB1), mRNA. /PROD=melanoma antigen, family B, 1 /FL=gb:NM_002363.1	NM_002363	Hs.73021	Hs.725047	30261847	chrX:30261847-30270152 (+) // 98.44 // p21.2	melanoma antigen family B, 1	MAGEB1
208086_s_at	421.909	26.2546	36.7455	g181598	gb:M92650.1 /DB_XREF=gi:181598 /GEN=DMD /FEA=FLmRNA /CNT=2 /TID=Hs.169470.16 /TIER=FL /STK=0 /UG=Hs.169470 /LL=1756 /UG_TITLE=dystrophin (muscular dystrophy, Duchenne and Becker types), includes DXS142, DXS164, DXS206, DXS230, DXS239, DXS268, DXS269, DXS270, DXS272 /DEF=Human Duchenne muscular dystrophy (DMD) mRNA, complete cds. /FL=gb:NM_004018.1 gb:M92650.1	M92650	Hs.169470	Hs.495912	31139760	chrX:31139760-31284998 (-) // 100.0 // p21.2	dystrophin	DMD
209655_s_at	123.751	9.87062	8.20127	Hs.8769.0	gb:AI803181 /DB_XREF=gi:5368653 /DB_XREF=tc15a07.x1 /CLONE=IMAGE:2063892 /FEA=FLmRNA /CNT=92 /TID=Hs.8769.0 /TIER=Stack /STK=13 /UG=Hs.8769 /UG_TITLE=Homo sapiens mRNA; cDNA DKFZp761J17121 (from clone DKFZp761J17121); complete cds /FL=gb:AL136550.1	AI803181	Hs.8769	Hs.8769	34645192	chrX:34645192-34675401 (-) // 94.12 // p21.1	transmembrane protein 47	TMEM47
205618_at	132.704	7.3806	6.93235	g4506134	gb:NM_000950.1 /DB_XREF=gi:4506134 /GEN=PRRG1 /FEA=FLmRNA /CNT=48 /TID=Hs.40637.0 /TIER=FL+Stack /STK=19 /UG=Hs.40637 /LL=5638 /DEF=Homo sapiens proline-rich Gla (G-carboxyglutamic acid) polypeptide 1 (PRRG1), mRNA. /PROD=proline-rich Gla (G-carboxyglutamic acid)polypeptide 1 /FL=gb:AF009242.1 gb:NM_000950.1	NM_000950	Hs.40637	Hs.190341	37245851	chrX:37245851-37316542 (+) // 81.69 // p21.1	proline rich Gla (G-carboxyglutamic acid) 1	PRRG1
207624_s_at	714.427	133.302	49.3661	g4506580	gb:NM_000328.1 /DB_XREF=gi:4506580 /GEN=RPGR /FEA=FLmRNA /CNT=4 /TID=Hs.153614.0 /TIER=FL /STK=0 /UG=Hs.153614 /LL=6103 /DEF=Homo sapiens retinitis pigmentosa GTPase regulator (RPGR), mRNA. /PROD=retinitis pigmentosa GTPase regulator /FL=gb:U57629.1 gb:NM_000328.1	NM_000328	Hs.153614	Hs.61438	38128605	chrX:38128605-38186679 (-) // 95.37 // p11.4	retinitis pigmentosa GTPase regulator	RPGR
219433_at	410.525	14.2198	5.83455	g8923266	gb:NM_017745.1 /DB_XREF=gi:8923266 /GEN=FLJ20285 /FEA=FLmRNA /CNT=33 /TID=Hs.278732.0 /TIER=FL+Stack /STK=19 /UG=Hs.278732 /LL=54880 /DEF=Homo sapiens hypothetical protein FLJ20285 (FLJ20285), mRNA. /PROD=hypothetical protein FLJ20285 /FL=gb:NM_017745.1	NM_017745	Hs.278732	Hs.659681	39910507	chrX:39910507-39922190 (-) // 99.05 // p11.4	BCL6 corepressor	BCOR
228700_at	358.08	11.1796	9.0729	Hs.175652.0	gb:AA063608 /DB_XREF=gi:1557575 /DB_XREF=ze87e08.s1 /CLONE=IMAGE:365990 /FEA=mRNA /CNT=18 /TID=Hs.175652.0 /TIER=Stack /STK=11 /UG=Hs.175652 /UG_TITLE=Homo sapiens cDNA FLJ11567 fis, clone HEMBA1003276	AA063608	Hs.175652	Hs.495961	40486174	chrX:40486174-40487523 (-) // 59.53 // p11.4	chromosome X open reading frame 38	CXorf38
217120_s_at	175.4	12.5065	13.7265	Hs.21586.1	gb:AK023368.1 /DB_XREF=gi:10435273 /FEA=mRNA /CNT=1 /TID=Hs.21586.1 /TIER=ConsEnd /STK=0 /UG=Hs.21586 /LL=9282 /UG_GENE=CRSP2 /UG_TITLE=cofactor required for Sp1 transcriptional activation, subunit 2 (150kD) /DEF=Homo sapiens cDNA FLJ13306 fis, clone OVARC1001417, highly similar to Homo sapiens thyroid hormone receptor-associated protein complex component TRAP170 mRNA.	AK023368	Hs.21586	Hs.407604	40510530	chrX:40510530-40551505 (+) // 96.48 // p11.4	mediator complex subunit 14	MED14
201099_at	1727.58	143.314	45.1397	Hs.77578.0	gb:AA824386 /DB_XREF=gi:2896270 /DB_XREF=aj29c05.s1 /CLONE=1391720 /FEA=FLmRNA /CNT=292 /TID=Hs.77578.0 /TIER=Stack /STK=17 /UG=Hs.77578 /LL=8239 /UG_GENE=USP9X /UG_TITLE=ubiquitin specific protease 9, X chromosome (Drosophila fat facets related) /FL=gb:NM_004652.2	AA824386	Hs.77578	Hs.77578	40982822	chrX:40982822-41093664 (+) // 98.47 // p11.4	ubiquitin specific peptidase 9, X-linked	USP9X
201210_at	2884.24	519.621	199.591	g13514812	gb:NM_001356.2 /DB_XREF=gi:13514812 /GEN=DDX3 /FEA=FLmRNA /CNT=278 /TID=Hs.147916.0 /TIER=FL+Stack /STK=107 /UG=Hs.147916 /LL=1654 /DEF=Homo sapiens DEADH (Asp-Glu-Ala-AspHis) box polypeptide 3 (DDX3), transcript variant 2, mRNA. /PROD=DEADH (Asp-Glu-Ala-AspHis) box polypeptide 3 /FL=gb:U50553.1 gb:NM_001356.2 gb:AF000982.1 gb:AF061337.1	NM_001356	Hs.147916	Hs.380774	41192650	chrX:41192650-41209441 (+) // 95.77 // p11.4	DEAD (Asp-Glu-Ala-Asp) box polypeptide 3, X-linked	DDX3X
238699_s_at	553.479	13.8894	11.3186	Hs.195738.0	gb:AI659225 /DB_XREF=gi:4762795 /DB_XREF=tu02h02.x1 /CLONE=IMAGE:2249907 /FEA=EST /CNT=8 /TID=Hs.195738.0 /TIER=ConsEnd /STK=0 /UG=Hs.195738 /UG_TITLE=ESTs, Highly similar to CSKP_HUMAN PERIPHERAL PLASMA MEMBRANE PROTEIN CASK (H.sapiens)	AI659225	Hs.195738	Hs.495984	41519287	chrX:41519287-41524563 (-) // 91.8 // p11.4	calcium/calmodulin-dependent serine protein kinase (MAGUK family)	CASK
235346_at	305.674	64.9431	44.1863	Hs.7549.0	gb:BF033615 /DB_XREF=gi:10741327 /DB_XREF=601453906F1 /CLONE=IMAGE:3857785 /FEA=EST /CNT=12 /TID=Hs.7549.0 /TIER=ConsEnd /STK=0 /UG=Hs.7549 /UG_TITLE=ESTs	BF033615	Hs.7549	Hs.7549	44382885	chrX:44382885-44386614 (-) // 99.74 // p11.3	FUN14 domain containing 1	FUNDC1
226550_at	148.696	12.9545	8.68111	Hs.91389.0	gb:AI672159 /DB_XREF=gi:4851890 /DB_XREF=wa04c04.x1 /CLONE=IMAGE:2297094 /FEA=EST /CNT=64 /TID=Hs.91389.0 /TIER=Stack /STK=21 /UG=Hs.91389 /UG_TITLE=ESTs	AI672159	Hs.91389	Hs.91389	46458686	chrX:46458686-46461495 (-) // 95.81 // p11.23	---	---
204866_at	679.366	194.98	36.8874	g7662005	gb:NM_014735.1 /DB_XREF=gi:7662005 /GEN=KIAA0215 /FEA=FLmRNA /CNT=60 /TID=Hs.82292.0 /TIER=FL+Stack /STK=31 /UG=Hs.82292 /LL=9767 /DEF=Homo sapiens KIAA0215 gene product (KIAA0215), mRNA. /PROD=KIAA0215 gene product /FL=gb:D86969.1 gb:NM_014735.1	NM_014735	Hs.82292	Hs.371977	46771867	chrX:46771867-46920640 (+) // 96.92 // p11.23	PHD finger protein 16	PHF16
215207_x_at	115.721	23.8856	7.79054	Hs.301917.0	gb:BF695847 /DB_XREF=gi:11981255 /DB_XREF=601852205F1 /CLONE=IMAGE:4076232 /FEA=mRNA /CNT=5 /TID=Hs.301917.0 /TIER=ConsEnd /STK=0 /UG=Hs.301917 /LL=11049 /UG_GENE=YDD19 /UG_TITLE=YDD19 protein	BF695847	Hs.301917	Hs.289008	47371263	chrX:47371263-47372372 (-) // 90.56 // p11.23	nuclear undecaprenyl pyrophosphate synthase 1 homolog (S. cerevisiae) /// nuclear undecaprenyl pyrophosphate synthase 1 homolog (S. cerevisiae) pseudogene 3	NUS1 /// NUS1P3
202735_at	898.204	104.827	164.385	g5729809	gb:NM_006579.1 /DB_XREF=gi:5729809 /GEN=EBP /FEA=FLmRNA /CNT=125 /TID=Hs.75105.0 /TIER=FL+Stack /STK=45 /UG=Hs.75105 /LL=10682 /DEF=Homo sapiens emopamil-binding protein (sterol isomerase) (EBP), mRNA. /PROD=emopamil-binding protein (sterol isomerase) /FL=gb:NM_006579.1	NM_006579	Hs.75105	Hs.30619	48380256	chrX:48380256-48387102 (+) // 95.99 // p11.23	emopamil binding protein (sterol isomerase)	EBP
208319_s_at	1030.07	178.113	102.464	g5803136	gb:NM_006743.1 /DB_XREF=gi:5803136 /GEN=RBM3 /FEA=FLmRNA /CNT=2 /TID=Hs.301404.0 /TIER=FL /STK=0 /UG=Hs.301404 /LL=5935 /DEF=Homo sapiens RNA binding motif protein 3 (RBM3), mRNA. /PROD=RNA binding motif protein 3 /FL=gb:NM_006743.1 gb:U28686.1	NM_006743	Hs.301404	Hs.301404	48432899	chrX:48432899-48436576 (+) // 69.67 // p11.23	RNA binding motif (RNP1, RRM) protein 3	RBM3
207769_s_at	160.842	98.751	94.8684	g5031956	gb:NM_005710.1 /DB_XREF=gi:5031956 /GEN=PQBP1 /FEA=FLmRNA /CNT=4 /TID=Hs.30570.0 /TIER=FL /STK=0 /UG=Hs.30570 /LL=10084 /DEF=Homo sapiens polyglutamine binding protein 1 (PQBP1), mRNA. /PROD=polyglutamine binding protein 1 /FL=gb:NM_005710.1 gb:AJ005893.1	NM_005710	Hs.30570	Hs.534384	48755535	chrX:48755535-48760419 (+) // 100.0 // p11.23	polyglutamine binding protein 1	PQBP1
209326_at	104.22	49.2273	19.4601	g1526437	gb:D84454.1 /DB_XREF=gi:1526437 /FEA=FLmRNA /CNT=127 /TID=Hs.21899.1 /TIER=FL+Stack /STK=62 /UG=Hs.21899 /LL=7355 /UG_GENE=SLC35A2 /DEF=Human mRNA for UDP-galactose translocator, complete cds. /PROD=UDP-galactose translocator /FL=gb:D84454.1	D84454	Hs.21899	Hs.21899	48760888	chrX:48760888-48769235 (-) // 96.6 // p11.23	solute carrier family 35 (UDP-galactose transporter), member A2	SLC35A2
203776_at	194.203	44.4921	30.0389	g7662668	gb:NM_015698.1 /DB_XREF=gi:7662668 /GEN=T54 /FEA=FLmRNA /CNT=114 /TID=Hs.100391.0 /TIER=FL+Stack /STK=17 /UG=Hs.100391 /LL=27238 /DEF=Homo sapiens T54 protein (T54), mRNA. /PROD=T54 protein /FL=gb:BC000397.1 gb:U66359.1 gb:NM_015698.1 gb:BC003148.1	NM_015698	Hs.100391	Hs.503666	48970338	chrX:48970338-48980132 (-) // 98.31 // p11.23	G patch domain and KOW motifs	GPKOW
229365_at	146.379	20.6398	22.4597	Hs.227583.0	gb:BF475372 /DB_XREF=gi:11546199 /DB_XREF=naa17g04.x1 /CLONE=IMAGE:3255342 /FEA=EST /CNT=19 /TID=Hs.227583.0 /TIER=Stack /STK=17 /UG=Hs.227583 /UG_TITLE=Homo sapiens chromosome X map Xp11.23 L-type calcium channel alpha-1 subunit (CACNA1F) gene, complete cds; HSP27 pseudogene, complete sequence; and JM1 protein, JM2 protein, and Hb2E genes, complete cds	BF475372	Hs.227583	Hs.433652	49143028	chrX:49143028-49143980 (+) // 96.15 // p11.23	protein phosphatase 1, regulatory (inhibitor) subunit 3F	PPP1R3F
207663_x_at	1693.81	1215.52	354.134	g4503880	gb:NM_001473.1 /DB_XREF=gi:4503880 /GEN=GAGE3 /FEA=FLmRNA /CNT=3 /TID=Hs.176661.0 /TIER=FL /STK=1 /UG=Hs.176661 /LL=2575 /DEF=Homo sapiens G antigen 3 (GAGE3), mRNA. /PROD=G antigen 3 /FL=gb:U19144.1 gb:NM_001473.1	NM_001473	Hs.176661	---	49161338	chrX:49161338-49223941 (+) // 76.99 // p11.23	G antigen 3	GAGE3
208283_at	100.496	32.5177	11.048	g4503876	gb:NM_001468.1 /DB_XREF=gi:4503876 /GEN=GAGE1 /FEA=FLmRNA /CNT=2 /TID=Hs.176660.0 /TIER=FL /STK=0 /UG=Hs.176660 /LL=2543 /DEF=Homo sapiens G antigen 1 (GAGE1), mRNA. /PROD=G antigen 1 /FL=gb:U19142.1 gb:NM_001468.1	NM_001468	Hs.176660	Hs.632815	49354166	chrX:49354166-49370710 (+) // 86.07 // p11.23 /// chrX:49197630-49204921 (+) // 85.76 // p11.23 /// chrX:49207183-49214418 (+) // 85.6 // p11.23 /// chrX:49226205-49233479 (+) // 85.45 // p11.23 /// chrX:49188127-49195367 (+) // 85.6 // p11.23 /// chrX:49235742-49294586 (+) // 85.45 // p11.23 /// chrX:49178583-49185864 (+) // 85.14 // p11.23 /// chrX:49216682-49223941 (+) // 84.83 // p11.23 /// c…	G antigen 1	GAGE1
220057_at	2806.81	703.127	488.265	g9966898	gb:NM_020411.1 /DB_XREF=gi:9966898 /GEN=XAGE-1 /FEA=FLmRNA /CNT=22 /TID=Hs.112208.0 /TIER=FL /STK=7 /UG=Hs.112208 /LL=57131 /DEF=Homo sapiens XAGE-1 protein (XAGE-1), mRNA. /PROD=XAGE-1 protein /FL=gb:NM_020411.1 gb:AF251237.1	NM_020411	Hs.112208	Hs.546096	52238817	chrX:52238817-52243951 (+) // 88.98 // p11.22 /// chrX:52511768-52516902 (+) // 88.98 // p11.22 /// chrX:52255221-52260355 (-) // 88.98 // p11.22 /// chrX:52528161-52533295 (-) // 88.98 // p11.22 /// chrX:52541055-52546189 (-) // 88.98 // p11.22	X antigen family, member 1A /// X antigen family, member 1B /// X antigen family, member 1C /// X antigen family, member 1D /// X antigen family, member 1E	XAGE1A /// XAGE1B /// XAGE1C /// XAGE1D /// XAGE1E
216462_at	1194.52	5.47773	4.78821	Hs.289105.5	gb:X79200.1 /DB_XREF=gi:531107 /FEA=mRNA /CNT=1 /TID=Hs.289105.5 /TIER=ConsEnd /STK=0 /UG=Hs.289105 /LL=6757 /UG_GENE=SSX2 /DEF=Homo spaiens mRNA for SYT-SSX protein. /PROD=SYT-SSX protein	X79200	---	---	52726157	chrX:52726157-52729630 (+) // 90.69 // p11.22 /// chrX:48206059-48209578 (+) // 87.17 // p11.23 /// chrX:52786928-52790401 (-) // 90.69 // p11.22	---	---
216471_x_at	1768.05	1217	265.787	Hs.289105.5	gb:X79200.1 /DB_XREF=gi:531107 /FEA=mRNA /CNT=1 /TID=Hs.289105.5 /TIER=ConsEnd /STK=0 /UG=Hs.289105 /LL=6757 /UG_GENE=SSX2 /DEF=Homo spaiens mRNA for SYT-SSX protein. /PROD=SYT-SSX protein	X79200	Hs.289105	Hs.289105	52786928	chrX:52786928-52790401 (+) // 90.69 // p11.22 /// chrX:52726157-52729630 (-) // 90.69 // p11.22 /// chrX:48206059-48209578 (-) // 87.17 // p11.23	synovial sarcoma, X breakpoint 2 /// synovial sarcoma, X breakpoint 2B	SSX2 /// SSX2B
236040_at	161.078	33.8343	31.2856	Hs.43879.0	gb:AI742551 /DB_XREF=gi:5110839 /DB_XREF=wg55c11.x1 /CLONE=IMAGE:2369012 /FEA=EST /CNT=12 /TID=Hs.43879.0 /TIER=ConsEnd /STK=0 /UG=Hs.43879 /UG_TITLE=ESTs, Weakly similar to GGE1_HUMAN GAGE-1 PROTEIN (H.sapiens)	AI742551	Hs.43879	Hs.43879	52891559	chrX:52891559-52897127 (-) // 94.05 // p11.22	X antigen family, member 3	XAGE3
201589_at	478.318	86.0494	10.8898	Hs.211602.0	gb:D80000.1 /DB_XREF=gi:1136415 /GEN=KIAA0178 /FEA=FLmRNA /CNT=190 /TID=Hs.211602.0 /TIER=Stack /STK=49 /UG=Hs.211602 /LL=8243 /UG_TITLE=SMC1 (structural maintenance of chromosomes 1, yeast)-like 1 /DEF=Human mRNA for KIAA0178 gene, partial cds. /FL=gb:NM_006306.1	D80000	Hs.211602	Hs.211602	53404964	chrX:53404964-53449629 (-) // 80.44 // p11.22	structural maintenance of chromosomes 1A	SMC1A
236294_at	212.599	13.8997	16.6956	Hs.167040.0	gb:R37670 /DB_XREF=gi:795126 /DB_XREF=yf61f03.s1 /CLONE=IMAGE:26682 /FEA=EST /CNT=8 /TID=Hs.167040.0 /TIER=ConsEnd /STK=5 /UG=Hs.167040 /UG_TITLE=ESTs	R37670	Hs.167040	Hs.136905	53559062	chrX:53559062-53559797 (-) // 94.8 // p11.22	HECT, UBA and WWE domain containing 1	HUWE1
212916_at	878.882	319.555	124.334	Hs.285641.0	gb:AW249934 /DB_XREF=gi:6592927 /DB_XREF=2821853.3prime /CLONE=IMAGE:2821853 /FEA=mRNA /CNT=91 /TID=Hs.285641.0 /TIER=Stack /STK=40 /UG=Hs.285641 /LL=23133 /UG_GENE=KIAA1111 /UG_TITLE=KIAA1111 protein	AW249934	Hs.285641	Hs.133352	53963112	chrX:53963112-54071396 (-) // 98.53 // p11.22	PHD finger protein 8	PHF8
229512_at	966.997	41.8106	20.9441	Hs.86045.0	gb:BE464337 /DB_XREF=gi:9510112 /DB_XREF=hx88d12.x1 /CLONE=IMAGE:3194903 /FEA=EST /CNT=14 /TID=Hs.86045.0 /TIER=Stack /STK=13 /UG=Hs.86045 /UG_TITLE=ESTs	BE464337	Hs.86045	Hs.86045	54094756	chrX:54094756-54095212 (-) // 77.99 // p11.22	family with sequence similarity 120C	FAM120C
236236_at	253.795	44.1332	65.7651	Hs.111973.0	gb:R43746 /DB_XREF=gi:821659 /DB_XREF=yg20h11.s1 /CLONE=IMAGE:32930 /FEA=EST /CNT=9 /TID=Hs.111973.0 /TIER=ConsEnd /STK=3 /UG=Hs.111973 /UG_TITLE=ESTs	R43746	Hs.111973	Hs.92423	54219255	chrX:54219255-54219838 (-) // 97.82 // p11.22	WNK lysine deficient protein kinase 3	WNK3
213079_at	287.168	191.179	108.177	Hs.178207.0	gb:AA223871 /DB_XREF=gi:1844456 /DB_XREF=zr13a02.s1 /CLONE=IMAGE:648650 /FEA=mRNA /CNT=59 /TID=Hs.178207.0 /TIER=Stack /STK=18 /UG=Hs.178207 /UG_TITLE=Homo sapiens clone DT1P1A10 mRNA, CAG repeat region	AA223871	Hs.178207	Hs.522662	54466857	chrX:54466857-54471946 (+) // 99.31 // p11.22	TSR2, 20S rRNA accumulation, homolog (S. cerevisiae)	TSR2
231307_at	223.603	30.5211	10.1273	Hs.293317.0	gb:AW002915 /DB_XREF=gi:5849831 /DB_XREF=wr02h09.x1 /CLONE=IMAGE:2480417 /FEA=EST /CNT=16 /TID=Hs.293317.0 /TIER=Stack /STK=16 /UG=Hs.293317 /UG_TITLE=ESTs, Weakly similar to JM27 (H.sapiens)	AW002915	---	---	55306533	chrX:55306533-55315221 (+) // 92.6 // p11.21	---	---
215884_s_at	172.28	5.6045	16.0071	Hs.4552.1	gb:AK001029.1 /DB_XREF=gi:7022050 /FEA=mRNA /CNT=2 /TID=Hs.4552.1 /TIER=ConsEnd /STK=0 /UG=Hs.4552 /LL=29978 /UG_GENE=UBQLN2 /UG_TITLE=ubiquilin 2 /DEF=Homo sapiens cDNA FLJ10167 fis, clone HEMBA1003617, highly similar to Homo sapiens HRIHFB2157 mRNA.	AK001029	Hs.4552	Hs.179309	56591239	chrX:56591239-56593352 (+) // 92.93 // p11.21	ubiquilin 2	UBQLN2
206323_x_at	7022.39	766.842	2536.36	g4505506	gb:NM_002547.1 /DB_XREF=gi:4505506 /GEN=OPHN1 /FEA=FLmRNA /CNT=14 /TID=Hs.128824.0 /TIER=FL /STK=0 /UG=Hs.128824 /LL=4983 /DEF=Homo sapiens oligophrenin 1 (OPHN1), mRNA. /PROD=oligophrenin 1, Rho-GTPase acivating protein /FL=gb:NM_002547.1	NM_002547	Hs.128824	Hs.128824	67262751	chrX:67262751-67653647 (-) // 87.66 // q12	oligophrenin 1	OPHN1
212341_at	201.928	58.3438	60.2393	Hs.82719.0	gb:AA195936 /DB_XREF=gi:1791527 /DB_XREF=zp99d04.s1 /CLONE=IMAGE:628327 /FEA=mRNA /CNT=195 /TID=Hs.82719.0 /TIER=Stack /STK=19 /UG=Hs.82719 /UG_TITLE=Homo sapiens mRNA; cDNA DKFZp586F1822 (from clone DKFZp586F1822)	AA195936	Hs.82719	Hs.82719	67718879	chrX:67718879-67757124 (+) // 78.8 // q12	Yip1 domain family, member 6	YIPF6
242337_at	563.788	28.8071	21.5364	Hs.191870.0	gb:AI347128 /DB_XREF=gi:4084334 /DB_XREF=tc04a02.x1 /CLONE=IMAGE:2062826 /FEA=EST /CNT=6 /TID=Hs.191870.0 /TIER=ConsEnd /STK=3 /UG=Hs.191870 /UG_TITLE=ESTs	AI347128	Hs.191870	Hs.682435	69356800	chrX:69356800-69357601 (+) // 34.15 // q13.1	---	---
223037_at	457.824	60.4248	89.5569	g7106843	gb:AF151061.1 /DB_XREF=gi:7106843 /FEA=FLmRNA /CNT=192 /TID=Hs.11042.0 /TIER=FL /STK=0 /UG=Hs.11042 /LL=51248 /UG_GENE=LOC51248 /DEF=Homo sapiens HSPC227 mRNA, complete cds. /PROD=HSPC227 /FL=gb:NM_016484.1 gb:AF151061.1	AF151061	Hs.11042	Hs.11042	69506447	chrX:69506447-69509767 (-) // 97.22 // q13.1	PDZ domain containing 11	PDZD11
224684_at	173.332	89.8497	63.5607	Hs.5076.0	gb:AL559283 /DB_XREF=gi:12904633 /DB_XREF=AL559283 /CLONE=CS0DJ012YK21 (3 prime) /FEA=mRNA /CNT=180 /TID=Hs.5076.0 /TIER=Stack /STK=79 /UG=Hs.5076 /UG_TITLE=Homo sapiens cDNA: FLJ22128 fis, clone HEP19543	AL559283	Hs.5076	Hs.260750	70278254	chrX:70278254-70280613 (-) // 91.32 // q13.1	sorting nexin 12	SNX12
227205_at	418.502	26.646	24.4862	Hs.1179.1	gb:AW575233 /DB_XREF=gi:7246772 /DB_XREF=UI-HF-BK0-aav-f-01-0-UI.s1 /CLONE=IMAGE:3055225 /FEA=EST /CNT=27 /TID=Hs.1179.1 /TIER=Stack /STK=21 /UG=Hs.1179 /LL=6872 /UG_GENE=TAF2A /UG_TITLE=TATA box binding protein (TBP)-associated factor, RNA polymerase II, A, 250kD	AW575233	Hs.1179	Hs.158560	70685250	chrX:70685250-70685854 (+) // 74.24 // q13.1	TAF1 RNA polymerase II, TATA box binding protein (TBP)-associated factor, 250kDa	TAF1
209240_at	638.209	53.8823	36.7277	Hs.100293.1	gb:AF070560.1 /DB_XREF=gi:3387927 /FEA=FLmRNA /CNT=137 /TID=Hs.100293.1 /TIER=Stack /STK=34 /UG=Hs.100293 /LL=8473 /UG_GENE=OGT /UG_TITLE=O-linked N-acetylglucosamine (GlcNAc) transferase (UDP-N-acetylglucosamine:polypeptide-N-acetylglucosaminyl transferase) /DEF=Homo sapiens clone 24689 mRNA sequence. /FL=gb:AF223393.1	AF070560	Hs.100293	Hs.405410	70767350	chrX:70767350-70795742 (+) // 98.64 // q13.1	O-linked N-acetylglucosamine (GlcNAc) transferase (UDP-N-acetylglucosamine:polypeptide-N-acetylglucosaminyl transferase)	OGT
238825_at	291.135	100.077	37.8949	Hs.135167.0	gb:AI091533 /DB_XREF=gi:3430592 /DB_XREF=oo23d05.x1 /CLONE=IMAGE:1567017 /FEA=EST /CNT=7 /TID=Hs.135167.0 /TIER=ConsEnd /STK=3 /UG=Hs.135167 /UG_TITLE=ESTs	AI091533	Hs.135167	Hs.135167	70832707	chrX:70832707-70833433 (+) // 94.65 // q13.1	acidic repeat containing	ACRC
214224_s_at	611.871	37.9004	38.9505	Hs.11774.1	gb:BE674061 /DB_XREF=gi:10034602 /DB_XREF=7d74a04.x1 /CLONE=IMAGE:3278670 /FEA=EST /CNT=20 /TID=Hs.11774.1 /TIER=Stack /STK=15 /UG=Hs.11774 /LL=5303 /UG_GENE=PIN4 /UG_TITLE=protein (peptidyl-prolyl cistrans isomerase) NIMA-interacting, 4 (parvulin)	BE674061	Hs.11774	Hs.655623	71401643	chrX:71401643-71417393 (+) // 96.11 // q13.1	protein (peptidylprolyl cis/trans isomerase) NIMA-interacting, 4 (parvulin)	PIN4
213347_x_at	5472.65	637.374	1124.24	Hs.108124.5	gb:AW132023 /DB_XREF=gi:6133630 /DB_XREF=xe71b05.x1 /CLONE=IMAGE:2613297 /FEA=EST /CNT=50 /TID=Hs.108124.5 /TIER=Stack /STK=10 /UG=Hs.108124 /LL=6191 /UG_GENE=RPS4X /UG_TITLE=ribosomal protein S4, X-linked	AW132023	Hs.108124	Hs.118076	71492453	chrX:71492453-71493236 (-) // 94.19 // q13.1	ribosomal protein S4, X-linked	RPS4X
229876_at	175.798	7.65574	10.2004	Hs.296095.0	gb:BE503584 /DB_XREF=gi:9705992 /DB_XREF=hz87g10.x1 /CLONE=IMAGE:3215010 /FEA=EST /CNT=13 /TID=Hs.296095.0 /TIER=Stack /STK=8 /UG=Hs.296095 /UG_TITLE=ESTs	BE503584	Hs.296095	Hs.201379	71798663	chrX:71798663-71799128 (-) // 93.94 // q13.1	phosphorylase kinase, alpha 1 (muscle)	PHKA1
235446_at	187.753	10.0307	13.4231	Hs.293702.0	gb:AW856618 /DB_XREF=gi:7952311 /DB_XREF=RC3-CT0297-060100-012-e08 /FEA=EST /CNT=11 /TID=Hs.293702.0 /TIER=ConsEnd /STK=0 /UG=Hs.293702 /UG_TITLE=ESTs	AW856618	Hs.293702	Hs.724376	73071140	chrX:73071140-73072160 (+) // 98.92 // q13.2	X (inactive)-specific transcript (non-protein coding)	XIST
225416_at	507.5	41.1471	29.8172	Hs.15043.1	gb:N58188 /DB_XREF=gi:1202078 /DB_XREF=yv66c08.s1 /CLONE=IMAGE:247694 /FEA=EST /CNT=111 /TID=Hs.15043.1 /TIER=Stack /STK=45 /UG=Hs.15043 /UG_TITLE=Homo sapiens clone FLB5227 PRO1367 mRNA, complete cds	N58188	Hs.15043	Hs.653288	73804835	chrX:73804835-73806870 (-) // 87.67 // q13.2	ring finger protein, LIM domain interacting	RLIM
209620_s_at	247.142	20.3353	19.9349	g3228278	gb:AB005289.1 /DB_XREF=gi:3228278 /GEN=hABC7 /FEA=FLmRNA /CNT=88 /TID=Hs.125856.0 /TIER=FL+Stack /STK=39 /UG=Hs.125856 /LL=22 /DEF=Homo sapiens mRNA for ABC transporter 7 protein, complete cds. /PROD=ABC transporter 7 protein /FL=gb:NM_004299.2 gb:AF038950.1 gb:AB005289.1 gb:AF133659.1	AB005289	Hs.125856	Hs.370480	74273115	chrX:74273115-74376115 (-) // 97.39 // q13.3	ATP-binding cassette, sub-family B (MDR/TAP), member 7	ABCB7
223294_at	317.716	10.48	12.5044	g12654754	gb:BC001220.1 /DB_XREF=gi:12654754 /FEA=FLmRNA /CNT=83 /TID=Hs.128764.1 /TIER=FL+Stack /STK=19 /UG=Hs.128764 /LL=51260 /UG_GENE=LOC51260 /DEF=Homo sapiens, hypothetical protein, clone MGC:874, mRNA, complete cds. /PROD=hypothetical protein /FL=gb:NM_016500.1 gb:BC001220.1	BC001220	Hs.128764	Hs.370100	75392770	chrX:75392770-75398033 (+) // 83.69 // q13.3	chromosome X open reading frame 26	CXorf26
208861_s_at	809.346	11.2035	11.2201	g6960325	gb:U72937.2 /DB_XREF=gi:6960325 /GEN=ATRX /FEA=FLmRNA /CNT=226 /TID=Hs.96264.0 /TIER=FL+Stack /STK=24 /UG=Hs.96264 /LL=546 /DEF=Homo sapiens putative DNA dependent ATPase and helicase (ATRX) mRNA, alternatively spliced product 2, complete cds. /PROD=putative DNA dependent ATPase and helicase /FL=gb:NM_000489.1 gb:U09820.1 gb:U72937.2	U72937	Hs.96264	Hs.533526	76761190	chrX:76761190-77041702 (-) // 98.34 // q21.1	alpha thalassemia/mental retardation syndrome X-linked	ATRX
210596_at	723.568	22.0906	21.1005	g11493511	gb:AF130104.1 /DB_XREF=gi:11493511 /FEA=FLmRNA /CNT=6 /TID=Hs.305979.0 /TIER=FL /STK=0 /UG=Hs.305979 /DEF=Homo sapiens clone FLB3024 PRO0756 mRNA, complete cds. /PROD=PRO0756 /FL=gb:AF130104.1	AF130104	Hs.305979	Hs.724488	77081860	chrX:77081860-77082770 (+) // 86.24 // q21.1	magnesium transporter 1	MAGT1
202110_at	333.486	139.239	135.647	g4502990	gb:NM_001866.1 /DB_XREF=gi:4502990 /GEN=COX7B /FEA=FLmRNA /CNT=236 /TID=Hs.75752.0 /TIER=FL+Stack /STK=88 /UG=Hs.75752 /LL=1349 /DEF=Homo sapiens cytochrome c oxidase subunit VIIb (COX7B), mRNA. /PROD=cytochrome c oxidase subunit VIIb /FL=gb:NM_001866.1	NM_001866	Hs.75752	Hs.522699	77154960	chrX:77154960-77160881 (+) // 97.44 // q21.1	cytochrome c oxidase subunit VIIb	COX7B
200737_at	342.193	83.5937	112.498	g4505762	gb:NM_000291.1 /DB_XREF=gi:4505762 /GEN=PGK1 /FEA=FLmRNA /CNT=450 /TID=Hs.78771.0 /TIER=FL+Stack /STK=249 /UG=Hs.78771 /LL=5230 /DEF=Homo sapiens phosphoglycerate kinase 1 (PGK1), mRNA. /PROD=phosphoglycerate kinase 1 /FL=gb:NM_000291.1	NM_000291	Hs.78771	Hs.78771	77359758	chrX:77359758-77381761 (+) // 100.0 // q21.1 /// chrX:67289927-67291659 (-) // 92.98 // q12	phosphoglycerate kinase 1	PGK1
244738_at	446.141	99.7227	92.0971	Hs.134880.0	gb:BG109305 /DB_XREF=gi:12602823 /DB_XREF=602281157F1 /CLONE=IMAGE:4368662 /FEA=EST /CNT=11 /TID=Hs.134880.0 /TIER=ConsEnd /STK=1 /UG=Hs.134880 /UG_TITLE=ESTs, Weakly similar to unnamed protein product (H.sapiens)	BG109305	Hs.134880	Hs.170667	79931337	chrX:79931337-79938128 (-) // 87.28 // q21.1	bromodomain and WD repeat domain containing 3	BRWD3
228503_at	237.797	25.5377	10.9846	Hs.234478.0	gb:AW025023 /DB_XREF=gi:5878553 /DB_XREF=wu93b06.x1 /CLONE=IMAGE:2527571 /FEA=mRNA /CNT=24 /TID=Hs.234478.0 /TIER=Stack /STK=11 /UG=Hs.234478 /UG_TITLE=Homo sapiens cDNA: FLJ22648 fis, clone HSI07329	AW025023	Hs.234478	Hs.234478	83315112	chrX:83315112-83318644 (-) // 98.39 // q21.1	ribosomal protein S6 kinase, 90kDa, polypeptide 6	RPS6KA6
215780_s_at	336.303	84.4847	50.3147	Hs.248054.0	gb:Z95126 /DB_XREF=gi:2342581 /FEA=DNA /CNT=2 /TID=Hs.248054.0 /TIER=ConsEnd /STK=0 /UG=Hs.248054 /UG_TITLE=Human DNA sequence from PAC 30P20 on chromosome Xq21.1-Xq21.3. Contains set pseudogene, ESTs and STS /DEF=Human DNA sequence from PAC 30P20 on chromosome Xq21.1-Xq21.3. Contains set pseudogene, ESTs and STS	Z95126	Hs.248054	Hs.436687	84010005	chrX:84010005-84011010 (+) // 79.66 // q21.1	SET translocation (myeloid leukemia-associated) pseudogene /// SET nuclear oncogene	LOC642869 /// SET
244187_at	661.398	8.91654	22.9851	Hs.191543.0	gb:AA053853 /DB_XREF=gi:1544797 /DB_XREF=zf52d01.r1 /CLONE=IMAGE:380545 /FEA=EST /CNT=6 /TID=Hs.191543.0 /TIER=ConsEnd /STK=3 /UG=Hs.191543 /UG_TITLE=ESTs	AA053853	Hs.191543	Hs.706885	84343351	chrX:84343351-84343788 (-) // 34.67 // q21.1	Apolipoprotein O-like	APOOL
228988_at	878.431	185.336	257.594	Hs.323950.1	gb:AU157017 /DB_XREF=gi:11018538 /DB_XREF=AU157017 /CLONE=PLACE1005740 /FEA=EST /CNT=16 /TID=Hs.323950.1 /TIER=Stack /STK=13 /UG=Hs.323950 /LL=7552 /UG_GENE=ZNF6 /UG_TITLE=zinc finger protein 6 (CMPX1)	AU157017	Hs.323950	Hs.326801	84527506	chrX:84527506-84528404 (+) // 99.89 // q21.1	zinc finger protein 711	ZNF711
227871_at	120.342	12.5591	14.3964	Hs.13442.0	gb:AA878377 /DB_XREF=gi:2987342 /DB_XREF=oe65b05.s1 /CLONE=IMAGE:1416465 /FEA=EST /CNT=19 /TID=Hs.13442.0 /TIER=Stack /STK=14 /UG=Hs.13442 /UG_TITLE=ESTs	AA878377	Hs.13442	Hs.496449	85116188	chrX:85116188-85116796 (-) // 75.34 // q21.2	choroideremia (Rab escort protein 1)	CHM
209108_at	285.064	69.7105	25.1144	g2995860	gb:AF053453.1 /DB_XREF=gi:2995860 /GEN=TSPAN-6 /FEA=FLmRNA /CNT=226 /TID=Hs.121068.0 /TIER=FL+Stack /STK=74 /UG=Hs.121068 /LL=7105 /DEF=Homo sapiens tetraspan TM4SF (TSPAN-6) mRNA, complete cds. /PROD=tetraspan TM4SF /FL=gb:AF053453.1 gb:NM_003270.1 gb:AF043906.1 gb:AF133426.1 gb:U84895.1	AF053453	Hs.121068	Hs.43233	99884026	chrX:99884026-99891701 (-) // 98.14 // q22.1	tetraspanin 6	TSPAN6
227703_s_at	153.263	7.12123	13.3023	Hs.247525.1	gb:AL391688 /DB_XREF=gi:9944216 /FEA=DNA_2 /CNT=27 /TID=Hs.247525.1 /TIER=Stack /STK=18 /UG=Hs.247525 /UG_TITLE=Human DNA sequence from clone RP11-524D16 on chromosome X. Contains ESTs, STSs and GSSs. Contains the 3 part of the SRPX gene for a sushi-repeat containing protein and a novel gene for two protein isoforms similar to mouse granuphilin a und b /DEF=Human DNA sequence from clone RP11-524D…	AL391688	Hs.247525	Hs.592224	99929075	chrX:99929075-99946206 (-) // 95.98 // q22.1	synaptotagmin-like 4	SYTL4
204459_at	522.184	162.559	108.219	g4557492	gb:NM_001325.1 /DB_XREF=gi:4557492 /GEN=CSTF2 /FEA=FLmRNA /CNT=66 /TID=Hs.693.0 /TIER=FL+Stack /STK=23 /UG=Hs.693 /LL=1478 /DEF=Homo sapiens cleavage stimulation factor, 3 pre-RNA, subunit 2, 64kD (CSTF2), mRNA. /PROD=cleavage stimulation factor subunit 2 /FL=gb:M85085.1 gb:NM_001325.1	NM_001325	Hs.693	Hs.132370	100075383	chrX:100075383-100095921 (+) // 100.0 // q22.1	cleavage stimulation factor, 3' pre-RNA, subunit 2, 64kDa	CSTF2
201132_at	1017.79	95.6159	47.0575	g9624997	gb:NM_019597.1 /DB_XREF=gi:9624997 /GEN=HNRPH2 /FEA=FLmRNA /CNT=264 /TID=Hs.278857.0 /TIER=FL+Stack /STK=115 /UG=Hs.278857 /LL=3188 /DEF=Homo sapiens heterogeneous nuclear ribonucleoprotein H2 (H) (HNRPH2), mRNA. /PROD=heterogeneous nuclear ribonucleoprotein H2 (H) /FL=gb:NM_019597.1	NM_019597	Hs.278857	Hs.632828	100666921	chrX:100666921-100669118 (+) // 100.0 // q22.1	heterogeneous nuclear ribonucleoprotein H2 (H')	HNRNPH2
214749_s_at	478.192	15.2894	44.0167	Hs.83530.1	gb:AK000818.1 /DB_XREF=gi:7021128 /FEA=mRNA /CNT=30 /TID=Hs.83530.1 /TIER=ConsEnd /STK=0 /UG=Hs.83530 /LL=54470 /UG_GENE=FLJ20811 /UG_TITLE=hypothetical protein /DEF=Homo sapiens cDNA FLJ20811 fis, clone ADSE01435.	AK000818	Hs.83530	Hs.83530	100852487	chrX:100852487-100853647 (+) // 62.74 // q22.1 /// chrX:100870109-100872972 (-) // 95.66 // q22.1	armadillo repeat containing, X-linked 6	ARMCX6
234173_s_at	312.017	191.84	111.582	Hs.306209.2	gb:AL157436.1 /DB_XREF=gi:7018509 /GEN=DKFZp434B1612 /FEA=mRNA /CNT=1 /TID=Hs.306209.2 /TIER=ConsEnd /STK=0 /UG=Hs.306209 /LL=56001 /DEF=Homo sapiens mRNA; cDNA DKFZp434B1612 (from clone DKFZp434B1612); partial cds. /PROD=hypothetical protein	AL157436	Hs.306209	Hs.530358	101478828	chrX:101478828-101581633 (+) // 90.6 // q22.1 /// chrX:101615316-101718195 (-) // 90.57 // q22.1	nuclear RNA export factor 2 /// nuclear RNA export factor 2B	NXF2 /// NXF2B
205347_s_at	401.249	42.6935	12.7671	g11496272	gb:NM_021992.1 /DB_XREF=gi:11496272 /GEN=TMSNB /FEA=FLmRNA /CNT=59 /TID=Hs.56145.0 /TIER=FL+Stack /STK=35 /UG=Hs.56145 /LL=11013 /DEF=Homo sapiens thymosin, beta, identified in neuroblastoma cells (TMSNB), mRNA. /PROD=thymosin, beta, identified in neuroblastomacells /FL=gb:NM_021992.1 gb:D82345.1 gb:BC000183.1	NM_021992	Hs.56145	Hs.56145	101768610	chrX:101768610-101771673 (-) // 100.0 // q22.1	thymosin beta 15a	TMSB15A
228027_at	460.488	211.677	49.0794	Hs.246112.2	gb:BF732712 /DB_XREF=gi:12057787 /DB_XREF=nae14e07.x1 /CLONE=IMAGE:3435349 /FEA=EST /CNT=26 /TID=Hs.246112.2 /TIER=Stack /STK=23 /UG=Hs.246112 /LL=23020 /UG_GENE=KIAA0788 /UG_TITLE=KIAA0788 protein	BF732712	Hs.246112	---	101971649	chrX:101971649-101972659 (+) // 84.93 // q22.1	G protein-coupled receptor associated sorting protein 2	GPRASP2
213709_at	331.902	38.3093	12.5351	Hs.4276.0	gb:H11725 /DB_XREF=gi:876545 /DB_XREF=ym11c07.s1 /CLONE=IMAGE:47686 /FEA=mRNA /CNT=34 /TID=Hs.4276.0 /TIER=Stack /STK=12 /UG=Hs.4276 /LL=80823 /UG_GENE=KIAA1701 /UG_TITLE=KIAA1701 protein	H11725	Hs.4276	Hs.4276	101975691	chrX:101975691-102007849 (+) // 73.2 // q22.1	basic helix-loop-helix domain containing, class B, 9	BHLHB9
202371_at	1289	83.9424	152.283	g13376293	gb:NM_024863.1 /DB_XREF=gi:13376293 /GEN=FLJ21174 /FEA=FLmRNA /CNT=146 /TID=Hs.194329.0 /TIER=FL /STK=2 /UG=Hs.194329 /LL=79921 /DEF=Homo sapiens hypothetical protein FLJ21174 (FLJ21174), mRNA. /PROD=hypothetical protein FLJ21174 /FL=gb:NM_024863.1 gb:AF271783.1	NM_024863	Hs.194329	Hs.194329	102840419	chrX:102840419-102842443 (+) // 74.73 // q22.2	transcription elongation factor A (SII)-like 4	TCEAL4
201994_at	1687.58	957.619	1016.89	g6912447	gb:NM_012286.1 /DB_XREF=gi:6912447 /GEN=KIAA0026 /FEA=FLmRNA /CNT=195 /TID=Hs.173714.0 /TIER=FL+Stack /STK=142 /UG=Hs.173714 /LL=9643 /DEF=Homo sapiens MORF-related gene X (KIAA0026), mRNA. /PROD=MORF-related gene X /FL=gb:NM_012286.1 gb:AF167174.1 gb:D14812.1 gb:AF100620.1	NM_012286	Hs.173714	Hs.326387	102930432	chrX:102930432-102941596 (-) // 97.04 // q22.2	mortality factor 4 like 2	MORF4L2
214051_at	152.404	10.8838	9.15453	Hs.56145.1	gb:BF677486 /DB_XREF=gi:11951381 /DB_XREF=602085745F1 /CLONE=IMAGE:4249834 /FEA=EST /CNT=19 /TID=Hs.56145.1 /TIER=Stack /STK=14 /UG=Hs.56145 /LL=11013 /UG_GENE=TMSNB /UG_TITLE=thymosin, beta, identified in neuroblastoma cells	BF677486	Hs.56145	Hs.709594	103217214	chrX:103217214-103220549 (+) // 95.79 // q22.2	thymosin beta 15B	TMSB15B
229531_at	307.511	10.5796	8.81516	Hs.9977.0	gb:AW182938 /DB_XREF=gi:6451398 /DB_XREF=xj65c08.x1 /CLONE=IMAGE:2662094 /FEA=EST /CNT=15 /TID=Hs.9977.0 /TIER=Stack /STK=11 /UG=Hs.9977 /UG_TITLE=ESTs	AW182938	Hs.9977	Hs.530359	103364227	chrX:103364227-103364882 (-) // 8.53 // q22.2	---	---
239762_at	125.06	34.7014	35.4557	Hs.134529.0	gb:AI080505 /DB_XREF=gi:3416756 /DB_XREF=oz38f09.s1 /CLONE=IMAGE:1677641 /FEA=EST /CNT=7 /TID=Hs.134529.0 /TIER=ConsEnd /STK=1 /UG=Hs.134529 /UG_TITLE=ESTs	AI080505	Hs.134529	Hs.656786	103366935	chrX:103366935-103367364 (-) // 78.44 // q22.2	hypothetical protein LOC286437	LOC286437
225216_at	431.087	28.8503	30.9363	Hs.54347.0	gb:AI590719 /DB_XREF=gi:4599767 /DB_XREF=tw87h02.x1 /CLONE=IMAGE:2266707 /FEA=EST /CNT=86 /TID=Hs.54347.0 /TIER=Stack /STK=40 /UG=Hs.54347 /UG_TITLE=ESTs	AI590719	Hs.54347	Hs.592223	103437467	chrX:103437467-103440583 (+) // 97.37 // q22.2	family with sequence similarity 199, X-linked	FAM199X
219355_at	201.667	64.9649	8.356	g13443025	gb:NM_018015.2 /DB_XREF=gi:13443025 /GEN=FLJ10178 /FEA=FLmRNA /CNT=37 /TID=Hs.274267.0 /TIER=FL+Stack /STK=15 /UG=Hs.274267 /LL=55086 /DEF=Homo sapiens hypothetical protein FLJ10178 (FLJ10178), mRNA. /PROD=hypothetical protein FLJ10178 /FL=gb:NM_018015.2	NM_018015	Hs.274267	Hs.274267	105855886	chrX:105855886-105922667 (+) // 99.93 // q22.3	chromosome X open reading frame 57	CXorf57
237043_at	267.417	18.9424	34.1759	Hs.16360.0	gb:R30930 /DB_XREF=gi:786773 /DB_XREF=yh60a04.s1 /CLONE=IMAGE:134094 /FEA=EST /CNT=7 /TID=Hs.16360.0 /TIER=ConsEnd /STK=7 /UG=Hs.16360 /UG_TITLE=ESTs	R30930	Hs.16360	Hs.16360	106182388	chrX:106182388-106182827 (-) // 90.05 // q22.3	---	---
219038_at	505.038	95.6212	96.5917	g13375906	gb:NM_024657.1 /DB_XREF=gi:13375906 /GEN=FLJ11565 /FEA=FLmRNA /CNT=59 /TID=Hs.61763.0 /TIER=FL+Stack /STK=18 /UG=Hs.61763 /LL=79710 /DEF=Homo sapiens hypothetical protein FLJ11565 (FLJ11565), mRNA. /PROD=hypothetical protein FLJ11565 /FL=gb:NM_024657.1	NM_024657	Hs.61763	Hs.496544	106183965	chrX:106183965-106200208 (-) // 91.92 // q22.3	MORC family CW-type zinc finger 4	MORC4
220520_s_at	129.462	22.5029	25.9868	g8923134	gb:NM_017681.1 /DB_XREF=gi:8923134 /GEN=FLJ20130 /FEA=FLmRNA /CNT=5 /TID=Hs.163629.0 /TIER=FL /STK=0 /UG=Hs.163629 /LL=54830 /DEF=Homo sapiens hypothetical protein FLJ20130 (FLJ20130), mRNA. /PROD=hypothetical protein FLJ20130 /FL=gb:NM_017681.1	NM_017681	Hs.163629	Hs.163629	106366710	chrX:106366710-106449544 (-) // 88.01 // q22.3	nucleoporin 62kDa C-terminal like	NUP62CL
219485_s_at	725.473	242.59	109.438	g4506216	gb:NM_002814.1 /DB_XREF=gi:4506216 /GEN=PSMD10 /FEA=FLmRNA /CNT=29 /TID=Hs.7756.0 /TIER=FL /STK=1 /UG=Hs.7756 /LL=5716 /DEF=Homo sapiens proteasome (prosome, macropain) 26S subunit, non-ATPase, 10 (PSMD10), mRNA. /PROD=proteasome (prosome, macropain) 26S subunit,non-ATPase, 10 /FL=gb:D83197.1 gb:AB009619.1 gb:NM_002814.1	NM_002814	Hs.7756	Hs.522752	107327438	chrX:107327438-107334848 (-) // 100.0 // q22.3	proteasome (prosome, macropain) 26S subunit, non-ATPase, 10	PSMD10
213115_at	131.073	18.5878	40.8587	Hs.8763.0	gb:AL031177 /DB_XREF=gi:4071056 /FEA=DNA_3 /CNT=72 /TID=Hs.8763.0 /TIER=Stack /STK=38 /UG=Hs.8763 /UG_TITLE=Human DNA sequence from clone 889N15 on chromosome Xq22.1-22.3. Contains part of the gene for a novel protein similar to X. laevis Cortical Thymocyte Marker CTX, the possibly alternatively spliced gene for 26S Proteasome subunit p28 (Ankyrin repeat protein), a novel gene and exons 36 throug…	AL031177	Hs.8763	Hs.8763	107334897	chrX:107334897-107397896 (+) // 88.7 // q22.3	ATG4 autophagy related 4 homolog A (S. cerevisiae)	ATG4A
209628_at	1088.34	398.477	368.001	Hs.25010.1	gb:AK023289.1 /DB_XREF=gi:10435160 /FEA=FLmRNA /CNT=81 /TID=Hs.25010.1 /TIER=Stack /STK=27 /UG=Hs.25010 /LL=55916 /UG_GENE=P15-2 /UG_TITLE=hypothetical protein P15-2 /DEF=Homo sapiens cDNA FLJ13227 fis, clone OVARC1000071, weakly similar to Homo sapiens NTF2-related export protein NXT1 (NXT1) mRNA. /FL=gb:AF201942.1 gb:NM_018698.1 gb:AF246127.1	AK023289	Hs.25010	Hs.25010	108779009	chrX:108779009-108787918 (+) // 97.25 // q23	nuclear transport factor 2-like export factor 2	NXT2
202422_s_at	107.718	12.3217	33.4667	g12669908	gb:NM_022977.1 /DB_XREF=gi:12669908 /GEN=FACL4 /FEA=FLmRNA /CNT=145 /TID=Hs.81452.0 /TIER=FL+Stack /STK=36 /UG=Hs.81452 /LL=2182 /DEF=Homo sapiens fatty-acid-Coenzyme A ligase, long-chain 4 (FACL4), transcript variant 2, mRNA. /PROD=long-chain fatty-acid-Coenzyme A ligase 4,isoform 2 /FL=gb:NM_022977.1	NM_022977	Hs.81452	Hs.268785	108884565	chrX:108884565-108976619 (-) // 98.1 // q23	acyl-CoA synthetase long-chain family member 4	ACSL4
226421_at	147.528	8.1143	7.77044	Hs.23625.0	gb:AA707320 /DB_XREF=gi:2717238 /DB_XREF=zj27c08.s1 /CLONE=IMAGE:451502 /FEA=mRNA /CNT=55 /TID=Hs.23625.0 /TIER=Stack /STK=18 /UG=Hs.23625 /UG_TITLE=Homo sapiens clone TCCCTA00142 mRNA sequence	AA707320	Hs.23625	Hs.656243	109437344	chrX:109437344-109439696 (-) // 94.88 // q23	Alport syndrome, mental retardation, midface hypoplasia and elliptocytosis chromosomal region gene 1	AMMECR1
209763_at	686.164	23.8394	11.1115	Hs.82223.0	gb:AL049176 /DB_XREF=gi:4808226 /FEA=FLmRNA /CNT=84 /TID=Hs.82223.0 /TIER=Stack /STK=46 /UG=Hs.82223 /LL=57803 /UG_GENE=LOC57803 /UG_TITLE=chordin-like /DEF=Human DNA sequence from clone 141H5 on chromosome Xq22.1-23. Contains parts of a novel Chordin LIKE protein with von Willebrand factor type C domains. Contains ESTs, STSs and GSSs /FL=gb:BC002909.1	AL049176	Hs.82223	Hs.496587	109917083	chrX:109917083-110038993 (-) // 90.93 // q23	chordin-like 1	CHRDL1
205584_at	1999.29	145.052	53.2708	g13376194	gb:NM_024810.1 /DB_XREF=gi:13376194 /GEN=FLJ23018 /FEA=FLmRNA /CNT=26 /TID=Hs.169078.0 /TIER=FL+Stack /STK=13 /UG=Hs.169078 /LL=79868 /DEF=Homo sapiens hypothetical protein FLJ23018 (FLJ23018), mRNA. /PROD=hypothetical protein FLJ23018 /FL=gb:NM_024810.1	NM_024810	Hs.169078	Hs.443061	110970077	chrX:110970077-111003872 (+) // 98.89 // q23	asparagine-linked glycosylation 13 homolog (S. cerevisiae)	ALG13
1559057_at	1152.04	12.8155	7.94699	Hs2.395772.1	gb:U00944.1 /DB_XREF=gi:405046 /TID=Hs2.395772.1 /CNT=8 /FEA=mRNA /TIER=ConsEnd /STK=0 /UG=Hs.395772 /UG_TITLE=Human clone A9A2BRB6 (CAC)n(GTG)n repeat-containing mRNA. /DEF=Human clone A9A2BRB6 (CAC)n(GTG)n repeat-containing mRNA.	U00944	---	---	110970917	chrX:110970917-111003169 (+) // 63.78 // q23	---	---
227688_at	198.782	22.3394	6.01661	Hs.65366.0	gb:AK022128.1 /DB_XREF=gi:10433454 /FEA=mRNA /CNT=33 /TID=Hs.65366.0 /TIER=Stack /STK=10 /UG=Hs.65366 /LL=57631 /UG_GENE=KIAA1495 /UG_TITLE=KIAA1495 protein /DEF=Homo sapiens cDNA FLJ12066 fis, clone HEMBB1002266, moderately similar to NEURONAL PROTEIN.	AK022128	Hs.65366	Hs.65366	114345178	chrX:114345178-114414065 (-) // 98.74 // q23	leucine-rich repeats and calponin homology (CH) domain containing 2	LRCH2
220665_at	341.806	103.683	42.5029	g7705970	gb:NM_016383.1 /DB_XREF=gi:7705970 /GEN=LOC51213 /FEA=FLmRNA /CNT=5 /TID=Hs.242183.0 /TIER=FL /STK=1 /UG=Hs.242183 /LL=51213 /DEF=Homo sapiens HOM-TES-85 tumor antigen (LOC51213), mRNA. /PROD=HOM-TES-85 tumor antigen /FL=gb:NM_016383.1 gb:AF124430.1	NM_016383	Hs.242183	Hs.242183	114524318	chrX:114524318-114542121 (+) // 98.49 // q23	leucine zipper protein 4	LUZP4
201215_at	460.551	92.4708	23.6456	g7549808	gb:NM_005032.2 /DB_XREF=gi:7549808 /GEN=PLS3 /FEA=FLmRNA /CNT=334 /TID=Hs.4114.0 /TIER=FL+Stack /STK=90 /UG=Hs.4114 /LL=5358 /DEF=Homo sapiens plastin 3 (T isoform) (PLS3), mRNA. /PROD=plastin 3 precursor /FL=gb:NM_005032.2 gb:M22299.1	NM_005032	Hs.4114	Hs.496622	114795508	chrX:114795508-114884990 (+) // 99.87 // q23	plastin 3	PLS3
227875_at	136.89	15.2383	6.42847	Hs.106283.4	gb:AB037730.1 /DB_XREF=gi:7242972 /GEN=KIAA1309 /FEA=mRNA /CNT=31 /TID=Hs.106283.4 /TIER=Stack /STK=16 /UG=Hs.106283 /LL=55958 /DEF=Homo sapiens mRNA for KIAA1309 protein, partial cds. /PROD=KIAA1309 protein	AB037730	Hs.106283	Hs.348262	117031776	chrX:117031776-117081905 (-) // 87.2 // q24	kelch-like 13 (Drosophila)	KLHL13
219297_at	698.886	40.2699	19.8593	g9506636	gb:NM_019045.1 /DB_XREF=gi:9506636 /GEN=FLJ11116 /FEA=FLmRNA /CNT=32 /TID=Hs.98510.0 /TIER=FL+Stack /STK=11 /UG=Hs.98510 /LL=54521 /DEF=Homo sapiens similar to rab11-binding protein (FLJ11116), mRNA. /PROD=similar to rab11-binding protein /FL=gb:NM_019045.1	NM_019045	Hs.98510	Hs.98510	117530980	chrX:117530980-117583921 (+) // 99.96 // q24	WD repeat domain 44	WDR44
226875_at	269.721	24.1851	7.49604	Hs.107513.0	gb:AI742838 /DB_XREF=gi:5111126 /DB_XREF=wg46g12.x1 /CLONE=IMAGE:2368198 /FEA=EST /CNT=32 /TID=Hs.107513.0 /TIER=Stack /STK=18 /UG=Hs.107513 /UG_TITLE=ESTs, Moderately similar to KIAA1058 protein (H.sapiens)	AI742838	Hs.107513	Hs.368203	117786006	chrX:117786006-117820311 (+) // 99.15 // q24	dedicator of cytokinesis 11	DOCK11
201887_at	898.923	92.3377	27.5525	g4504646	gb:NM_001560.1 /DB_XREF=gi:4504646 /GEN=IL13RA1 /FEA=FLmRNA /CNT=217 /TID=Hs.285115.0 /TIER=FL /STK=1 /UG=Hs.285115 /LL=3597 /DEF=Homo sapiens interleukin 13 receptor, alpha 1 (IL13RA1), mRNA. /PROD=interleukin 13 receptor, alpha 1 /FL=gb:NM_001560.1 gb:U81379.3	NM_001560	Hs.285115	Hs.496646	117861558	chrX:117861558-117928496 (+) // 90.81 // q24	interleukin 13 receptor, alpha 1	IL13RA1
201899_s_at	461.457	117.648	48.6189	g4507768	gb:NM_003336.1 /DB_XREF=gi:4507768 /GEN=UBE2A /FEA=FLmRNA /CNT=256 /TID=Hs.80612.0 /TIER=FL+Stack /STK=96 /UG=Hs.80612 /LL=7319 /DEF=Homo sapiens ubiquitin-conjugating enzyme E2A (RAD6 homolog) (UBE2A), mRNA. /PROD=ubiquitin-conjugating enzyme E2A (RAD6 homolog) /FL=gb:NM_003336.1 gb:M74524.1	NM_003336	Hs.80612	Hs.379466	118708554	chrX:118708554-118718377 (+) // 99.66 // q24	ubiquitin-conjugating enzyme E2A (RAD6 homolog)	UBE2A
218757_s_at	308.168	11.3463	12.6334	g12711673	gb:NM_023010.1 /DB_XREF=gi:12711673 /GEN=UPF3B /FEA=FLmRNA /CNT=55 /TID=Hs.103832.0 /TIER=FL+Stack /STK=18 /UG=Hs.103832 /LL=65109 /DEF=Homo sapiens similar to yeast Upf3, variant B (UPF3B), mRNA. /PROD=similar to yeast Upf3, variant B /FL=gb:NM_023010.1 gb:AY013251.1	NM_023010	Hs.103832	Hs.103832	118967988	chrX:118967988-118986961 (-) // 95.07 // q24	UPF3 regulator of nonsense transcripts homolog B (yeast)	UPF3B
202298_at	923.283	230.841	336.454	g13699820	gb:NM_004541.2 /DB_XREF=gi:13699820 /GEN=NDUFA1 /FEA=FLmRNA /CNT=237 /TID=Hs.74823.0 /TIER=FL+Stack /STK=102 /UG=Hs.74823 /LL=4694 /DEF=Homo sapiens NADH dehydrogenase (ubiquinone) 1 alpha subcomplex, 1 (7.5kD, MWFE) (NDUFA1), nuclear gene encoding mitochondrial protein, mRNA. /PROD=NADH dehydrogenase (ubiquinone) 1 alphasubcomplex, 1 /FL=gb:BC000266.1 gb:NM_004541.2 gb:U54993.1	NM_004541	Hs.74823	Hs.534168	119005733	chrX:119005733-119010618 (+) // 93.32 // q24	NADH dehydrogenase (ubiquinone) 1 alpha subcomplex, 1, 7.5kDa	NDUFA1
223439_at	325.458	47.2799	32.9075	g12654240	gb:BC000940.1 /DB_XREF=gi:12654240 /FEA=FLmRNA /CNT=50 /TID=Hs.5565.0 /TIER=FL+Stack /STK=24 /UG=Hs.5565 /LL=79576 /UG_GENE=FLJ22626 /DEF=Homo sapiens, Similar to splicing factor, arginineserine-rich 4 (SRp75), clone MGC:5283, mRNA, complete cds. /PROD=Similar to splicing factor, arginineserine-rich4 (SRp75) /FL=gb:NM_024528.1 gb:BC000940.1	BC000940	Hs.5565	Hs.522771	119059023	chrX:119059023-119077616 (-) // 98.64 // q24	NFKB activating protein	NKAP
236920_at	937.751	571.937	181.66	Hs.28937.0	gb:AI954612 /DB_XREF=gi:5746922 /DB_XREF=wq34b06.x1 /CLONE=IMAGE:2473139 /FEA=EST /CNT=7 /TID=Hs.28937.0 /TIER=ConsEnd /STK=6 /UG=Hs.28937 /UG_TITLE=ESTs, Weakly similar to PMX1_HUMAN PAIRED MESODERM HOMEOBOX PROTEIN 1 (H.sapiens)	AI954612	Hs.28937	Hs.196956	119294268	chrX:119294268-119297943 (+) // 97.48 // q24 /// chrX:119206230-119206812 (-) // 91.35 // q24	Rhox homeobox family, member 2 /// Rhox homeobox family, member 2B	RHOXF2 /// RHOXF2B
226255_at	638.644	68.1164	20.276	Hs.10852.0	gb:BE302089 /DB_XREF=gi:9185837 /DB_XREF=bb81a10.x1 /CLONE=IMAGE:3048762 /FEA=EST /CNT=53 /TID=Hs.10852.0 /TIER=Stack /STK=17 /UG=Hs.10852 /UG_TITLE=ESTs	BE302089	Hs.10852	Hs.143604	119390110	chrX:119390110-119392252 (+) // 98.98 // q24	zinc finger and BTB domain containing 33	ZBTB33
200821_at	134.423	19.7972	9.94916	g7669502	gb:NM_013995.1 /DB_XREF=gi:7669502 /GEN=LAMP2 /FEA=FLmRNA /CNT=299 /TID=Hs.8262.0 /TIER=FL+Stack /STK=50 /UG=Hs.8262 /LL=3920 /DEF=Homo sapiens lysosomal-associated membrane protein 2 (LAMP2), transcript variant LAMP2B, mRNA. /PROD=lysosomal-associated membrane protein 2precursor /FL=gb:BC002965.1 gb:U36336.1 gb:NM_013995.1	NM_013995	Hs.8262	Hs.496684	119570364	chrX:119570364-119603161 (-) // 89.19 // q24	lysosomal-associated membrane protein 2	LAMP2
231568_at	2722.69	435.356	160.772	Hs.98612.0	gb:AI200804 /DB_XREF=gi:3753410 /DB_XREF=qf62b11.x1 /CLONE=IMAGE:1754589 /FEA=EST /CNT=9 /TID=Hs.98612.0 /TIER=Stack /STK=8 /UG=Hs.98612 /UG_TITLE=ESTs	AI200804	Hs.98612	Hs.522775	120067693	chrX:120067693-120070138 (-) // 94.81 // q24 /// chrX:120072554-120074999 (-) // 94.81 // q24 /// chrX:120077414-120079859 (-) // 94.81 // q24 /// chrX:120082275-120084720 (-) // 94.81 // q24 /// chrX:120087135-120089580 (-) // 94.81 // q24 /// chrX:120096879-120099324 (-) // 94.81 // q24 /// chrX:120101739-120104184 (-) // 94.81 // q24 /// chrX:120106599-120109044 (-) // 94.81 // q24 /// chrX:12…	cancer/testis antigen family 47, member A1 /// cancer/testis antigen family 47, member A10 /// cancer/testis antigen family 47, member A11 /// cancer/testis antigen family 47, member A2 /// cancer/testis antigen family 47, member A3 /// cancer/testis antigen family 47, member A4 /// cancer/testis antigen family 47, member A5 /// cancer/testis antigen family 47, member A6 /// cancer/testis antigen…	CT47A1 /// CT47A10 /// CT47A11 /// CT47A2 /// CT47A3 /// CT47A4 /// CT47A5 /// CT47A6 /// CT47A7 /// CT47A8 /// CT47A9
212994_at	168.571	44.7218	20.6634	Hs.16411.0	gb:BE543527 /DB_XREF=gi:9772172 /DB_XREF=601070669F1 /CLONE=IMAGE:3456857 /FEA=DNA /CNT=71 /TID=Hs.16411.0 /TIER=Stack /STK=10 /UG=Hs.16411 /LL=57187 /UG_GENE=LOC57187 /UG_TITLE=hypothetical protein LOC57187	BE543527	Hs.16411	Hs.149991	122744048	chrX:122744048-122778734 (-) // 97.24 // q25	THO complex 2	THOC2
228363_at	530.349	23.8899	21.2347	Hs.5367.0	gb:BF109251 /DB_XREF=gi:10938941 /DB_XREF=7l60e12.x1 /CLONE=IMAGE:3525982 /FEA=EST /CNT=16 /TID=Hs.5367.0 /TIER=Stack /STK=12 /UG=Hs.5367 /UG_TITLE=ESTs	BF109251	Hs.5367	Hs.356076	123046870	chrX:123046870-123047827 (+) // 53.77 // q25	X-linked inhibitor of apoptosis	XIAP
209022_at	137.861	45.9599	14.8111	Hs.8217.1	gb:AK026678.1 /DB_XREF=gi:10439584 /FEA=FLmRNA /CNT=211 /TID=Hs.8217.1 /TIER=Stack /STK=48 /UG=Hs.8217 /LL=10735 /UG_GENE=STAG2 /UG_TITLE=stromal antigen 2 /DEF=Homo sapiens cDNA: FLJ23025 fis, clone LNG01702, highly similar to HUMAUTOND Human autonomously replicating sequence (ARS) mRNA. /FL=gb:BC001765.1	AK026678	Hs.8217	Hs.496710	123095667	chrX:123095667-123236511 (+) // 97.42 // q25	stromal antigen 2	STAG2
238205_at	142.289	30.6353	18.1055	Hs.120403.0	gb:AW572906 /DB_XREF=gi:7237639 /DB_XREF=hf17c11.x1 /CLONE=IMAGE:2932148 /FEA=EST /CNT=7 /TID=Hs.120403.0 /TIER=ConsEnd /STK=7 /UG=Hs.120403 /UG_TITLE=ESTs	AW572906	Hs.120403	Hs.722246	125683367	chrX:125683367-125683810 (-) // 60.26 // q25	DDB1 and CUL4 associated factor 12-like 1	DCAF12L1
203875_at	958.288	54.4746	166.967	g4507066	gb:NM_003069.1 /DB_XREF=gi:4507066 /GEN=SMARCA1 /FEA=FLmRNA /CNT=98 /TID=Hs.152292.0 /TIER=FL+Stack /STK=28 /UG=Hs.152292 /LL=6594 /DEF=Homo sapiens SWISNF related, matrix associated, actin dependent regulator of chromatin, subfamily a, member 1 (SMARCA1), mRNA. /PROD=SWISNF related, matrix associated, actindependent regulator of chromatin, subfamily a, member 1 /FL=gb:NM_003069.1 gb:M88163.1	NM_003069	Hs.152292	Hs.152292	128580733	chrX:128580733-128652426 (-) // 96.53 // q25	SWI/SNF related, matrix associated, actin dependent regulator of chromatin, subfamily a, member 1	SMARCA1
203446_s_at	297.863	104.142	110.913	g13325071	gb:NM_000276.2 /DB_XREF=gi:13325071 /GEN=OCRL /FEA=FLmRNA /CNT=135 /TID=Hs.181060.1 /TIER=FL+Stack /STK=67 /UG=Hs.181060 /LL=4952 /DEF=Homo sapiens oculocerebrorenal syndrome of Lowe (OCRL), transcript variant a, mRNA. /PROD=phosphatidylinositol polyphosphate5-phosphatase, isoform a /FL=gb:NM_000276.2 gb:U57627.2	NM_000276	Hs.181060	Hs.126357	128674251	chrX:128674251-128726528 (+) // 98.39 // q25	oculocerebrorenal syndrome of Lowe	OCRL
205512_s_at	553.281	88.4309	124.849	g4757731	gb:NM_004208.1 /DB_XREF=gi:4757731 /GEN=PDCD8 /FEA=FLmRNA /CNT=31 /TID=Hs.18720.0 /TIER=FL /STK=0 /UG=Hs.18720 /LL=9131 /DEF=Homo sapiens programmed cell death 8 (apoptosis-inducing factor) (PDCD8), mRNA. /PROD=programmed cell death 8 (apoptosis-inducingfactor) /FL=gb:AF100928.1 gb:NM_004208.1	NM_004208	Hs.18720	Hs.424932	129263509	chrX:129263509-129299672 (-) // 99.95 // q26.1	apoptosis-inducing factor, mitochondrion-associated, 1	AIFM1
235520_at	543.16	202.831	23.1221	Hs.121668.0	gb:AA805654 /DB_XREF=gi:2874404 /DB_XREF=nz41a07.s1 /CLONE=IMAGE:1290324 /FEA=EST /CNT=10 /TID=Hs.121668.0 /TIER=ConsEnd /STK=2 /UG=Hs.121668 /UG_TITLE=ESTs	AA805654	Hs.121668	Hs.308418	129336675	chrX:129336675-129337527 (-) // 68.95 // q26.1	zinc finger protein 280C	ZNF280C
204587_at	1602.58	272.415	137.197	g6006039	gb:NM_003951.2 /DB_XREF=gi:6006039 /GEN=SLC25A14 /FEA=FLmRNA /CNT=67 /TID=Hs.194686.0 /TIER=FL+Stack /STK=29 /UG=Hs.194686 /LL=9016 /DEF=Homo sapiens solute carrier family 25 (mitochondrial carrier, brain), member 14 (SLC25A14), transcript variant long, nuclear gene encoding mitochondrial protein, mRNA. /PROD=solute carrier family 25, member 14, isoformUCP5L /FL=gb:NM_003951.2 gb:AF078544.1 gb:NM…	NM_003951	Hs.194686	Hs.194686	129474046	chrX:129474046-129507335 (+) // 99.44 // q26.1	solute carrier family 25 (mitochondrial carrier, brain), member 14	SLC25A14
204098_at	261.962	21.773	20.7906	g7706315	gb:NM_016024.1 /DB_XREF=gi:7706315 /GEN=LOC51634 /FEA=FLmRNA /CNT=70 /TID=Hs.61184.0 /TIER=FL /STK=3 /UG=Hs.61184 /LL=51634 /DEF=Homo sapiens CGI-79 protein (LOC51634), mRNA. /PROD=CGI-79 protein /FL=gb:NM_016024.1 gb:AF078865.1 gb:AF151837.1	NM_016024	Hs.61184	Hs.61184	129536228	chrX:129536228-129547628 (+) // 82.48 // q26.1	RNA binding motif protein, X-linked 2	RBMX2
32042_at	617.123	36.4485	32.9896	4864314	Cluster Incl. S72904:APK1 antigen=MAb KI recognized [human, ovarian carcinoma cell line OVCAR-3, mRNA, 2444 nt] /cds=(219,1010) /gb=S72904 /gi=633925 /ug=Hs.155185 /len=2425	S72904	Hs.155185	Hs.171458	129757874	chrX:129757874-129801675 (-) // 93.94 // q26.1	ecto-NOX disulfide-thiol exchanger 2	ENOX2
218499_at	318.865	9.11814	5.98034	g7706568	gb:NM_016542.1 /DB_XREF=gi:7706568 /GEN=LOC51765 /FEA=FLmRNA /CNT=86 /TID=Hs.23643.0 /TIER=FL+Stack /STK=22 /UG=Hs.23643 /LL=51765 /DEF=Homo sapiens serinethreonine protein kinase MASK (LOC51765), mRNA. /PROD=serinethreonine protein kinase MASK /FL=gb:NM_016542.1 gb:AB040057.1	NM_016542	Hs.23643	Hs.444247	131157428	chrX:131157428-131209971 (+) // 99.59 // q26.2	serine/threonine protein kinase MST4	MST4
233047_at	112.804	7.66146	8.71048	Hs.170776.0	gb:AL161984.1 /DB_XREF=gi:7328120 /FEA=mRNA /CNT=5 /TID=Hs.170776.0 /TIER=ConsEnd /STK=3 /UG=Hs.170776 /UG_TITLE=Homo sapiens mRNA; cDNA DKFZp762P046 (from clone DKFZp762P046) /DEF=Homo sapiens mRNA; cDNA DKFZp762P046 (from clone DKFZp762P046).	AL161984	Hs.170776	Hs.170776	131211017	chrX:131211017-131228291 (-) // 95.88 // q26.2	FERM domain containing 7	FRMD7
218669_at	140.404	27.0858	30.0289	g10880976	gb:NM_021183.1 /DB_XREF=gi:10880976 /GEN=LOC57826 /FEA=FLmRNA /CNT=74 /TID=Hs.225979.0 /TIER=FL+Stack /STK=22 /UG=Hs.225979 /LL=57826 /DEF=Homo sapiens hypothetical protein similar to small G proteins, especially RAP-2A (LOC57826), mRNA. /PROD=hypothetical protein similar to small Gproteins, especially RAP-2A /FL=gb:NM_021183.1 gb:BC003403.1	NM_021183	Hs.225979	Hs.119889	131337052	chrX:131337052-131351312 (-) // 96.81 // q26.2	RAP2C, member of RAS oncogene family	RAP2C
207385_at	316.167	93.7771	29.7974	g7706068	gb:NM_016521.1 /DB_XREF=gi:7706068 /GEN=LOC51270 /FEA=FLmRNA /CNT=5 /TID=Hs.142908.0 /TIER=FL /STK=0 /UG=Hs.142908 /LL=51270 /DEF=Homo sapiens E2F-like protein (LOC51270), mRNA. /PROD=E2F-like protein /FL=gb:NM_016521.1 gb:AF219119.1	NM_016521	Hs.142908	Hs.142908	132350696	chrX:132350696-132352376 (-) // 97.6 // q26.2	transcription factor Dp family, member 3	TFDP3
204984_at	184.884	74.2418	31.5591	g4504082	gb:NM_001448.1 /DB_XREF=gi:4504082 /GEN=GPC4 /FEA=FLmRNA /CNT=59 /TID=Hs.58367.0 /TIER=FL+Stack /STK=9 /UG=Hs.58367 /LL=2239 /DEF=Homo sapiens glypican 4 (GPC4), mRNA. /PROD=glypican 4 /FL=gb:AF030186.1 gb:NM_001448.1 gb:AF064826.1	NM_001448	Hs.58367	Hs.58367	132435063	chrX:132435063-132549205 (-) // 98.76 // q26.2	glypican 4	GPC4
209220_at	119.575	21.5301	14.7046	g1237180	gb:L47125.1 /DB_XREF=gi:1237180 /GEN=GPC3 /FEA=FLmRNA /CNT=261 /TID=Hs.119651.0 /TIER=FL+Stack /STK=33 /UG=Hs.119651 /LL=2719 /DEF=Homo sapiens (chromosome X) glypican (GPC3) mRNA, complete cds. /PROD=glypican /FL=gb:U50410.1 gb:L47125.1 gb:NM_004484.2 gb:L47176.1	L47125	Hs.119651	Hs.644108	132669911	chrX:132669911-133119627 (-) // 99.95 // q26.2	glypican 3	GPC3
1563022_at	111.024	7.49333	6.25026	Hs2.351801.1	gb:BC017958.1 /DB_XREF=gi:17389897 /TID=Hs2.351801.1 /CNT=2 /FEA=mRNA /TIER=ConsEnd /STK=0 /UG=Hs.351801 /UG_TITLE=Homo sapiens, clone IMAGE:4607409, mRNA /DEF=Homo sapiens, clone IMAGE:4607409, mRNA.	BC017958	Hs.351801	Hs.679431	133378258	chrX:133378258-133379335 (+) // 87.29 // q26.2	coiled-coil domain containing 160	CCDC160
225501_at	284.954	39.113	27.0772	Hs.106823.1	gb:AK027039.1 /DB_XREF=gi:10440054 /FEA=mRNA /CNT=83 /TID=Hs.106823.1 /TIER=Stack /STK=33 /UG=Hs.106823 /UG_TITLE=H.sapiens gene from PAC 426I6, similar to syntaxin 7 /DEF=Homo sapiens cDNA: FLJ23386 fis, clone HEP16928.	AK027039	Hs.106823	Hs.356501	133547937	chrX:133547937-133562819 (+) // 98.16 // q26.2	PHD finger protein 6	PHF6
202854_at	774.985	466.15	608.494	g4504482	gb:NM_000194.1 /DB_XREF=gi:4504482 /GEN=HPRT1 /FEA=FLmRNA /CNT=124 /TID=Hs.82314.0 /TIER=FL+Stack /STK=50 /UG=Hs.82314 /LL=3251 /DEF=Homo sapiens hypoxanthine phosphoribosyltransferase 1 (Lesch-Nyhan syndrome) (HPRT1), mRNA. /PROD=hypoxanthine phosphoribosyltransferase 1 /FL=gb:NM_000194.1 gb:BC000578.1 gb:M31642.1	NM_000194	Hs.82314	Hs.412707	133594256	chrX:133594256-133634696 (+) // 100.0 // q26.2	hypoxanthine phosphoribosyltransferase 1	HPRT1
228968_at	198.185	9.139	12.3598	Hs.28780.0	gb:AI888786 /DB_XREF=gi:5593950 /DB_XREF=wn36e06.x1 /CLONE=IMAGE:2447554 /FEA=mRNA /CNT=19 /TID=Hs.28780.0 /TIER=Stack /STK=8 /UG=Hs.28780 /UG_TITLE=Homo sapiens cDNA FLJ11216 fis, clone PLACE1008002	AI888786	Hs.28780	Hs.28780	134495237	chrX:134495237-134497189 (+) // 82.98 // q26.3	zinc finger protein 449	ZNF449
225125_at	623.339	41.1769	16.7052	Hs.110702.0	gb:BF978280 /DB_XREF=gi:12345495 /DB_XREF=602148240F1 /CLONE=IMAGE:4307192 /FEA=mRNA /CNT=98 /TID=Hs.110702.0 /TIER=Stack /STK=34 /UG=Hs.110702 /UG_TITLE=Homo sapiens mRNA; cDNA DKFZp761E212 (from clone DKFZp761E212)	BF978280	Hs.110702	Hs.110702	135044021	chrX:135044021-135057190 (-) // 89.76 // q26.3	membrane magnesium transporter 1	MMGT1
203909_at	640.618	173.588	22.6719	g5454069	gb:NM_006359.1 /DB_XREF=gi:5454069 /GEN=SLC9A6 /FEA=FLmRNA /CNT=86 /TID=Hs.62185.0 /TIER=FL+Stack /STK=41 /UG=Hs.62185 /LL=10479 /DEF=Homo sapiens solute carrier family 9 (sodiumhydrogen exchanger), isoform 6 (SLC9A6), mRNA. /PROD=solute carrier family 9 (sodiumhydrogenexchanger), isoform 6 /FL=gb:NM_006359.1 gb:AF030409.1	NM_006359	Hs.62185	Hs.62185	135067626	chrX:135067626-135129292 (+) // 99.98 // q26.3	solute carrier family 9 (sodium/hydrogen exchanger), member 6	SLC9A6
202602_s_at	1711.02	182.123	323.477	g7657636	gb:NM_014500.1 /DB_XREF=gi:7657636 /GEN=HTATSF1 /FEA=FLmRNA /CNT=142 /TID=Hs.171595.0 /TIER=FL /STK=0 /UG=Hs.171595 /LL=27336 /DEF=Homo sapiens HIV TAT specific factor 1 (HTATSF1), mRNA. /PROD=HIV TAT specific factor 1 /FL=gb:NM_014500.1 gb:U76992.1	NM_014500	Hs.171595	Hs.204475	135579786	chrX:135579786-135594501 (+) // 99.18 // q26.3	HIV-1 Tat specific factor 1	HTATSF1
209539_at	189.657	30.0812	31.9514	Hs.79307.0	gb:D25304.1 /DB_XREF=gi:435445 /GEN=KIAA0006 /FEA=FLmRNA /CNT=81 /TID=Hs.79307.0 /TIER=Stack /STK=21 /UG=Hs.79307 /LL=9459 /UG_TITLE=RacCdc42 guanine exchange factor (GEF) 6 /DEF=Human mRNA for KIAA0006 gene, partial cds. /FL=gb:D13631.1	D25304	Hs.79307	Hs.522795	135747705	chrX:135747705-135863502 (-) // 92.58 // q26.3	Rac/Cdc42 guanine nucleotide exchange factor (GEF) 6	ARHGEF6
1557195_at	114.044	3.3465	3.6813	Hs2.153652.1	gb:AL831886.1 /DB_XREF=gi:21732386 /TID=Hs2.153652.1 /CNT=10 /FEA=mRNA /TIER=ConsEnd /STK=1 /UG=Hs.153652 /UG_TITLE=Homo sapiens mRNA; cDNA DKFZp547B198 (from clone DKFZp547B198) /DEF=Homo sapiens mRNA; cDNA DKFZp547B198 (from clone DKFZp547B198).	AL831886	Hs.153652	Hs.153652	135886492	chrX:135886492-135889481 (-) // 29.12 // q26.3	---	---
205110_s_at	505.835	20.006	12.0598	g4758365	gb:NM_004114.1 /DB_XREF=gi:4758365 /GEN=FGF13 /FEA=FLmRNA /CNT=55 /TID=Hs.6540.0 /TIER=FL+Stack /STK=30 /UG=Hs.6540 /LL=2258 /DEF=Homo sapiens fibroblast growth factor 13 (FGF13), mRNA. /PROD=fibroblast growth factor 13 /FL=gb:AF100143.1 gb:NM_004114.1 gb:U66198.1	NM_004114	Hs.6540	Hs.6540	137713734	chrX:137713734-137793395 (-) // 97.59 // q26.3	fibroblast growth factor 13	FGF13
226785_at	341.109	149.047	25.6414	Hs.88252.0	gb:BF475862 /DB_XREF=gi:11546689 /DB_XREF=naa13f04.x1 /CLONE=IMAGE:3254910 /FEA=EST /CNT=38 /TID=Hs.88252.0 /TIER=Stack /STK=20 /UG=Hs.88252 /UG_TITLE=ESTs	BF475862	Hs.88252	Hs.88252	138808504	chrX:138808504-138809771 (-) // 96.64 // q27.1	ATPase, class VI, type 11C	ATP11C
217256_x_at	614.633	229.426	249.709	Hs.248094.0	gb:Z98950 /DB_XREF=gi:3036783 /FEA=DNA /CNT=1 /TID=Hs.248094.0 /TIER=ConsEnd /STK=0 /UG=Hs.248094 /UG_TITLE=Human DNA sequence from PAC 507I15 on chromosome Xq26.3-27.3. Contains 60S ribosomal protein L44 (L41, L36) like gene, ESTs, STSs and a polymorphic CA repeat /DEF=Human DNA sequence from PAC 507I15 on chromosome Xq26.3-27.3. Contains 60S ribosomal protein L44 (L41, L36) like gene, ESTs, STS…	Z98950	---	---	140232662	chrX:140232662-140233358 (+) // 100.0 // q27.1	---	---
206609_at	1185.16	112.682	33.6791	g4885474	gb:NM_005462.1 /DB_XREF=gi:4885474 /GEN=MAGEC1 /FEA=FLmRNA /CNT=21 /TID=Hs.132194.0 /TIER=FL /STK=5 /UG=Hs.132194 /LL=9947 /DEF=Homo sapiens melanoma antigen, family C, 1 (MAGEC1), mRNA. /PROD=melanoma antigen, family C, 1 /FL=gb:NM_005462.1 gb:AF056334.1	NM_005462	Hs.132194	Hs.132194	140991710	chrX:140991710-140997159 (+) // 99.55 // q27.2	melanoma antigen family C, 1	MAGEC1
220062_s_at	1265.64	277.401	54.9039	g7706604	gb:NM_016249.1 /DB_XREF=gi:7706604 /GEN=MAGEE1 /FEA=FLmRNA /CNT=39 /TID=Hs.123536.0 /TIER=FL /STK=5 /UG=Hs.123536 /LL=51438 /DEF=Homo sapiens melanoma antigen, family E, 1, cancertestis specific (MAGEE1), mRNA. /PROD=melanoma antigen, family E, 1, cancertestisspecific /FL=gb:AF151378.1 gb:NM_016249.1 gb:AF196482.1 gb:AF116194.1	NM_016249	Hs.123536	Hs.123536	141290137	chrX:141290137-141293057 (-) // 96.87 // q27.2	melanoma antigen family C, 2	MAGEC2
203689_s_at	1517.98	200.824	46.7824	Hs.89764.0	gb:AI743037 /DB_XREF=gi:5111325 /DB_XREF=wg85d05.x1 /CLONE=IMAGE:2371881 /FEA=FLmRNA /CNT=106 /TID=Hs.89764.0 /TIER=Stack /STK=13 /UG=Hs.89764 /LL=2332 /UG_GENE=FMR1 /UG_TITLE=fragile X mental retardation 1 /FL=gb:NM_002024.1	AI743037	Hs.89764	Hs.103183	146993508	chrX:146993508-147032639 (+) // 93.59 // q27.3	fragile X mental retardation 1	FMR1
202439_s_at	123.498	7.72609	8.98712	g5360215	gb:NM_000202.2 /DB_XREF=gi:5360215 /GEN=IDS /FEA=FLmRNA /CNT=157 /TID=Hs.172458.0 /TIER=FL+Stack /STK=9 /UG=Hs.172458 /LL=3423 /DEF=Homo sapiens iduronate 2-sulfatase (Hunter syndrome) (IDS), transcript variant 1, mRNA. /PROD=iduronate-2-sulfatase isoform a precursor /FL=gb:M58342.1 gb:NM_000202.2	NM_000202	Hs.172458	Hs.460960	148563757	chrX:148563757-148586966 (-) // 94.17 // q28	iduronate 2-sulfatase	IDS
214112_s_at	168.42	54.289	56.5137	Hs.82171.4	gb:AA543076 /DB_XREF=gi:2291556 /DB_XREF=nf96f02.s1 /CLONE=IMAGE:927771 /FEA=EST /CNT=14 /TID=Hs.82171.4 /TIER=Stack /STK=10 /UG=Hs.82171 /UG_TITLE=Homo sapiens (clone 115392) mRNA	AA543076	Hs.82171	Hs.534641	148623561	chrX:148623561-148628855 (+) // 83.06 // q28 /// chrX:149100414-149106616 (-) // 98.68 // q28	chromosome X open reading frame 40A /// chromosome X open reading frame 40B	CXorf40A /// CXorf40B
213511_s_at	124.3	38.813	69.3284	Hs.23200.1	gb:AI167164 /DB_XREF=gi:3700334 /DB_XREF=oo08c10.x1 /CLONE=IMAGE:1565586 /FEA=mRNA /CNT=38 /TID=Hs.23200.1 /TIER=Stack /STK=8 /UG=Hs.23200 /LL=8776 /UG_GENE=MTMR1 /UG_TITLE=myotubularin related protein 1	AI167164	Hs.23200	Hs.347187	149862012	chrX:149862012-149933575 (+) // 72.65 // q28	myotubularin related protein 1	MTMR1
225601_at	265.315	48.5738	20.964	Hs.62711.0	gb:AI806853 /DB_XREF=gi:5393419 /DB_XREF=wf36a12.x1 /CLONE=IMAGE:2357662 /FEA=EST /CNT=85 /TID=Hs.62711.0 /TIER=Stack /STK=44 /UG=Hs.62711 /UG_TITLE=ESTs	AI806853	Hs.62711	Hs.19114	150157790	chrX:150157790-150159244 (+) // 96.36 // q28	high-mobility group box 3	HMGB3
225556_at	597.062	207.799	104.82	Hs.58633.0	gb:BG290058 /DB_XREF=gi:13046471 /DB_XREF=602384825F1 /CLONE=IMAGE:4513806 /FEA=mRNA /CNT=97 /TID=Hs.58633.0 /TIER=Stack /STK=56 /UG=Hs.58633 /UG_TITLE=Homo sapiens cDNA: FLJ22145 fis, clone HEP22070	BG290058	Hs.58633	Hs.58633	150574859	chrX:150574859-150577836 (+) // 66.15 // q28	VMA21 vacuolar H+-ATPase homolog (S. cerevisiae)	VMA21
240687_at	1118.77	175.451	56.0365	Hs.160594.0	gb:AW268858 /DB_XREF=gi:6655888 /DB_XREF=xv48c09.x1 /CLONE=IMAGE:2816368 /FEA=EST /CNT=5 /TID=Hs.160594.0 /TIER=ConsEnd /STK=4 /UG=Hs.160594 /UG_TITLE=ESTs	AW268858	Hs.160594	Hs.160594	150840916	chrX:150840916-150845209 (+) // 97.7 // q28	PAS domain containing 1	PASD1
214254_at	1046.34	92.0667	21.7169	Hs.37107.0	gb:AW438674 /DB_XREF=gi:6973980 /DB_XREF=xt02b04.x1 /CLONE=IMAGE:2777935 /FEA=FLmRNA /CNT=30 /TID=Hs.37107.0 /TIER=Stack /STK=9 /UG=Hs.37107 /LL=4103 /UG_GENE=MAGEA4 /UG_TITLE=melanoma antigen, family A, 4 /FL=gb:U10340.1 gb:D32075.1 gb:D32077.1 gb:NM_002362.1	AW438674	Hs.37107	Hs.37107	151080980	chrX:151080980-151093642 (+) // 97.59 // q28	melanoma antigen family A, 4	MAGEA4
209942_x_at	1469.55	323.393	100.069	g12653144	gb:BC000340.1 /DB_XREF=gi:12653144 /FEA=FLmRNA /CNT=77 /TID=Hs.36978.0 /TIER=FL /STK=7 /UG=Hs.36978 /LL=4102 /UG_GENE=MAGEA3 /DEF=Homo sapiens, melanoma antigen, family A, 3, clone MGC:8564, mRNA, complete cds. /PROD=melanoma antigen, family A, 3 /FL=gb:BC000340.1 gb:NM_005362.1	BC000340	Hs.36978	Hs.417816	151867264	chrX:151867264-151870814 (+) // 96.84 // q28 /// chrX:151934662-151938205 (-) // 98.19 // q28	melanoma antigen family A, 3	MAGEA3
214612_x_at	2210.63	517.755	108.934	Hs.278460.0	gb:U10691 /DB_XREF=gi:533522 /FEA=FLmRNA /CNT=14 /TID=Hs.278460.0 /TIER=ConsEnd /STK=0 /UG=Hs.278460 /LL=4105 /UG_GENE=MAGEA6 /UG_TITLE=melanoma antigen, family A, 6 /DEF=Human MAGE-6 antigen (MAGE6) gene, complete cds /FL=gb:U10339.1 gb:D32076.1 gb:NM_005363.1	U10691	Hs.278460	Hs.441113	151869113	chrX:151869113-151870809 (+) // 99.51 // q28 /// chrX:151934667-151936363 (-) // 98.14 // q28	melanoma antigen family A, 6	MAGEA6
214603_at	1033.79	97.167	21.1752	Hs.36980.0	gb:U82671 /DB_XREF=gi:7280331 /FEA=FLmRNA /CNT=18 /TID=Hs.36980.0 /TIER=ConsEnd /STK=4 /UG=Hs.36980 /LL=4101 /UG_GENE=MAGEA2 /UG_TITLE=melanoma antigen, family A, 2 /DEF=Homo sapiens chromosome Xq28 melanoma antigen family A2a (MAGEA2A), melanoma antigen family A12 (MAGEA12), melanoma antigen family A2b (MAGEA2B), melanoma antigen family A3 (MAGEA3), caltractin (CALT), NAD(P)H dehydrogenase-like …	U82671	Hs.36980	Hs.713061	151883152	chrX:151883152-151887096 (+) // 100.0 // q28 /// chrX:151918386-151922330 (-) // 100.0 // q28	melanoma antigen family A, 2 /// melanoma antigen family A, 2B	MAGEA2 /// MAGEA2B
210467_x_at	437.624	97.6038	22.2141	g13097311	gb:BC003408.1 /DB_XREF=gi:13097311 /FEA=FLmRNA /CNT=13 /TID=Hs.169246.0 /TIER=FL /STK=0 /UG=Hs.169246 /LL=4111 /UG_GENE=MAGEA12 /DEF=Homo sapiens, melanoma antigen, family A, 12, clone MGC:4914, mRNA, complete cds. /PROD=melanoma antigen, family A, 12 /FL=gb:NM_005367.1 gb:BC003408.1	BC003408	Hs.169246	Hs.169246	151899294	chrX:151899294-151903172 (-) // 98.27 // q28	melanoma antigen family A, 12	MAGEA12
220445_s_at	216.848	53.1304	27.5932	g4759255	gb:NM_004909.1 /DB_XREF=gi:4759255 /GEN=TRAG3 /FEA=FLmRNA /CNT=7 /TID=Hs.251377.0 /TIER=FL /STK=2 /UG=Hs.251377 /LL=9598 /DEF=Homo sapiens taxol resistance associated gene 3 (TRAG3), mRNA. /PROD=taxol resistance associated gene 3 /FL=gb:AF080246.1 gb:NM_004909.1	NM_004909	Hs.251377	Hs.721609	151927733	chrX:151927733-151928730 (+) // 61.45 // q28 /// chrX:151908518-151909511 (+) // 59.45 // q28 /// chrX:151876750-151877747 (-) // 61.45 // q28 /// chrX:151895979-151896975 (-) // 58.7 // q28	CSAG family, member 2 /// CSAG family, member 3	CSAG2 /// CSAG3
209194_at	469.379	261.596	360.755	g13529121	gb:BC005334.1 /DB_XREF=gi:13529121 /FEA=FLmRNA /CNT=143 /TID=Hs.82794.0 /TIER=FL /STK=1 /UG=Hs.82794 /LL=1069 /UG_GENE=CETN2 /DEF=Homo sapiens, centrin, EF-hand protein, 2, clone MGC:12421, mRNA, complete cds. /PROD=centrin, EF-hand protein, 2 /FL=gb:NM_004344.1 gb:BC005334.1	BC005334	Hs.82794	Hs.82794	151995933	chrX:151995933-151999301 (-) // 97.13 // q28	centrin, EF-hand protein, 2	CETN2
215093_at	187.703	33.5752	37.3312	Hs.57698.1	gb:U82671 /DB_XREF=gi:7280331 /FEA=DNA_9 /CNT=6 /TID=Hs.57698.1 /TIER=ConsEnd /STK=0 /UG=Hs.57698 /LL=50814 /UG_GENE=H105E3 /UG_TITLE=NAD(P) dependent steroid dehydrogenase-like; H105e3 /DEF=Homo sapiens chromosome Xq28 melanoma antigen family A2a (MAGEA2A), melanoma antigen family A12 (MAGEA12), melanoma antigen family A2b (MAGEA2B), melanoma antigen family A3 (MAGEA3), caltractin (CALT), NAD(P)…	U82671	Hs.57698	Hs.57698	151999510	chrX:151999510-152037905 (+) // 93.51 // q28	NAD(P) dependent steroid dehydrogenase-like	NSDHL
203585_at	193.696	73.3847	36.074	g6005971	gb:NM_007150.1 /DB_XREF=gi:6005971 /GEN=ZNF185 /FEA=FLmRNA /CNT=94 /TID=Hs.16622.0 /TIER=FL+Stack /STK=40 /UG=Hs.16622 /LL=7739 /DEF=Homo sapiens zinc finger protein 185 (LIM domain) (ZNF185), mRNA. /PROD=zinc finger protein 185 (LIM domain) /FL=gb:NM_007150.1	NM_007150	Hs.16622	Hs.16622	152086664	chrX:152086664-152142005 (+) // 91.28 // q28	zinc finger protein 185 (LIM domain)	ZNF185
207325_x_at	321.281	109.364	40.1339	g4826821	gb:NM_004988.1 /DB_XREF=gi:4826821 /GEN=MAGEA1 /FEA=FLmRNA /CNT=6 /TID=Hs.72879.0 /TIER=FL /STK=1 /UG=Hs.72879 /LL=4100 /DEF=Homo sapiens melanoma antigen, family A, 1 (directs expression of antigen MZ2-E) (MAGEA1), mRNA. /PROD=melanoma antigen, family A, 1 (directsexpression of antigen MZ2-E) /FL=gb:NM_004988.1	NM_004988	Hs.72879	Hs.72879	152481524	chrX:152481524-152483223 (-) // 100.0 // q28	melanoma antigen family A, 1 (directs expression of antigen MZ2-E)	MAGEA1
213334_x_at	150.047	66.7352	29.2614	Hs.6487.2	gb:BE676218 /DB_XREF=gi:10036759 /DB_XREF=7f25d10.x1 /CLONE=IMAGE:3295699 /FEA=mRNA /CNT=47 /TID=Hs.6487.2 /TIER=Stack /STK=37 /UG=Hs.6487 /LL=55559 /UG_GENE=HSXQ28ORF /UG_TITLE=Xq28, 2000bp sequence contg. ORF	BE676218	Hs.6487	Hs.170835	152713127	chrX:152713127-152730496 (-) // 52.12 // q28	HAUS augmin-like complex, subunit 7	HAUS7
203025_at	103.894	39.8598	53.7725	g10835056	gb:NM_003491.1 /DB_XREF=gi:10835056 /GEN=ARD1 /FEA=FLmRNA /CNT=124 /TID=Hs.333034.0 /TIER=FL+Stack /STK=54 /UG=Hs.333034 /LL=8260 /DEF=Homo sapiens N-acetyltransferase, homolog of S. cerevisiae ARD1 (ARD1), mRNA. /PROD=N-acetyltransferase, homolog of S. cerevisiaeARD1 /FL=gb:BC000308.1 gb:NM_003491.1	NM_003491	Hs.333034	Hs.433291	153195378	chrX:153195378-153200454 (-) // 100.0 // q28	N(alpha)-acetyltransferase 10, NatA catalytic subunit	NAA10
201587_s_at	281.88	102.886	110.387	g4755143	gb:NM_001569.2 /DB_XREF=gi:4755143 /GEN=IRAK1 /FEA=FLmRNA /CNT=321 /TID=Hs.182018.0 /TIER=FL+Stack /STK=112 /UG=Hs.182018 /LL=3654 /DEF=Homo sapiens interleukin-1 receptor-associated kinase 1 (IRAK1), mRNA. /PROD=interleukin-1 receptor-associated kinase 1 /FL=gb:L76191.1 gb:NM_001569.2	NM_001569	Hs.182018	Hs.522819	153275961	chrX:153275961-153285342 (-) // 87.8 // q28	interleukin-1 receptor-associated kinase 1	IRAK1
202618_s_at	119.574	27.58	37.3436	g972764	gb:L37298.1 /DB_XREF=gi:972764 /GEN=MeCP-2 /FEA=FLmRNA /CNT=142 /TID=Hs.3239.0 /TIER=FL /STK=7 /UG=Hs.3239 /LL=4204 /DEF=Homo sapiens methyl-CpG-binding protein (MeCP-2) mRNA, complete cds. /PROD=methyl-CpG-binding protein /FL=gb:NM_004992.2 gb:L37298.1 gb:AF158180.1	L37298	Hs.3239	Hs.200716	153295690	chrX:153295690-153357742 (-) // 98.26 // q28	methyl CpG binding protein 2 (Rett syndrome)	MECP2
201864_at	1896.21	700.979	433.063	g4503970	gb:NM_001493.1 /DB_XREF=gi:4503970 /GEN=GDI1 /FEA=FLmRNA /CNT=209 /TID=Hs.74576.0 /TIER=FL+Stack /STK=142 /UG=Hs.74576 /LL=2664 /DEF=Homo sapiens GDP dissociation inhibitor 1 (GDI1), mRNA. /PROD=GDP dissociation inhibitor 1 /FL=gb:BC000317.1 gb:NM_001493.1 gb:D45021.1	NM_001493	Hs.74576	Hs.74576	153665520	chrX:153665520-153671812 (+) // 98.11 // q28	GDP dissociation inhibitor 1	GDI1
203262_s_at	123.756	41.7924	41.3175	g4758219	gb:NM_004699.1 /DB_XREF=gi:4758219 /GEN=DXS9928E /FEA=FLmRNA /CNT=104 /TID=Hs.54277.0 /TIER=FL+Stack /STK=54 /UG=Hs.54277 /LL=9130 /DEF=Homo sapiens DNA segment on chromosome X (unique) 9928 expressed sequence (DXS9928E), mRNA. /PROD=XAP-5 protein /FL=gb:D83260.1 gb:AD001530.1 gb:NM_004699.1 gb:BC000028.1	NM_004699	Hs.54277	Hs.54277	153672507	chrX:153672507-153678996 (+) // 91.38 // q28	family with sequence similarity 50, member A	FAM50A
201479_at	1214.87	196.36	148.671	g4503336	gb:NM_001363.1 /DB_XREF=gi:4503336 /GEN=DKC1 /FEA=FLmRNA /CNT=276 /TID=Hs.4747.0 /TIER=FL+Stack /STK=44 /UG=Hs.4747 /LL=1736 /DEF=Homo sapiens dyskeratosis congenita 1, dyskerin (DKC1), mRNA. /PROD=dyskeratosis congenita 1, dyskerin /FL=gb:NM_001363.1 gb:AF067008.1 gb:U59151.1	NM_001363	Hs.4747	Hs.4747	153991180	chrX:153991180-154005959 (+) // 97.52 // q28	dyskeratosis congenita 1, dyskerin	DKC1
202974_at	100.776	22.4636	49.7836	g6006024	gb:NM_002436.2 /DB_XREF=gi:6006024 /GEN=MPP1 /FEA=FLmRNA /CNT=176 /TID=Hs.1861.0 /TIER=FL+Stack /STK=78 /UG=Hs.1861 /LL=4354 /DEF=Homo sapiens membrane protein, palmitoylated 1 (55kD) (MPP1), mRNA. /PROD=palmitoylated membrane protein 1 /FL=gb:BC002392.1 gb:NM_002436.2 gb:M64925.1	NM_002436	Hs.1861	Hs.496984	154006967	chrX:154006967-154033763 (-) // 99.95 // q28	membrane protein, palmitoylated 1, 55kDa	MPP1
201472_at	610.2	232.789	93.7991	g9257253	gb:NM_003372.2 /DB_XREF=gi:9257253 /GEN=VBP1 /FEA=FLmRNA /CNT=310 /TID=Hs.198307.0 /TIER=FL+Stack /STK=103 /UG=Hs.198307 /LL=7411 /DEF=Homo sapiens von Hippel-Lindau binding protein 1 (VBP1), mRNA. /PROD=von Hippel-Lindau binding protein 1 /FL=gb:NM_003372.2 gb:U96759.1	NM_003372	Hs.198307	Hs.436803	154444549	chrX:154444549-154468096 (+) // 94.75 // q28	von Hippel-Lindau binding protein 1	VBP1

## Sheet: GroupB
Probe Set ID	SG	PS	RS	Transcript ID(Array Design)	Target Description	Representative Public ID	Archival UniGene Cluster	UniGene ID	Location on X	Alignment	Gene Title	Gene Symbol
203569_s_at	1373.96	418.561	947.726	g4503178	gb:NM_003611.1 /DB_XREF=gi:4503178 /GEN=CXORF5 /FEA=FLmRNA /CNT=107 /TID=Hs.6483.0 /TIER=FL+Stack /STK=12 /UG=Hs.6483 /LL=8481 /DEF=Homo sapiens chromosome X open reading frame 5 (CXORF5), mRNA. /PROD=chromosome X open reading frame 5 /FL=gb:NM_003611.1	NM_003611	Hs.6483	Hs.6483	13752879	chrX:13752879-13787470 (+) // 99.39 // p22.2	oral-facial-digital syndrome 1	OFD1
210592_s_at	599.729	68.0961	444.506	g338335	gb:M55580.1 /DB_XREF=gi:338335 /GEN=spermidinespermine N1-acetyltransferase /FEA=FLmRNA /CNT=8 /TID=Hs.28491.1 /TIER=FL /STK=0 /UG=Hs.28491 /LL=6303 /DEF=Human spermidinespermine N1-acetyltransferase mRNA, complete cds. /PROD=spermidinespermine N1-acetyltransferase /FL=gb:M55580.1	M55580	Hs.28491	Hs.28491	23801463	chrX:23801463-23804123 (+) // 68.61 // p22.11	spermidine/spermine N1-acetyltransferase 1	SAT1
227357_at	227.319	14.9853	126.436	Hs.135055.0	gb:BF593914 /DB_XREF=gi:11686238 /DB_XREF=nab48b12.x1 /CLONE=IMAGE:3268966 /FEA=EST /CNT=30 /TID=Hs.135055.0 /TIER=Stack /STK=14 /UG=Hs.135055 /UG_TITLE=ESTs	BF593914	Hs.135055	Hs.188256	30845559	chrX:30845559-30847015 (-) // 98.84 // p21.2	TGF-beta activated kinase 1/MAP3K7 binding protein 3	TAB3
219855_at	507.456	92.3943	385.235	g8922558	gb:NM_018159.1 /DB_XREF=gi:8922558 /GEN=FLJ10628 /FEA=FLmRNA /CNT=31 /TID=Hs.200016.0 /TIER=FL /STK=6 /UG=Hs.200016 /LL=55190 /DEF=Homo sapiens hypothetical protein FLJ10628 (FLJ10628), mRNA. /PROD=hypothetical protein FLJ10628 /FL=gb:NM_018159.1	NM_018159	Hs.200016	Hs.200016	51232863	chrX:51232863-51239360 (-) // 76.47 // p11.22	nudix (nucleoside diphosphate linked moiety X)-type motif 11	NUDT11
209014_at	483.097	126.084	559.232	g9963809	gb:AF217963.1 /DB_XREF=gi:9963809 /FEA=FLmRNA /CNT=221 /TID=Hs.177556.0 /TIER=FL+Stack /STK=127 /UG=Hs.177556 /LL=9500 /UG_GENE=MAGED1 /DEF=Homo sapiens NRAGE mRNA, complete cds. /PROD=NRAGE /FL=gb:NM_006986.1 gb:AF132205.1 gb:AF124440.1 gb:AF217963.1	AF217963	Hs.177556	Hs.5258	51636753	chrX:51636753-51645448 (+) // 93.95 // p11.22	melanoma antigen family D, 1	MAGED1
202282_at	105.626	65.9143	95.5443	g4758503	gb:NM_004493.1 /DB_XREF=gi:4758503 /GEN=HADH2 /FEA=FLmRNA /CNT=202 /TID=Hs.171280.0 /TIER=FL+Stack /STK=80 /UG=Hs.171280 /LL=3028 /DEF=Homo sapiens hydroxyacyl-Coenzyme A dehydrogenase, type II (HADH2), mRNA. /PROD=hydroxyacyl-Coenzyme A dehydrogenase, type II /FL=gb:BC000829.1 gb:U96132.1 gb:U73514.1 gb:BC000372.1 gb:NM_004493.1 gb:AF035555.1 gb:AF069134.1	NM_004493	Hs.171280	Hs.171280	53458209	chrX:53458209-53461320 (-) // 96.46 // p11.22	hydroxysteroid (17-beta) dehydrogenase 10	HSD17B10
202105_at	662.222	226.921	480.171	g4557662	gb:NM_001551.1 /DB_XREF=gi:4557662 /GEN=IGBP1 /FEA=FLmRNA /CNT=165 /TID=Hs.3631.0 /TIER=FL /STK=2 /UG=Hs.3631 /LL=3476 /DEF=Homo sapiens immunoglobulin (CD79A) binding protein 1 (IGBP1), mRNA. /PROD=immunoglobulin-binding protein 1 /FL=gb:BC004137.1 gb:NM_001551.1	NM_001551	Hs.3631	Hs.496267	69353790	chrX:69353790-69386125 (+) // 99.92 // q13.1	immunoglobulin (CD79A) binding protein 1	IGBP1
204749_at	105.236	21.9719	69.5933	g4758757	gb:NM_004538.1 /DB_XREF=gi:4758757 /GEN=NAP1L3 /FEA=FLmRNA /CNT=71 /TID=Hs.21365.0 /TIER=FL+Stack /STK=32 /UG=Hs.21365 /LL=4675 /DEF=Homo sapiens nucleosome assembly protein 1-like 3 (NAP1L3), mRNA. /PROD=nucleosome assembly protein 1-like 3 /FL=gb:NM_004538.1 gb:D50370.1	NM_004538	Hs.21365	Hs.21365	92925933	chrX:92925933-92928567 (-) // 90.1 // q21.32	nucleosome assembly protein 1-like 3	NAP1L3
239481_at	124.232	39.2237	122.04	Hs.110069.0	gb:AI864183 /DB_XREF=gi:5528290 /DB_XREF=wg77a02.x1 /CLONE=IMAGE:2371082 /FEA=EST /CNT=9 /TID=Hs.110069.0 /TIER=ConsEnd /STK=1 /UG=Hs.110069 /UG_TITLE=ESTs, Weakly similar to CARS-Cyp (H.sapiens)	AI864183	Hs.110069	Hs.110069	92929221	chrX:92929221-92965038 (+) // 86.87 // q21.32	family with sequence similarity 133, member A	FAM133A
205726_at	105.954	12.8173	99.8962	g5803002	gb:NM_006729.1 /DB_XREF=gi:5803002 /GEN=DIAPH2 /FEA=FLmRNA /CNT=39 /TID=Hs.226483.0 /TIER=FL+Stack /STK=28 /UG=Hs.226483 /LL=1730 /DEF=Homo sapiens diaphanous (Drosophila, homolog) 2 (DIAPH2), transcript variant 156, mRNA. /PROD=diaphanous 2 isoform 156 /FL=gb:NM_006729.1	NM_006729	Hs.226483	Hs.226483	95939710	chrX:95939710-96859992 (+) // 70.9 // q21.33	diaphanous homolog 2 (Drosophila)	DIAPH2
220325_at	187.283	113.618	243.79	g13376332	gb:NM_024885.1 /DB_XREF=gi:13376332 /GEN=TAF2Q /FEA=FLmRNA /CNT=18 /TID=Hs.223806.0 /TIER=FL /STK=0 /UG=Hs.223806 /LL=79945 /DEF=Homo sapiens TATA box binding protein (TBP)-associated factor, RNA polymerase II, Q (TAF2Q), mRNA. /PROD=hypothetical protein FLJ23157 /FL=gb:NM_024885.1	NM_024885	Hs.223806	Hs.223806	100523247	chrX:100523247-100542793 (-) // 92.63 // q22.1	TAF7-like RNA polymerase II, TATA box binding protein (TBP)-associated factor, 50kDa	TAF7L
211276_at	154.932	24.6251	285.135	g12002041	gb:AF063606.1 /DB_XREF=gi:12002041 /FEA=FLmRNA /CNT=1 /TID=Hs.17481.0 /TIER=FL /STK=0 /UG=Hs.17481 /DEF=Homo sapiens brain my048 protein mRNA, complete cds. /PROD=brain my048 protein /FL=gb:AF063606.1	AF063606	Hs.17481	Hs.401835	101380709	chrX:101380709-101382683 (+) // 59.85 // q22.1	transcription elongation factor A (SII)-like 2	TCEAL2
218332_at	352.891	112.345	854.483	g8923715	gb:NM_018476.1 /DB_XREF=gi:8923715 /GEN=HBEX2 /FEA=FLmRNA /CNT=116 /TID=Hs.283719.0 /TIER=FL+Stack /STK=54 /UG=Hs.283719 /LL=55859 /DEF=Homo sapiens uncharacterized hypothalamus protein HBEX2 (HBEX2), mRNA. /PROD=uncharacterized hypothalamus protein HBEX2 /FL=gb:AF220189.1 gb:NM_018476.1 gb:AF237783.1 gb:AF183416.1	NM_018476	Hs.283719	Hs.334370	102317580	chrX:102317580-102319081 (-) // 79.71 // q22.1	brain expressed, X-linked 1	BEX1
224367_at	263.439	64.2796	241.799	g13625167	gb:AF251053.1 /DB_XREF=gi:13625167 /FEA=FLmRNA /CNT=1 /TID=HsAffx.900523.838 /TIER=FL /STK=0 /DEF=Homo sapiens X-linked protein mRNA, complete cds. /PROD=X-linked protein /FL=gb:AF251053.1	AF251053	Hs.900523	Hs.398989	102564274	chrX:102564274-102565806 (-) // 86.96 // q22.1	brain expressed X-linked 2	BEX2
215997_s_at	805.494	145.894	728.856	Hs.155976.2	gb:AV694732 /DB_XREF=gi:10296595 /DB_XREF=AV694732 /CLONE=GKCGZH06 /FEA=DNA_1 /CNT=3 /TID=Hs.155976.2 /TIER=ConsEnd /STK=0 /UG=Hs.155976 /LL=8450 /UG_GENE=CUL4B /UG_TITLE=cullin 4B	AV694732	Hs.155976	Hs.102914	119660507	chrX:119660507-119688811 (-) // 92.2 // q24	cullin 4B	CUL4B
219576_at	170.181	110.489	290.029	g13376106	gb:NM_024765.1 /DB_XREF=gi:13376106 /GEN=FLJ12401 /FEA=FLmRNA /CNT=24 /TID=Hs.132221.0 /TIER=FL /STK=0 /UG=Hs.132221 /LL=79821 /DEF=Homo sapiens hypothetical protein FLJ12401 (FLJ12401), mRNA. /PROD=hypothetical protein FLJ12401 /FL=gb:NM_024765.1	NM_024765	Hs.132221	Hs.446275	135310837	chrX:135310837-135323438 (-) // 82.74 // q26.3	MAP7 domain containing 3	MAP7D3
202474_s_at	178.822	107.399	148.333	g4885402	gb:NM_005334.1 /DB_XREF=gi:4885402 /GEN=HCFC1 /FEA=FLmRNA /CNT=143 /TID=Hs.83634.0 /TIER=FL+Stack /STK=21 /UG=Hs.83634 /LL=3054 /DEF=Homo sapiens host cell factor C1 (VP16-accessory protein) (HCFC1), mRNA. /PROD=host cell factor C1 (VP16-accessory protein) /FL=gb:NM_005334.1	NM_005334	Hs.83634	Hs.83634	153213007	chrX:153213007-153230177 (-) // 96.99 // q28	host cell factor C1 (VP16-accessory protein)	HCFC1

## Sheet: GroupC
Probe Set ID	SG	PS	RS	Transcript ID(Array Design)	Target Description	Representative Public ID	Archival UniGene Cluster	UniGene ID	Location on X	Alignment	Gene Title	Gene Symbol
216539_at	52.0316	37.9909	1013.39	Hs.302079.0	gb:AB050195.1 /DB_XREF=gi:11559487 /FEA=mRNA /CNT=1 /TID=Hs.302079.0 /TIER=ConsEnd /STK=1 /UG=Hs.302079 /UG_TITLE=Homo sapiens mRNA, partial cds, clone:H2-5, MJD homolog /DEF=Homo sapiens mRNA, partial cds, clone:H2-5, MJD homolog.	AB050195	Hs.302079	Hs.382641	13336769	chrX:13336769-13338026 (-) // 98.9 // p22.2	ataxin 3-like	ATXN3L
225154_at	74.9995	416.85	1346.51	Hs.47334.0	gb:BG029566 /DB_XREF=gi:12418662 /DB_XREF=602296736F1 /CLONE=IMAGE:4391097 /FEA=mRNA /CNT=96 /TID=Hs.47334.0 /TIER=Stack /STK=16 /UG=Hs.47334 /UG_TITLE=Homo sapiens, clone IMAGE:3138746, mRNA, partial cds	BG029566	Hs.47334	Hs.489336	16737731	chrX:16737731-16779333 (+) // 85.84 // p22.2	synapse associated protein 1	SYAP1
206575_at	16.4001	37.5825	204.514	g4507280	gb:NM_003159.1 /DB_XREF=gi:4507280 /GEN=STK9 /FEA=FLmRNA /CNT=14 /TID=Hs.50905.0 /TIER=FL /STK=1 /UG=Hs.50905 /LL=6792 /DEF=Homo sapiens serinethreonine kinase 9 (STK9), mRNA. /PROD=serinethreonine kinase 9 /FL=gb:NM_003159.1	NM_003159	Hs.50905	Hs.659851	18443756	chrX:18443756-18671745 (+) // 97.41 // p22.13	cyclin-dependent kinase-like 5	CDKL5
206547_s_at	55.3226	162.439	1086.38	g5453941	gb:NM_006240.1 /DB_XREF=gi:5453941 /GEN=PPEF1 /FEA=FLmRNA /CNT=21 /TID=Hs.211589.0 /TIER=FL /STK=5 /UG=Hs.211589 /LL=5475 /DEF=Homo sapiens protein phosphatase, EF hand calcium-binding domain 1 (PPEF1), mRNA. /PROD=protein phosphatase, EF hand calcium-bindingdomain 1 /FL=gb:NM_006240.1 gb:AF023455.1	NM_006240	Hs.211589	Hs.211589	18709044	chrX:18709044-18846032 (+) // 99.79 // p22.13	protein phosphatase, EF-hand calcium binding domain 1	PPEF1
206751_s_at	12.5661	128.805	734.864	g4758889	gb:NM_004845.1 /DB_XREF=gi:4758889 /GEN=PCYT1B /FEA=FLmRNA /CNT=8 /TID=Hs.132794.0 /TIER=FL /STK=0 /UG=Hs.132794 /LL=9468 /DEF=Homo sapiens phosphate cytidylyltransferase 1, choline, beta isoform (PCYT1B), mRNA. /PROD=phosphate cytidylyltransferase 1, choline, betaisoform /FL=gb:AF052510.1 gb:NM_004845.1	NM_004845	Hs.132794	Hs.660708	24579959	chrX:24579959-24665275 (-) // 97.8 // p22.11	phosphate cytidylyltransferase 1, choline, beta	PCYT1B
206645_s_at	35.7816	20.0367	157.035	g5016089	gb:NM_000475.2 /DB_XREF=gi:5016089 /GEN=NR0B1 /FEA=FLmRNA /CNT=20 /TID=Hs.268490.0 /TIER=FL /STK=0 /UG=Hs.268490 /LL=190 /DEF=Homo sapiens nuclear receptor subfamily 0, group B, member 1 (NR0B1), mRNA. /PROD=adrenal hypoplasia protein /FL=gb:NM_000475.2	NM_000475	Hs.268490	Hs.268490	30322463	chrX:30322463-30327480 (-) // 96.62 // p21.2	nuclear receptor subfamily 0, group B, member 1	NR0B1
240426_at	5.72727	314.613	838.193	Hs.197801.0	gb:AL043093 /DB_XREF=gi:5935723 /DB_XREF=DKFZp434C1423_s1 /CLONE=DKFZp434C1423 /FEA=EST /CNT=4 /TID=Hs.197801.0 /TIER=ConsEnd /STK=4 /UG=Hs.197801 /UG_TITLE=ESTs	AL043093	Hs.197801	Hs.197801	34962361	chrX:34962361-34963032 (+) // 96.79 // p21.1	family with sequence similarity 47, member B	FAM47B
215142_at	13.4905	305.785	3742.79	Hs.122959.0	gb:AA815276 /DB_XREF=gi:2884872 /DB_XREF=ai59a01.s1 /CLONE=1375080 /FEA=mRNA /CNT=8 /TID=Hs.122959.0 /TIER=ConsEnd /STK=5 /UG=Hs.122959 /LL=25763 /UG_GENE=HYPM /UG_TITLE=Huntingtin interacting protein M	AA815276	Hs.122959	Hs.122959	37850069	chrX:37850069-37850567 (+) // 94.68 // p11.4	chromosome X open reading frame 27	CXorf27
218251_at	16.4308	34.7416	180.91	g10864050	gb:NM_021242.1 /DB_XREF=gi:10864050 /GEN=STRAIT11499 /FEA=FLmRNA /CNT=121 /TID=Hs.236556.0 /TIER=FL+Stack /STK=40 /UG=Hs.236556 /LL=58526 /DEF=Homo sapiens hypothetical protein STRAIT11499 (STRAIT11499), mRNA. /PROD=hypothetical protein STRAIT11499 /FL=gb:NM_021242.1	NM_021242	Hs.236556	Hs.522605	38663471	chrX:38663471-38665696 (+) // 97.49 // p11.4	MID1 interacting protein 1 (gastrulation specific G12 homolog (zebrafish))	MID1IP1
207377_at	118.238	939.372	2200.55	g13376811	gb:NM_025210.1 /DB_XREF=gi:13376811 /GEN=I-4 /FEA=FLmRNA /CNT=5 /TID=Hs.127689.0 /TIER=FL /STK=0 /UG=Hs.127689 /LL=80316 /DEF=Homo sapiens type 1 protein phosphatase inhibitor (I-4), mRNA. /PROD=type 1 protein phosphatase inhibitor /FL=gb:NM_025210.1 gb:AB044137.1	NM_025210	Hs.127689	Hs.127689	42636618	chrX:42636618-42637486 (-) // 97.09 // p11.3	protein phosphatase 1, regulatory (inhibitor) subunit 2 pseudogene 9	PPP1R2P9
204389_at	37.4418	47.9432	189.491	g4557734	gb:NM_000240.1 /DB_XREF=gi:4557734 /GEN=MAOA /FEA=FLmRNA /CNT=88 /TID=Hs.183109.0 /TIER=FL+Stack /STK=33 /UG=Hs.183109 /LL=4128 /DEF=Homo sapiens monoamine oxidase A (MAOA), nuclear gene encoding mitochondrial protein, mRNA. /PROD=monoamine oxidase A /FL=gb:M68840.1 gb:M69226.1 gb:NM_000240.1	NM_000240	Hs.183109	Hs.183109	43515581	chrX:43515581-43604057 (+) // 98.03 // p11.3	monoamine oxidase A	MAOA
220515_at	10.7732	145.436	2035.96	g11545790	gb:NM_022076.1 /DB_XREF=gi:11545790 /GEN=LOC63904 /FEA=FLmRNA /CNT=10 /TID=Hs.15572.0 /TIER=FL /STK=6 /UG=Hs.15572 /LL=63904 /DEF=Homo sapiens hypothetical protein IMAGE 109914 (LOC63904), mRNA. /PROD=hypothetical protein IMAGE 109914 /FL=gb:NM_022076.1	NM_022076	Hs.15572	Hs.534478	44703249	chrX:44703249-44704132 (+) // 99.1 // p11.3	dual specificity phosphatase 21	DUSP21
200964_at	702.989	587.596	1685.16	g4507762	gb:NM_003334.1 /DB_XREF=gi:4507762 /GEN=UBE1 /FEA=FLmRNA /CNT=316 /TID=Hs.2055.0 /TIER=FL+Stack /STK=181 /UG=Hs.2055 /LL=7317 /DEF=Homo sapiens ubiquitin-activating enzyme E1 (A1S9T and BN75 temperature sensitivity complementing) (UBE1), mRNA. /PROD=ubiquitin-activating enzyme E1 (A1S9T and BN75temperature sensitivity complementing) /FL=gb:NM_003334.1 gb:M58028.1	NM_003334	Hs.2055	Hs.533273	47053391	chrX:47053391-47074526 (+) // 99.59 // p11.23	ubiquitin-like modifier activating enzyme 1	UBA1
207239_s_at	98.6056	134.284	847.721	g5453859	gb:NM_006201.1 /DB_XREF=gi:5453859 /GEN=PCTK1 /FEA=FLmRNA /CNT=5 /TID=Hs.171834.0 /TIER=FL /STK=0 /UG=Hs.171834 /LL=5127 /DEF=Homo sapiens PCTAIRE protein kinase 1 (PCTK1), mRNA. /PROD=PCTAIRE protein kinase 1 /FL=gb:NM_006201.1	NM_006201	Hs.171834	Hs.496068	47078466	chrX:47078466-47088298 (+) // 94.84 // p11.23	cyclin-dependent kinase 16	CDK16
213937_s_at	28.8504	113.307	357.461	Hs.23170.2	gb:AV723177 /DB_XREF=gi:10826357 /DB_XREF=AV723177 /CLONE=HTBBUC07 /FEA=EST /CNT=18 /TID=Hs.23170.2 /TIER=Stack /STK=15 /UG=Hs.23170 /LL=24140 /UG_GENE=JM23 /UG_TITLE=homolog of yeast SPB1	AV723177	Hs.23170	Hs.23170	48334623	chrX:48334623-48341339 (+) // 98.12 // p11.23	FtsJ homolog 1 (E. coli)	FTSJ1
226173_at	20.4775	114.634	398.982	Hs.30619.0	gb:AF196969 /DB_XREF=gi:6289073 /FEA=DNA_3 /CNT=53 /TID=Hs.30619.0 /TIER=Stack /STK=16 /UG=Hs.30619 /UG_TITLE=Homo sapiens phenylalkylamine binding protein gene, complete cds; MG81 protein gene, partial cds; putative RNA-binding protein 3 RNPL gene, complete cds; and MG21 pseudogene, complete sequence /DEF=Homo sapiens phenylalkylamine binding protein gene, complete cds; MG81 protein gene, partia…	AF196969	Hs.30619	Hs.694353	48398158	chrX:48398158-48419697 (+) // 99.48 // p11.23	TBC1 domain family, member 25	TBC1D25
1555590_a_at	15.6296	30.148	118.893	Hs2.765.2	gb:BC009797.1 /DB_XREF=gi:14602570 /TID=Hs2.765.2 /CNT=1 /FEA=FLmRNA /TIER=FL /STK=1 /LL=2623 /UG_GENE=GATA1 /UG=Hs.765 /DEF=Homo sapiens, GATA-binding protein 1 (globin transcription factor 1), clone MGC:13628 IMAGE:4048082, mRNA, complete cds. /PROD=GATA-binding protein 1 (globin transcriptionfactor 1) /FL=gb:BC009797.1	BC009797	Hs.765	Hs.765	48644980	chrX:48644980-48652716 (+) // 97.19 // p11.23	GATA binding protein 1 (globin transcription factor 1)	GATA1
207019_s_at	17.3554	1015.04	5295.58	g4502016	gb:NM_003886.1 /DB_XREF=gi:4502016 /GEN=AKAP4 /FEA=FLmRNA /CNT=15 /TID=Hs.97633.0 /TIER=FL /STK=0 /UG=Hs.97633 /LL=8852 /DEF=Homo sapiens A kinase (PRKA) anchor protein 4 (AKAP4), mRNA. /PROD=A kinase (PRKA) anchor protein 4 /FL=gb:NM_003886.1	NM_003886	Hs.97633	Hs.97633	49955405	chrX:49955405-49965664 (-) // 98.31 // p11.22	A kinase (PRKA) anchor protein 4	AKAP4
205541_s_at	93.1696	180.339	1198.79	g8922423	gb:NM_018094.1 /DB_XREF=gi:8922423 /GEN=FLJ10441 /FEA=FLmRNA /CNT=37 /TID=Hs.59523.0 /TIER=FL /STK=6 /UG=Hs.59523 /LL=55708 /DEF=Homo sapiens hypothetical protein FLJ10441 (FLJ10441), mRNA. /PROD=hypothetical protein FLJ10441 /FL=gb:NM_018094.1	NM_018094	Hs.59523	Hs.59523	51486543	chrX:51486543-51489023 (+) // 99.76 // p11.22	G1 to S phase transition 2	GSPT2
237652_at	8.34193	18.4423	119.15	Hs.202054.0	gb:AI796835 /DB_XREF=gi:5362298 /DB_XREF=we22h08.x1 /CLONE=IMAGE:2341887 /FEA=EST /CNT=6 /TID=Hs.202054.0 /TIER=ConsEnd /STK=6 /UG=Hs.202054 /UG_TITLE=ESTs	AI796835	Hs.202054	Hs.670360	53260238	chrX:53260238-53260694 (-) // 89.72 // p11.22	---	---
235946_at	109.112	373.367	1830.05	Hs.126000.0	gb:AI127598 /DB_XREF=gi:3596112 /DB_XREF=qc26c03.x1 /CLONE=IMAGE:1710724 /FEA=EST /CNT=9 /TID=Hs.126000.0 /TIER=ConsEnd /STK=7 /UG=Hs.126000 /UG_TITLE=ESTs, Weakly similar to T08734 hypothetical protein DKFZp566F0546.1 (H.sapiens)	AI127598	Hs.126000	Hs.351743	53457462	chrX:53457462-53458061 (+) // 98.97 // p11.22	RIB43A domain with coiled-coils 1	RIBC1
227869_at	39.4398	40.8159	113.162	Hs.33020.0	gb:BG500573 /DB_XREF=gi:13462090 /DB_XREF=602546037F1 /CLONE=IMAGE:4668393 /FEA=EST /CNT=32 /TID=Hs.33020.0 /TIER=Stack /STK=27 /UG=Hs.33020 /UG_TITLE=Homo sapiens, clone IMAGE:3449838, mRNA, partial cds	BG500573	Hs.33020	Hs.415414	55172330	chrX:55172330-55187376 (-) // 76.9 // p11.21	family with sequence similarity 104, member B	FAM104B
225029_at	15.0722	19.1607	117.976	Hs.74111.2	gb:BE621082 /DB_XREF=gi:9892020 /DB_XREF=601493691F1 /CLONE=IMAGE:3895703 /FEA=EST /CNT=160 /TID=Hs.74111.2 /TIER=Stack /STK=53 /UG=Hs.74111 /LL=22913 /UG_GENE=RALY /UG_TITLE=RNA-binding protein (autoantigenic)	BE621082	Hs.74111	Hs.355559	56755659	chrX:56755659-56844810 (+) // 80.04 // p11.21	hypothetical LOC550643	LOC550643
236033_at	4.658	36.8449	752.336	Hs.56281.0	gb:AA349954 /DB_XREF=gi:2002274 /DB_XREF=EST56936 /FEA=EST /CNT=8 /TID=Hs.56281.0 /TIER=ConsEnd /STK=5 /UG=Hs.56281 /UG_TITLE=ESTs, Weakly similar to AF156777 1 ASB-1 protein (H.sapiens)	AA349954	Hs.56281	Hs.56281	63444071	chrX:63444071-63444880 (-) // 99.78 // q11.2	ankyrin repeat and SOCS box-containing 12	ASB12
218667_at	20.3189	61.8994	406.342	g11641292	gb:NM_022368.1 /DB_XREF=gi:11641292 /GEN=FLJ11830 /FEA=FLmRNA /CNT=78 /TID=Hs.21122.0 /TIER=FL+Stack /STK=36 /UG=Hs.21122 /LL=64219 /DEF=Homo sapiens hypothetical protein FLJ11830 similar to Praja1 (FLJ11830), mRNA. /PROD=hypothetical protein FLJ11830 similar to Praja1 /FL=gb:NM_022368.1	NM_022368	Hs.21122	Hs.522679	68380704	chrX:68380704-68382239 (-) // 99.87 // q13.1	praja ring finger 1	PJA1
231377_at	6.21786	270.18	3584.13	Hs.59459.0	gb:W93403 /DB_XREF=gi:1422545 /DB_XREF=zh46h03.s1 /CLONE=IMAGE:415157 /FEA=EST /CNT=8 /TID=Hs.59459.0 /TIER=Stack /STK=8 /UG=Hs.59459 /UG_TITLE=ESTs	W93403	Hs.59459	Hs.443936	70323838	chrX:70323838-70325970 (-) // 96.13 // q13.1	chromosome X open reading frame 65	CXorf65
217205_at	60.8043	71.3143	176.889	Hs.247983.0	gb:Y08772 /DB_XREF=gi:1770485 /FEA=DNA /CNT=1 /TID=Hs.247983.0 /TIER=ConsEnd /STK=0 /UG=Hs.247983 /UG_TITLE=H.sapiens PABII pseudogene /DEF=H.sapiens PABII pseudogene	Y08772	---	---	70639929	chrX:70639929-70640851 (-) // 99.67 // q13.1	---	---
207144_s_at	119.882	126.657	609.059	g4758735	gb:NM_004143.1 /DB_XREF=gi:4758735 /GEN=CITED1 /FEA=FLmRNA /CNT=6 /TID=Hs.40403.0 /TIER=FL /STK=0 /UG=Hs.40403 /LL=4435 /DEF=Homo sapiens Cbpp300-interacting transactivator, with GluAsp-rich carboxy-terminal domain, 1 (CITED1), mRNA. /PROD=Cbpp300-interacting transactivator, withGluAsp-rich carboxy-terminal domain, 1 /FL=gb:NM_004143.1 gb:U65092.1	NM_004143	Hs.40403	Hs.40403	71521496	chrX:71521496-71527004 (-) // 98.24 // q13.1	Cbp/p300-interacting transactivator, with Glu/Asp-rich carboxy-terminal domain, 1	CITED1
236758_at	18.0542	29.4321	505.099	Hs.172679.0	gb:AI149821 /DB_XREF=gi:3678290 /DB_XREF=qf43d07.x1 /CLONE=IMAGE:1752781 /FEA=EST /CNT=9 /TID=Hs.172679.0 /TIER=ConsEnd /STK=5 /UG=Hs.172679 /UG_TITLE=ESTs	AI149821	Hs.172679	Hs.512473	72158002	chrX:72158002-72158798 (+) // 96.38 // q13.2 /// chrX:72132452-72133238 (+) // 90.85 // q13.2 /// chrX:72001688-72002484 (-) // 96.38 // q13.2	hypothetical LOC100129407 /// putative uncharacterized protein ENSP00000362624-like	LOC100129407 /// LOC100132304
1554210_at	14.2192	220.83	1622.84	Hs2.157231.1	gb:BC021176.1 /DB_XREF=gi:18088950 /TID=Hs2.157231.1 /CNT=4 /FEA=FLmRNA /TIER=FL /STK=3 /UG=Hs.157231 /DEF=Homo sapiens, Similar to RIKEN cDNA 4930513O09 gene, clone MGC:33185 IMAGE:5269882, mRNA, complete cds. /PROD=Similar to RIKEN cDNA 4930513O09 gene /FL=gb:BC021176.1	BC021176	Hs.157231	Hs.157231	73524024	chrX:73524024-73524866 (+) // 97.1 // q13.2	zinc finger, CCHC domain containing 13	ZCCHC13
221606_s_at	17.1768	13.7612	283.098	g13529139	gb:BC005342.1 /DB_XREF=gi:13529139 /FEA=FLmRNA /CNT=28 /TID=Hs.282204.0 /TIER=FL /STK=0 /UG=Hs.282204 /LL=79366 /UG_GENE=NSBP1 /DEF=Homo sapiens, nucleosomal binding protein 1, clone MGC:12433, mRNA, complete cds. /PROD=nucleosomal binding protein 1 /FL=gb:AF250329.1 gb:BC005342.1	BC005342	Hs.282204	Hs.282204	80369569	chrX:80369569-80377137 (-) // 63.91 // q21.1	high-mobility group nucleosome binding domain 5	HMGN5
201311_s_at	74.0239	35.8227	339.772	Hs.14368.0	gb:AL515318 /DB_XREF=gi:12778811 /DB_XREF=AL515318 /CLONE=CL0BB030ZH05 (5 prime) /FEA=FLmRNA /CNT=361 /TID=Hs.14368.0 /TIER=Stack /STK=19 /UG=Hs.14368 /LL=6451 /UG_GENE=SH3BGRL /UG_TITLE=SH3 domain binding glutamic acid-rich protein like /FL=gb:AF042081.1 gb:AL136718.1 gb:NM_003022.1	AL515318	Hs.14368	Hs.108029	80457494	chrX:80457494-80554046 (+) // 97.95 // q21.1	SH3 domain binding glutamic acid-rich protein like	SH3BGRL
216779_at	5.14619	157.814	1070.07	Hs.307358.0	gb:Z22780.1 /DB_XREF=gi:396104 /FEA=mRNA /CNT=1 /TID=Hs.307358.0 /TIER=ConsEnd /STK=0 /UG=Hs.307358 /LL=1538 /UG_GENE=CYLC1 /DEF=H.sapiens cylicin mRNA. /PROD=cylicin	Z22780	Hs.307358	Hs.444230	83127893	chrX:83127893-83141705 (+) // 94.98 // q21.1	cylicin, basic protein of sperm head cytoskeleton 1	CYLC1
1554763_at	11.5252	208.944	2156.74	Hs2.404538.1	gb:BC040290.1 /DB_XREF=gi:25955575 /TID=Hs2.404538.1 /CNT=4 /FEA=FLmRNA /TIER=FL /STK=1 /UG=Hs.404538 /DEF=Homo sapiens, Similar to ubiquitin-conjugating enzyme E2D 2, clone MGC:42638 IMAGE:4826151, mRNA, complete cds. /PROD=Similar to ubiquitin-conjugating enzyme E2D 2 /FL=gb:BC040290.1	BC040290	Hs.404538	Hs.460809	84188784	chrX:84188784-84189895 (+) // 96.1 // q21.1	ubiquitin-conjugating enzyme E2D N-terminal like (pseudogene)	UBE2DNL
229963_at	40.6013	9.87903	167.405	Hs.47209.0	gb:AV726956 /DB_XREF=gi:10836377 /DB_XREF=AV726956 /CLONE=HTCAYD01 /FEA=EST /CNT=10 /TID=Hs.47209.0 /TIER=Stack /STK=8 /UG=Hs.47209 /UG_TITLE=ESTs, Weakly similar to C35826 hypothetical 13K protein A (H.sapiens)	AV726956	Hs.47209	Hs.47209	101408683	chrX:101408683-101409220 (-) // 97.99 // q22.1	brain expressed, X-linked 5	BEX5
220110_s_at	13.7789	40.868	249.883	g11545756	gb:NM_022052.1 /DB_XREF=gi:11545756 /GEN=NXF3 /FEA=FLmRNA /CNT=18 /TID=Hs.60386.0 /TIER=FL+Stack /STK=11 /UG=Hs.60386 /LL=56000 /DEF=Homo sapiens nuclear RNA export factor 3 (NXF3), mRNA. /PROD=nuclear RNA export factor 3 /FL=gb:NM_022052.1	NM_022052	Hs.60386	Hs.60386	102330751	chrX:102330751-102348022 (-) // 98.49 // q22.1	nuclear RNA export factor 3	NXF3
215440_s_at	50.8847	46.9864	195.101	Hs.184736.1	gb:AL523320 /DB_XREF=gi:12786813 /DB_XREF=AL523320 /CLONE=CS0DC001YD02 (5 prime) /FEA=DNA_3 /CNT=5 /TID=Hs.184736.1 /TIER=ConsEnd /STK=0 /UG=Hs.184736 /LL=56271 /UG_GENE=FLJ10097 /UG_TITLE=hypothetical protein FLJ10097	AL523320	Hs.184736	Hs.184736	102470080	chrX:102470080-102472010 (+) // 83.44 // q22.1	brain expressed, X-linked 4	BEX4
224819_at	46.1819	6.73793	123.493	Hs.288361.0	gb:AI743979 /DB_XREF=gi:5112267 /DB_XREF=wc32c07.x1 /CLONE=IMAGE:2316876 /FEA=mRNA /CNT=174 /TID=Hs.288361.0 /TIER=Stack /STK=58 /UG=Hs.288361 /UG_TITLE=Homo sapiens cDNA: FLJ22696 fis, clone HSI11696	AI743979	Hs.288361	Hs.389734	102507923	chrX:102507923-102510120 (-) // 56.83 // q22.1	transcription elongation factor A (SII)-like 8	TCEAL8
217975_at	31.3462	25.4928	266.239	g10047099	gb:NM_016303.1 /DB_XREF=gi:10047099 /GEN=LOC51186 /FEA=FLmRNA /CNT=239 /TID=Hs.15984.0 /TIER=FL+Stack /STK=74 /UG=Hs.15984 /LL=51186 /DEF=Homo sapiens pp21 homolog (LOC51186), mRNA. /PROD=pp21 homolog /FL=gb:NM_016303.1 gb:AF125535.1	NM_016303	Hs.15984	Hs.533287	102611422	chrX:102611422-102613381 (+) // 56.07 // q22.2	WW domain binding protein 5	WBP5
217963_s_at	432.166	322.349	1478.1	g7657043	gb:NM_014380.1 /DB_XREF=gi:7657043 /GEN=DXS6984E /FEA=FLmRNA /CNT=199 /TID=Hs.17775.0 /TIER=FL+Stack /STK=133 /UG=Hs.17775 /LL=27018 /DEF=Homo sapiens p75NTR-associated cell death executor; ovarian granulosa cell protein (13kD) (DXS6984E), mRNA. /PROD=p75NTR-associated cell death executor; ovariangranulosa cell protein (13kD) /FL=gb:AF187064.1 gb:NM_014380.1	NM_014380	Hs.17775	Hs.724452	102632108	chrX:102632108-102632999 (+) // 95.62 // q22.2	nerve growth factor receptor (TNFRSF16) associated protein 1	NGFRAP1
227279_at	19.2147	74.8247	618.067	Hs.39122.0	gb:AA847654 /DB_XREF=gi:2934172 /DB_XREF=oe49e05.s1 /CLONE=IMAGE:1414976 /FEA=EST /CNT=40 /TID=Hs.39122.0 /TIER=Stack /STK=17 /UG=Hs.39122 /UG_TITLE=ESTs, Weakly similar to CENB MOUSE MAJOR CENTROMERE AUTOANTIGEN B (M.musculus)	AA847654	Hs.39122	Hs.311776	102862833	chrX:102862833-102864855 (+) // 76.43 // q22.2 /// chrX:101395447-101397477 (-) // 78.89 // q22.1	transcription elongation factor A (SII)-like 3	TCEAL3
231569_at	28.7429	663.711	8948.66	Hs.98843.0	gb:N58489 /DB_XREF=gi:1202379 /DB_XREF=yv72c03.s1 /CLONE=IMAGE:248260 /FEA=EST /CNT=13 /TID=Hs.98843.0 /TIER=Stack /STK=9 /UG=Hs.98843 /UG_TITLE=ESTs, Highly similar to S12381 glycine receptor alpha-2 chain (H.sapiens)	N58489	Hs.98843	Hs.98843	102965862	chrX:102965862-102968958 (+) // 82.93 // q22.2	transmembrane protein 31	TMEM31
236848_s_at	20.2781	79.9855	456.248	Hs.188763.0	gb:AW291477 /DB_XREF=gi:6698040 /DB_XREF=UI-H-BI2-agh-d-10-0-UI.s1 /CLONE=IMAGE:2724163 /FEA=EST /CNT=5 /TID=Hs.188763.0 /TIER=ConsEnd /STK=5 /UG=Hs.188763 /UG_TITLE=ESTs	AW291477	Hs.188763	Hs.567543	104463610	chrX:104463610-104465632 (-) // 99.8 // q22.3	testis expressed 13A	TEX13A
229160_at	21.1031	13.4612	135.7	Hs.10653.0	gb:AI967987 /DB_XREF=gi:5764805 /DB_XREF=wu11f12.x1 /CLONE=IMAGE:2516687 /FEA=EST /CNT=28 /TID=Hs.10653.0 /TIER=Stack /STK=22 /UG=Hs.10653 /UG_TITLE=ESTs	AI967987	Hs.10653	Hs.592221	105451849	chrX:105451849-105452947 (+) // 97.42 // q22.3	melanoma associated antigen (mutated) 1-like 1	MUM1L1
231138_at	35.689	13.5442	132.465	Hs.116832.0	gb:BF223091 /DB_XREF=gi:11130268 /DB_XREF=7q28f11.x1 /CLONE=IMAGE:3699621 /FEA=EST /CNT=16 /TID=Hs.116832.0 /TIER=Stack /STK=16 /UG=Hs.116832 /UG_TITLE=ESTs	BF223091	Hs.116832	Hs.247868	111146752	chrX:111146752-111147211 (+) // 96.63 // q23	hypothetical LOC100329135	LOC100329135
241518_at	3.25822	58.3961	674.355	Hs.98610.0	gb:AA428659 /DB_XREF=gi:2112807 /DB_XREF=zw69d04.s1 /CLONE=IMAGE:781447 /FEA=EST /CNT=8 /TID=Hs.98610.0 /TIER=ConsEnd /STK=1 /UG=Hs.98610 /UG_TITLE=ESTs	AA428659	Hs.98610	Hs.599650	114047698	chrX:114047698-114048245 (-) // 99.63 // q23	---	---
1559258_a_at	17.5339	300.359	2774.94	Hs2.97892.1	gb:AK026566.1 /DB_XREF=gi:10439448 /TID=Hs2.97892.1 /CNT=6 /FEA=mRNA /TIER=ConsEnd /STK=0 /UG=Hs.97892 /UG_TITLE=Homo sapiens cDNA: FLJ22913 fis, clone KAT06142. /DEF=Homo sapiens cDNA: FLJ22913 fis, clone KAT06142.	AK026566	Hs.97892	Hs.97892	115592853	chrX:115592853-115594164 (-) // 83.41 // q23	chromosome X open reading frame 61	CXorf61
232332_at	12.7689	30.9422	431.694	Hs.97594.0	gb:AI610999 /DB_XREF=gi:4620166 /DB_XREF=tu28g09.x1 /CLONE=IMAGE:2252416 /FEA=mRNA /CNT=15 /TID=Hs.97594.0 /TIER=ConsEnd /STK=0 /UG=Hs.97594 /LL=57481 /UG_GENE=KIAA1210 /UG_TITLE=KIAA1210 protein	AI610999	Hs.97594	Hs.97594	118212598	chrX:118212598-118223411 (-) // 94.64 // q24	KIAA1210	KIAA1210
212413_at	9.9905	12.3268	111.242	Hs.90998.0	gb:D50918.1 /DB_XREF=gi:1469178 /GEN=KIAA0128 /FEA=mRNA /CNT=148 /TID=Hs.90998.0 /TIER=Stack /STK=14 /UG=Hs.90998 /LL=23157 /UG_TITLE=KIAA0128 protein; septin 2 /DEF=Human mRNA for KIAA0128 gene, partial cds.	D50918	Hs.90998	Hs.496666	118750910	chrX:118750910-118827323 (-) // 91.58 // q24	septin 6	SEPT6
242698_at	6.40922	101.832	1653.13	Hs.97775.1	gb:AA400121 /DB_XREF=gi:2053923 /DB_XREF=zu69a05.s1 /CLONE=IMAGE:743216 /FEA=EST /CNT=5 /TID=Hs.97775.1 /TIER=ConsEnd /STK=3 /UG=Hs.97775 /UG_TITLE=ESTs, Weakly similar to Testis-specific A-kinase-anchoring-protein (R.norvegicus)	AA400121	Hs.97775	Hs.592245	119029935	chrX:119029935-119037618 (+) // 99.15 // q24	A kinase (PRKA) anchor protein 14	AKAP14
218163_at	22.6238	44.5805	317.43	g7662501	gb:NM_014060.1 /DB_XREF=gi:7662501 /GEN=MCT-1 /FEA=FLmRNA /CNT=143 /TID=Hs.102696.0 /TIER=FL+Stack /STK=63 /UG=Hs.102696 /LL=28985 /DEF=Homo sapiens MCT-1 protein (MCT-1), mRNA. /PROD=MCT-1 protein /FL=gb:BC001013.1 gb:NM_014060.1 gb:AB034206.1	NM_014060	Hs.102696	Hs.102696	119737834	chrX:119737834-119746238 (+) // 97.77 // q24	malignant T cell amplified sequence 1	MCTS1
229498_at	36.1426	20.3852	306.9	Hs.25191.0	gb:AI197932 /DB_XREF=gi:3750538 /DB_XREF=qs72h01.x1 /CLONE=IMAGE:1943665 /FEA=EST /CNT=24 /TID=Hs.25191.0 /TIER=Stack /STK=17 /UG=Hs.25191 /UG_TITLE=ESTs	AI197932	Hs.25191	Hs.105134	131506031	chrX:131506031-131506881 (-) // 86.77 // q26.2	muscleblind-like 3 (Drosophila)	MBNL3
225361_x_at	72.3423	8.14768	111.663	Hs.288550.0	gb:AI348001 /DB_XREF=gi:4085207 /DB_XREF=qp61a12.x1 /CLONE=IMAGE:1927486 /FEA=mRNA /CNT=76 /TID=Hs.288550.0 /TIER=Stack /STK=14 /UG=Hs.288550 /UG_TITLE=Homo sapiens cDNA: FLJ23156 fis, clone LNG09609	AI348001	Hs.288550	Hs.404706	133903603	chrX:133903603-133927927 (-) // 97.91 // q26.3	family with sequence similarity 122B	FAM122B
201828_x_at	22.8212	56.983	214.074	g4503180	gb:NM_003928.1 /DB_XREF=gi:4503180 /GEN=CXX1 /FEA=FLmRNA /CNT=217 /TID=Hs.250708.0 /TIER=FL+Stack /STK=68 /UG=Hs.250708 /LL=8933 /DEF=Homo sapiens CAAX box 1 (CXX1), mRNA. /PROD=CAAX box 1 /FL=gb:BC002385.1 gb:BC002410.1 gb:NM_003928.1 gb:AF038168.1 gb:AF052096.1	NM_003928	Hs.250708	Hs.522789	134166396	chrX:134166396-134167573 (+) // 97.35 // q26.3	family with sequence similarity 127, member A	FAM127A
230584_at	21.8002	307.226	1231.66	Hs.131127.0	gb:AI333111 /DB_XREF=gi:4069670 /DB_XREF=qq26h12.x1 /CLONE=IMAGE:1933703 /FEA=EST /CNT=13 /TID=Hs.131127.0 /TIER=Stack /STK=12 /UG=Hs.131127 /UG_TITLE=ESTs	AI333111	Hs.131127	Hs.533540	134254571	chrX:134254571-134257880 (+) // 90.82 // q26.3 /// chrX:134382536-134385842 (-) // 90.69 // q26.3	hypothetical LOC100287728 /// zinc finger protein 75D	LOC100287728 /// ZNF75D
220921_at	29.3426	220.426	3274.58	g7305516	gb:NM_013453.1 /DB_XREF=gi:7305516 /GEN=SPANXA1 /FEA=FLmRNA /CNT=3 /TID=Hs.293266.0 /TIER=FL /STK=1 /UG=Hs.293266 /LL=30014 /DEF=Homo sapiens sperm protein associated with the nucleus, X chromosome, family member A1 (SPANXA1), mRNA. /PROD=sperm protein associated with the nucleus, Xchromosome, family member A1 /FL=gb:NM_013453.1 gb:AF098307.1	NM_013453	Hs.293266	Hs.711489	140096760	chrX:140096760-140097875 (+) // 92.37 // q27.1 /// chrX:140084755-140085870 (+) // 92.37 // q27.1	SPANX family, member B1 /// SPANX family, member B2 /// SPANX family, member F1	SPANXB1 /// SPANXB2 /// SPANXF1
220217_x_at	28.1554	431.926	3545.04	g13435136	gb:NM_022661.1 /DB_XREF=gi:13435136 /GEN=SPANXC /FEA=FLmRNA /CNT=11 /TID=Hs.178053.0 /TIER=FL /STK=0 /UG=Hs.178053 /LL=64663 /DEF=Homo sapiens SPANX family, member C (SPANXC), mRNA. /PROD=SPANX family, member C /FL=gb:NM_022661.1 gb:BC005382.1	NM_022661	Hs.178053	Hs.558533	140677855	chrX:140677855-140678888 (+) // 90.93 // q27.2 /// chrX:140335596-140336629 (-) // 94.61 // q27.2 /// chrX:140671806-140672839 (-) // 90.93 // q27.2	SPANX family, member C	SPANXC
231159_at	83.8013	718.241	4599.69	Hs.98197.0	gb:AW206247 /DB_XREF=gi:6505736 /DB_XREF=UI-H-BI1-afe-c-06-0-UI.s1 /CLONE=IMAGE:2721418 /FEA=EST /CNT=30 /TID=Hs.98197.0 /TIER=Stack /STK=28 /UG=Hs.98197 /UG_TITLE=ESTs	AW206247	Hs.98197	Hs.592233	145891301	chrX:145891301-145891927 (+) // 96.0 // q27.3 /// chrX:145895623-145896249 (-) // 96.0 // q27.3	chromosome X open reading frame 51	CXorf51
220314_at	16.503	122.557	393.645	g7706602	gb:NM_016153.1 /DB_XREF=gi:7706602 /GEN=LW-1 /FEA=FLmRNA /CNT=10 /TID=Hs.179756.0 /TIER=FL /STK=5 /UG=Hs.179756 /LL=51402 /DEF=Homo sapiens LW-1 (LW-1), mRNA. /PROD=LW-1 /FL=gb:NM_016153.1 gb:AF139980.1	NM_016153	Hs.179756	Hs.709146	148676926	chrX:148676926-148858517 (+) // 96.5 // q28 /// chrX:148674182-148855773 (-) // 96.5 // q28	heat shock transcription factor family, X linked 1 /// heat shock transcription factor family, X linked 2	HSFX1 /// HSFX2
231573_at	13.5925	71.2909	592.4	Hs.301960.0	gb:AA460295 /DB_XREF=gi:2185111 /DB_XREF=zx51b10.s1 /CLONE=IMAGE:795739 /FEA=EST /CNT=14 /TID=Hs.301960.0 /TIER=Stack /STK=12 /UG=Hs.301960 /UG_TITLE=ESTs	AA460295	Hs.301960	Hs.301960	150891244	chrX:150891244-150891662 (+) // 95.43 // q28	fetal and adult testis expressed 1	FATE1
225383_at	64.03	33.8782	157.19	Hs.9786.0	gb:BF793625 /DB_XREF=gi:12098679 /DB_XREF=602254304F1 /CLONE=IMAGE:4346545 /FEA=FLmRNA /CNT=116 /TID=Hs.9786.0 /TIER=Stack /STK=16 /UG=Hs.9786 /LL=10838 /UG_GENE=ZNF275 /UG_TITLE=zinc finger protein 275 /FL=gb:NM_020636.1	BF793625	Hs.9786	Hs.348963	152599624	chrX:152599624-152618383 (+) // 74.96 // q28	zinc finger protein 275	ZNF275
202471_s_at	28.3539	339.727	1187.86	g4758581	gb:NM_004135.1 /DB_XREF=gi:4758581 /GEN=IDH3G /FEA=FLmRNA /CNT=163 /TID=Hs.75253.0 /TIER=FL+Stack /STK=43 /UG=Hs.75253 /LL=3421 /DEF=Homo sapiens isocitrate dehydrogenase 3 (NAD+) gamma (IDH3G), mRNA. /PROD=isocitrate dehydrogenase 3 (NAD+) gamma /FL=gb:BC001902.1 gb:NM_004135.1 gb:BC000933.2 gb:U40272.1	NM_004135	Hs.75253	Hs.410197	153051221	chrX:153051221-153059967 (-) // 97.74 // q28	isocitrate dehydrogenase 3 (NAD+) gamma	IDH3G
201004_at	45.8406	951.54	2694.9	g5454089	gb:NM_006280.1 /DB_XREF=gi:5454089 /GEN=SSR4 /FEA=FLmRNA /CNT=319 /TID=Hs.102135.0 /TIER=FL+Stack /STK=156 /UG=Hs.102135 /LL=6748 /DEF=Homo sapiens signal sequence receptor, delta (translocon-associated protein delta) (SSR4), mRNA. /PROD=signal sequence receptor, delta /FL=gb:NM_006280.1 gb:BC003371.1	NM_006280	Hs.102135	Hs.409223	153060093	chrX:153060093-153063953 (+) // 99.07 // q28	signal sequence receptor, delta (translocon-associated protein delta)	SSR4
207364_at	10.5191	79.1581	500.428	g4503176	gb:NM_001586.1 /DB_XREF=gi:4503176 /GEN=CXORF2 /FEA=FLmRNA /CNT=5 /TID=Hs.115365.0 /TIER=FL /STK=2 /UG=Hs.115365 /LL=1527 /DEF=Homo sapiens chromosome X open reading frame 2 (CXORF2), mRNA. /PROD=chromosome X open reading frame 2 /FL=gb:NM_001586.1 gb:U93720.1	NM_001586	Hs.115365	Hs.672606	153498931	chrX:153498931-153523438 (-) // 93.44 // q28 /// chrX:153424683-153441839 (-) // 89.9 // q28 /// chrX:153461813-153478959 (-) // 89.9 // q28	testis expressed 28	TEX28
202275_at	18.4582	84.8458	362.978	g4503844	gb:NM_000402.1 /DB_XREF=gi:4503844 /GEN=G6PD /FEA=FLmRNA /CNT=225 /TID=Hs.80206.0 /TIER=FL+Stack /STK=58 /UG=Hs.80206 /LL=2539 /DEF=Homo sapiens glucose-6-phosphate dehydrogenase (G6PD), nuclear gene encoding mitochondrial protein, mRNA. /PROD=glucose-6-phosphate dehydrogenase /FL=gb:BC000337.1 gb:NM_000402.1 gb:M21248.1	NM_000402	Hs.80206	Hs.461047	153759605	chrX:153759605-153775469 (-) // 98.7 // q28	glucose-6-phosphate dehydrogenase	G6PD
214412_at	14.8101	319.604	792.027	Hs.83363.1	gb:AI218431 /DB_XREF=gi:3798246 /DB_XREF=qh24d10.x1 /CLONE=IMAGE:1845619 /FEA=DNA /CNT=13 /TID=Hs.83363.1 /TIER=Stack /STK=11 /UG=Hs.83363 /LL=8263 /UG_GENE=F8A /UG_TITLE=coagulation factor VIII-associated (intronic transcript)	AI218431	Hs.83363	Hs.592246	154610427	chrX:154610427-154610944 (+) // 98.1 // q28 /// chrX:154113316-154113833 (+) // 98.1 // q28 /// chrX:154689079-154689596 (-) // 98.29 // q28	H2A histone family, member B1 /// H2A histone family, member B2 /// H2A histone family, member B3	H2AFB1 /// H2AFB2 /// H2AFB3

## Sheet: GroupD
Probe Set ID	SG	PS	RS	Transcript ID(Array Design)	Target Description	Representative Public ID	Archival UniGene Cluster	UniGene ID	Location on X	Alignment	Gene Title	Gene Symbol
207281_x_at	948.606	763.78	409.463	g7706758	gb:NM_016378.1 /DB_XREF=gi:7706758 /GEN=VCX-2r /FEA=FLmRNA /CNT=13 /TID=Hs.279737.0 /TIER=FL+Stack /STK=10 /UG=Hs.279737 /LL=51480 /DEF=Homo sapiens variable charge protein on X with two repeats (VCX-2r), mRNA. /PROD=variable charge protein on X with two repeats /FL=gb:NM_016378.1 gb:AF159127.1	NM_016378	Hs.279737	Hs.279737	8433466	chrX:8433466-8434550 (+) // 95.57 // p22.31 /// chrX:7811219-7812183 (+) // 93.73 // p22.31 /// chrX:8137985-8138709 (-) // 96.68 // p22.31 /// chrX:6451659-6452563 (-) // 96.31 // p22.31	variable charge, X-linked 2	VCX2
218793_s_at	72.7691	726.589	166.074	g5803158	gb:NM_006746.1 /DB_XREF=gi:5803158 /GEN=SCML1 /FEA=FLmRNA /CNT=77 /TID=Hs.109655.0 /TIER=FL+Stack /STK=11 /UG=Hs.109655 /LL=6322 /DEF=Homo sapiens sex comb on midleg (Drosophila)-like 1 (SCML1), mRNA. /PROD=sex comb on midleg (Drosophila)-like 1 /FL=gb:NM_006746.1 gb:AF160728.1	NM_006746	Hs.109655	Hs.109655	17755628	chrX:17755628-17773102 (+) // 99.2 // p22.13	sex comb on midleg-like 1 (Drosophila)	SCML1
206147_x_at	400.084	337.032	93.9383	g5174668	gb:NM_006089.1 /DB_XREF=gi:5174668 /GEN=SCML2 /FEA=FLmRNA /CNT=22 /TID=Hs.171558.0 /TIER=FL /STK=6 /UG=Hs.171558 /LL=10389 /DEF=Homo sapiens sex comb on midleg (Drosophila)-like 2 (SCML2), mRNA. /PROD=sex comb on midleg (Drosophila)-like 2 /FL=gb:NM_006089.1	NM_006089	Hs.171558	Hs.495774	18257433	chrX:18257433-18372778 (-) // 92.4 // p22.13	sex comb on midleg-like 2 (Drosophila)	SCML2
209439_s_at	169.316	143.727	195.6	g1304117	gb:D38616.1 /DB_XREF=gi:1304117 /FEA=FLmRNA /CNT=117 /TID=Hs.54941.0 /TIER=FL+Stack /STK=15 /UG=Hs.54941 /LL=5256 /UG_GENE=PHKA2 /DEF=Human mRNA for phosphorylase kinase alpha subunit, complete cds. /PROD=phosphorylase kinase alpha subunit /FL=gb:D38616.1 gb:NM_000292.1	D38616	Hs.54941	Hs.54941	18911089	chrX:18911089-19002221 (-) // 100.0 // p22.13	phosphorylase kinase, alpha 2 (liver)	PHKA2
233427_x_at	84.9962	80.9976	110.041	Hs.287598.0	gb:AK023870.1 /DB_XREF=gi:10435938 /FEA=mRNA /CNT=3 /TID=Hs.287598.0 /TIER=ConsEnd /STK=0 /UG=Hs.287598 /UG_TITLE=Homo sapiens cDNA FLJ13808 fis, clone THYRO1000253 /DEF=Homo sapiens cDNA FLJ13808 fis, clone THYRO1000253.	AK023870	Hs.287598	Hs.661071	19112501	chrX:19112501-19114528 (+) // 58.21 // p22.13	---	---
1552967_at	4.2276	123.773	97.3771	Hs2.132485.1	gb:NM_152577.1 /DB_XREF=gi:22749188 /TID=Hs2.132485.1 /CNT=3 /FEA=FLmRNA /TIER=FL /STK=2 /LL=158506 /UG_GENE=FLJ25735 /UG=Hs.132485 /UG_TITLE=hypothetical protein FLJ25735 /DEF=Homo sapiens hypothetical protein FLJ25735 (FLJ25735), mRNA. /FL=gb:NM_152577.1	NM_152577	Hs.132485	Hs.132485	22291059	chrX:22291059-22292577 (+) // 99.87 // p22.11	zinc finger protein 645	ZNF645
201923_at	330.117	1521.48	2815.51	g5453548	gb:NM_006406.1 /DB_XREF=gi:5453548 /GEN=AOE372 /FEA=FLmRNA /CNT=192 /TID=Hs.83383.0 /TIER=FL+Stack /STK=73 /UG=Hs.83383 /LL=10549 /DEF=Homo sapiens thioredoxin peroxidase (antioxidant enzyme) (AOE372), mRNA. /PROD=thioredoxin peroxidase /FL=gb:BC003609.1 gb:U25182.1 gb:NM_006406.1	NM_006406	Hs.83383	Hs.83383	23685644	chrX:23685644-23704514 (+) // 96.2 // p22.11	peroxiredoxin 4	PRDX4
221620_s_at	211.606	188.387	91.7312	g12001991	gb:AF061264.1 /DB_XREF=gi:12001991 /FEA=FLmRNA /CNT=14 /TID=Hs.40065.1 /TIER=FL+Stack /STK=12 /UG=Hs.40065 /LL=79135 /UG_GENE=MGC4825 /DEF=Homo sapiens brain my025 mRNA, complete cds. /PROD=brain my025 /FL=gb:AF061264.1	AF061264	Hs.40065	Hs.495851	23851483	chrX:23851483-23926020 (-) // 99.24 // p22.11	apolipoprotein O	APOO
1553391_at	45.2007	134.725	58.4691	Hs2.351265.1	gb:NM_152761.1 /DB_XREF=gi:22749496 /TID=Hs2.351265.1 /CNT=3 /FEA=FLmRNA /TIER=FL /STK=1 /LL=254158 /UG_GENE=FLJ25444 /UG=Hs.351265 /UG_TITLE=hypothetical protein FLJ25444 /DEF=Homo sapiens hypothetical protein FLJ25444 (FLJ25444), mRNA. /FL=gb:NM_152761.1	NM_152761	Hs.351265	Hs.351265	23926122	chrX:23926122-23957624 (+) // 99.87 // p22.11	chromosome X open reading frame 58	CXorf58
239732_x_at	33.4347	238.971	308.591	Hs.224124.0	gb:AI125523 /DB_XREF=gi:3594037 /DB_XREF=qd94a02.x1 /CLONE=IMAGE:1737098 /FEA=EST /CNT=4 /TID=Hs.224124.0 /TIER=ConsEnd /STK=4 /UG=Hs.224124 /UG_TITLE=ESTs	AI125523	Hs.224124	Hs.535216	37029265	chrX:37029265-37029736 (+) // 98.95 // p21.1 /// chrX:34962560-34963031 (+) // 91.81 // p21.1 /// chrX:37400184-37400648 (-) // 90.97 // p21.1	family with sequence similarity 47, member C	FAM47C
243700_x_at	10.3056	270.09	224.175	Hs.143268.0	gb:AI141715 /DB_XREF=gi:3649172 /DB_XREF=ot08h06.x1 /CLONE=IMAGE:1614299 /FEA=EST /CNT=3 /TID=Hs.143268.0 /TIER=ConsEnd /STK=3 /UG=Hs.143268 /UG_TITLE=ESTs	AI141715	Hs.143268	Hs.143268	37029300	chrX:37029300-37029737 (+) // 90.09 // p21.1 /// chrX:34147872-34148307 (-) // 97.97 // p21.1	family with sequence similarity 47, member A	FAM47A
201444_s_at	111.421	498.195	76.0332	g5031590	gb:NM_005765.1 /DB_XREF=gi:5031590 /GEN=APT6M8-9 /FEA=FLmRNA /CNT=309 /TID=Hs.183434.0 /TIER=FL+Stack /STK=15 /UG=Hs.183434 /LL=10159 /DEF=Homo sapiens ATPase, H+ transporting, lysosomal (vacuolar proton pump) membrane sector associated protein M8-9 (APT6M8-9), mRNA. /PROD=ATPase, H+ transporting, lysosomal (vacuolarproton pump) membrane sector associated protein M8-9 /FL=gb:AF248966.1 gb:NM_0057…	NM_005765	Hs.183434	Hs.495960	40458842	chrX:40458842-40465135 (+) // 95.5 // p11.4	ATPase, H+ transporting, lysosomal accessory protein 2	ATP6AP2
208082_x_at	167.348	246.079	198.591	g13540508	gb:NM_030757.1 /DB_XREF=gi:13540508 /GEN=MKRN4 /FEA=FLmRNA /CNT=1 /TID=HsAffx.900034.19 /TIER=FL /STK=0 /DEF=Homo sapiens makorin, ring finger protein, 4 (MKRN4), mRNA. /PROD=makorin, ring finger protein, 4 /FL=gb:NM_030757.1	NM_030757	---	---	40693395	chrX:40693395-40697064 (+) // 74.15 // p11.4	---	---
234496_x_at	56.6741	89.6807	113.332	Hs.302019.2	gb:Z93015 /DB_XREF=gi:9929207 /FEA=DNA /CNT=1 /TID=Hs.302019.2 /TIER=ConsEnd /STK=0 /UG=Hs.302019 /LL=60506 /UG_GENE=NYX /UG_TITLE=nyctalopin /DEF=Human DNA sequence from clone RP1-169I5 on chromosome Xp11. Contains ESTs, STSs, GSSs and CpG islands. Contains the 3 part of the DDX3 gene for DEADH (Asp-Glu-Ala-AspHis) box polypeptide 3 and a novel gene for a leucine rich protein	Z93015	Hs.302019	Hs.302019	41330131	chrX:41330131-41334152 (+) // 98.59 // p11.4	nyctalopin	NYX
220591_s_at	133.716	280.451	190.749	g13376775	gb:NM_025184.1 /DB_XREF=gi:13376775 /GEN=FLJ22843 /FEA=FLmRNA /CNT=5 /TID=Hs.301143.0 /TIER=FL /STK=0 /UG=Hs.301143 /LL=80258 /DEF=Homo sapiens hypothetical protein FLJ22843 (FLJ22843), mRNA. /PROD=hypothetical protein FLJ22843 /FL=gb:NM_025184.1	NM_025184	Hs.301143	Hs.521953	44007962	chrX:44007962-44202911 (-) // 98.87 // p11.3	EF-hand domain (C-terminal) containing 2	EFHC2
218320_s_at	101.909	116.678	167.364	g9506682	gb:NM_019056.1 /DB_XREF=gi:9506682 /GEN=FLJ20494 /FEA=FLmRNA /CNT=131 /TID=Hs.111497.0 /TIER=FL /STK=0 /UG=Hs.111497 /LL=54539 /DEF=Homo sapiens similar to mouse neuronal protein 15.6 (FLJ20494), mRNA. /PROD=similar to mouse neuronal protein 15.6 /FL=gb:NM_019056.1	NM_019056	Hs.111497	Hs.521969	47001615	chrX:47001615-47004091 (-) // 92.15 // p11.23	NADH dehydrogenase (ubiquinone) 1 beta subcomplex, 11, 17.3kDa	NDUFB11
215089_s_at	43.0386	104.473	50.2882	Hs.332750.0	gb:AW409974 /DB_XREF=gi:6935515 /DB_XREF=fh03d12.y1 /CLONE=IMAGE:2961094 /FEA=mRNA /CNT=13 /TID=Hs.332750.0 /TIER=ConsEnd /STK=0 /UG=Hs.332750 /UG_TITLE=Homo sapiens cDNA FLJ10100 fis, clone HEMBA1002469, moderately similar to DXS8237E PROTEIN	AW409974	Hs.332750	Hs.401509	47004298	chrX:47004298-47046211 (+) // 94.39 // p11.23	RNA binding motif protein 10	RBM10
208723_at	402.476	606.385	677.332	g12653164	gb:BC000350.1 /DB_XREF=gi:12653164 /FEA=FLmRNA /CNT=474 /TID=Hs.171501.0 /TIER=FL+Stack /STK=123 /UG=Hs.171501 /LL=8237 /UG_GENE=USP11 /DEF=Homo sapiens, ubiquitin specific protease 11, clone MGC:8620, mRNA, complete cds. /PROD=ubiquitin specific protease 11 /FL=gb:BC000350.1 gb:NM_004651.1 gb:U44839.1	BC000350	Hs.171501	Hs.171501	47092438	chrX:47092438-47107350 (+) // 96.55 // p11.23	ubiquitin specific peptidase 11	USP11
201666_at	103.777	154.581	202.77	g4507508	gb:NM_003254.1 /DB_XREF=gi:4507508 /GEN=TIMP1 /FEA=FLmRNA /CNT=282 /TID=Hs.5831.0 /TIER=FL+Stack /STK=220 /UG=Hs.5831 /LL=7076 /DEF=Homo sapiens tissue inhibitor of metalloproteinase 1 (erythroid potentiating activity, collagenase inhibitor) (TIMP1), mRNA. /PROD=tissue inhibitor of metalloproteinase 1precursor /FL=gb:NM_003254.1 gb:BC000866.1 gb:M12670.1 gb:M59906.1	NM_003254	Hs.5831	Hs.522632	47441830	chrX:47441830-47446187 (+) // 98.21 // p11.23	TIMP metallopeptidase inhibitor 1	TIMP1
203617_x_at	67.3295	180.472	311.964	g11496880	gb:NM_005229.2 /DB_XREF=gi:11496880 /GEN=ELK1 /FEA=FLmRNA /CNT=93 /TID=Hs.181128.0 /TIER=FL+Stack /STK=33 /UG=Hs.181128 /LL=2002 /DEF=Homo sapiens ELK1, member of ETS oncogene family (ELK1), mRNA. /PROD=ELK1 protein /FL=gb:AB016193.1 gb:NM_005229.2	NM_005229	Hs.181128	Hs.181128	47494919	chrX:47494919-47510020 (-) // 98.37 // p11.23	ELK1, member of ETS oncogene family	ELK1
218495_at	416.141	443.462	570.853	g4759297	gb:NM_004182.1 /DB_XREF=gi:4759297 /GEN=UXT /FEA=FLmRNA /CNT=84 /TID=Hs.172791.0 /TIER=FL+Stack /STK=42 /UG=Hs.172791 /LL=8409 /DEF=Homo sapiens ubiquitously-expressed transcript (UXT), mRNA. /PROD=ubiquitously-expressed transcript /FL=gb:AF083241.1 gb:AF083242.1 gb:AF092737.1 gb:BC000720.1 gb:NM_004182.1	NM_004182	Hs.172791	Hs.172791	47511196	chrX:47511196-47518560 (-) // 100.0 // p11.23	ubiquitously-expressed transcript	UXT
206626_x_at	464.513	594.994	102.558	g12803043	gb:BC001003.2 /DB_XREF=gi:12803043 /FEA=FLmRNA /CNT=10 /TID=Hs.194759.0 /TIER=FL /STK=0 /UG=Hs.194759 /LL=6756 /UG_GENE=SSX1 /DEF=Homo sapiens, synovial sarcoma, X breakpoint 1, clone MGC:5162, mRNA, complete cds. /PROD=synovial sarcoma, X breakpoint 1 /FL=gb:BC001003.2 gb:NM_005635.1	BC001003	Hs.194759	Hs.434142	48114806	chrX:48114806-48126879 (+) // 95.56 // p11.23 /// chrX:52652187-52790617 (+) // 88.82 // p11.22	synovial sarcoma, X breakpoint 1	SSX1
211731_x_at	113.112	128.322	44.8727	g13543493	gb:BC005904.1 /DB_XREF=gi:13543493 /FEA=FLmRNA /CNT=1 /TID=HsAffx.900753.351 /TIER=FL /STK=0 /DEF=Homo sapiens, synovial sarcoma, X breakpoint 3, clone MGC:14495, mRNA, complete cds. /PROD=synovial sarcoma, X breakpoint 3 /FL=gb:BC005904.1	BC005904	Hs.900753	Hs.558445	48208973	chrX:48208973-48216142 (-) // 67.88 // p11.23	synovial sarcoma, X breakpoint 3	SSX3
222138_s_at	47.0122	91.4674	120.514	Hs.12142.1	gb:AF158978.1 /DB_XREF=gi:8886053 /FEA=mRNA /CNT=9 /TID=Hs.12142.1 /TIER=ConsEnd /STK=0 /UG=Hs.12142 /LL=64743 /UG_GENE=WDR13 /UG_TITLE=WD repeat domain 13 /DEF=Homo sapiens WDR13-like mRNA sequence.	AF158978	Hs.12142	Hs.521973	48455901	chrX:48455901-48463504 (+) // 99.37 // p11.23	WD repeat domain 13	WDR13
38964_r_at	44.6928	82.2598	117.66	4855268_RC	Cluster Incl. U12707:Human Wiskott-Aldrich syndrome protein (WASP) mRNA, complete cds /cds=(34,1542) /gb=U12707 /gi=695150 /ug=Hs.2157 /len=1806	U12707	Hs.2157	Hs.2157	48542208	chrX:48542208-48549815 (+) // 91.97 // p11.23	Wiskott-Aldrich syndrome (eczema-thrombocytopenia)	WAS
206846_s_at	44.1929	842.931	529.951	g13128863	gb:NM_006044.2 /DB_XREF=gi:13128863 /GEN=HDAC6 /FEA=FLmRNA /CNT=11 /TID=Hs.6764.0 /TIER=FL /STK=0 /UG=Hs.6764 /LL=10013 /DEF=Homo sapiens histone deacetylase 6 (HDAC6), mRNA. /PROD=histone deacetylase 6 /FL=gb:AF132609.1 gb:NM_006044.2 gb:AB020708.1	NM_006044	Hs.6764	Hs.6764	48660486	chrX:48660486-48683380 (+) // 100.0 // p11.23	histone deacetylase 6	HDAC6
218952_at	36.1527	103.19	119.893	g7019518	gb:NM_013271.1 /DB_XREF=gi:7019518 /GEN=SAAS /FEA=FLmRNA /CNT=111 /TID=Hs.256311.0 /TIER=FL+Stack /STK=75 /UG=Hs.256311 /LL=27344 /DEF=Homo sapiens granin-like neuroendocrine peptide precursor (SAAS), mRNA. /PROD=granin-like neuroendocrine peptide precursor /FL=gb:NM_013271.1 gb:BC002851.1 gb:AF181562.1	NM_013271	Hs.256311	Hs.522640	48689509	chrX:48689509-48693960 (-) // 88.34 // p11.23	proprotein convertase subtilisin/kexin type 1 inhibitor	PCSK1N
224745_x_at	112.329	329.936	392.387	Hs.184029.0	gb:AK026260.1 /DB_XREF=gi:10439057 /FEA=mRNA /CNT=150 /TID=Hs.184029.0 /TIER=Stack /STK=13 /UG=Hs.184029 /LL=55593 /UG_GENE=DKFZp761A052 /UG_TITLE=hypothetical protein DKFZp761A052 /DEF=Homo sapiens cDNA: FLJ22607 fis, clone HSI04846.	AK026260	Hs.184029	Hs.496098	48779304	chrX:48779304-48814892 (-) // 93.73 // p11.23	OTU domain containing 5	OTUD5
203456_at	23.0467	93.1034	138.909	g6005793	gb:NM_007213.1 /DB_XREF=gi:6005793 /GEN=JM4 /FEA=FLmRNA /CNT=126 /TID=Hs.29595.0 /TIER=FL+Stack /STK=75 /UG=Hs.29595 /LL=11230 /DEF=Homo sapiens JM4 protein (JM4), mRNA. /PROD=JM4 protein /FL=gb:AJ005896.1 gb:NM_007213.1	NM_007213	Hs.29595	Hs.29595	48928817	chrX:48928817-48931662 (-) // 100.0 // p11.23	PRA1 domain family, member 2	PRAF2
208235_x_at	1762.53	1617.45	440.283	g11024640	gb:NM_021123.1 /DB_XREF=gi:11024640 /GEN=GAGE7 /FEA=FLmRNA /CNT=2 /TID=Hs.278606.0 /TIER=FL /STK=0 /UG=Hs.278606 /LL=2579 /DEF=Homo sapiens G antigen 7 (GAGE7), mRNA. /PROD=G antigen 7 /FL=gb:NM_021123.1 gb:AF058988.1	NM_021123	Hs.278606	Hs.460641	49216651	chrX:49216651-49223940 (+) // 92.37 // p11.23 /// chrX:49325481-49332808 (+) // 92.18 // p11.23 /// chrX:49335039-49342357 (+) // 92.18 // p11.23 /// chrX:49296816-49304141 (+) // 91.98 // p11.23 /// chrX:49306372-49313697 (+) // 91.98 // p11.23 /// chrX:49315928-49323249 (+) // 91.98 // p11.23 /// chrX:49178552-49233478 (+) // 91.98 // p11.23 /// chrX:49344588-49351904 (+) // 91.79 // p11.23 ///…	G antigen 12F /// G antigen 12G /// G antigen 12I /// G antigen 5 /// G antigen 7	GAGE12F /// GAGE12G /// GAGE12I /// GAGE5 /// GAGE7
206897_at	165.822	120.815	32.8002	g9558760	gb:NM_003785.2 /DB_XREF=gi:9558760 /GEN=GAGEB1 /FEA=FLmRNA /CNT=11 /TID=Hs.128231.0 /TIER=FL /STK=0 /UG=Hs.128231 /LL=8712 /DEF=Homo sapiens G antigen, family B, 1 (prostate associated) (GAGEB1), mRNA. /PROD=G antigen B1 /FL=gb:BC004861.1 gb:NM_003785.2 gb:AF058989.1	NM_003785	Hs.128231	Hs.128231	49452055	chrX:49452055-49460992 (-) // 90.74 // p11.23	P antigen family, member 1 (prostate associated)	PAGE1
231481_at	22.4752	119.044	22.8689	Hs.130310.0	gb:AI003521 /DB_XREF=gi:3203060 /DB_XREF=an19d12.s1 /CLONE=IMAGE:1699127 /FEA=mRNA /CNT=11 /TID=Hs.130310.0 /TIER=Stack /STK=11 /UG=Hs.130310 /UG_TITLE=Homo sapiens mRNA; cDNA DKFZp434C0820 (from clone DKFZp434C0820); partial cds	AI003521	Hs.130310	Hs.130310	50089740	chrX:50089740-50094909 (+) // 86.8 // p11.22	cyclin B3	CCNB3
241596_at	87.2533	49.3923	171.947	Hs.22901.0	gb:AL045306 /DB_XREF=gi:5433466 /DB_XREF=DKFZp434O0750_r1 /CLONE=DKFZp434O0750 /FEA=EST /CNT=13 /TID=Hs.22901.0 /TIER=ConsEnd /STK=0 /UG=Hs.22901 /UG_TITLE=ESTs, Highly similar to unnamed protein product (H.sapiens)	AL045306	Hs.22901	Hs.375178	51076126	chrX:51076126-51080005 (+) // 53.83 // p11.22	nudix (nucleoside diphosphate linked moiety X)-type motif 10	NUDT10
210497_x_at	1385.09	972.323	198.628	g12803942	gb:BC002818.1 /DB_XREF=gi:12803942 /FEA=FLmRNA /CNT=11 /TID=Hs.289105.2 /TIER=FL /STK=0 /UG=Hs.289105 /LL=6757 /UG_GENE=SSX2 /DEF=Homo sapiens, Similar to synovial sarcoma, X breakpoint 2, clone MGC:3884, mRNA, complete cds. /PROD=Similar to synovial sarcoma, X breakpoint 2 /FL=gb:BC002818.1	BC002818	Hs.289105	Hs.289105	52780345	chrX:52780345-52790617 (+) // 83.11 // p11.22 /// chrX:52725945-52736211 (-) // 83.11 // p11.22	synovial sarcoma, X breakpoint 2 /// synovial sarcoma, X breakpoint 2B	SSX2 /// SSX2B
207666_x_at	681.892	506.503	83.4758	g10337600	gb:NM_021014.1 /DB_XREF=gi:10337600 /GEN=SSX3 /FEA=FLmRNA /CNT=3 /TID=Hs.178749.0 /TIER=FL /STK=0 /UG=Hs.178749 /LL=10214 /DEF=Homo sapiens synovial sarcoma, X breakpoint 3 (SSX3), mRNA. /PROD=synovial sarcoma, X breakpoint 3 /FL=gb:U90840.1 gb:NM_021014.1	NM_021014	Hs.178749	Hs.558445	52780362	chrX:52780362-52790616 (+) // 89.67 // p11.22 /// chrX:48205862-48216101 (-) // 94.24 // p11.23 /// chrX:52725946-52736194 (-) // 89.67 // p11.22 /// chrX:48045655-48138421 (-) // 86.95 // p11.23	synovial sarcoma, X breakpoint 3	SSX3
223203_at	155.947	121.92	96.7429	g12654108	gb:BC000867.1 /DB_XREF=gi:12654108 /FEA=FLmRNA /CNT=98 /TID=Hs.6451.0 /TIER=FL+Stack /STK=29 /UG=Hs.6451 /LL=29057 /UG_GENE=PRO0659 /DEF=Homo sapiens, PRO0659 protein, clone MGC:4888, mRNA, complete cds. /PROD=PRO0659 protein /FL=gb:BC000867.1 gb:NM_014138.1 gb:AF090943.1	BC000867	Hs.6451	Hs.6451	52936335	chrX:52936335-52937583 (+) // 98.81 // p11.22 /// chrX:52976465-52977713 (-) // 98.81 // p11.22	family with sequence similarity 156, member A /// family with sequence similarity 156, member B	FAM156A /// FAM156B
218012_at	111.766	411.436	453.769	g11545834	gb:NM_022117.1 /DB_XREF=gi:11545834 /GEN=SE20-4 /FEA=FLmRNA /CNT=154 /TID=Hs.136164.0 /TIER=FL+Stack /STK=36 /UG=Hs.136164 /LL=64061 /DEF=Homo sapiens cutaneous T-cell lymphoma-associated tumor antigen se20-4 (SE20-4), mRNA. /PROD=cutaneous T-cell lymphoma-associated tumorantigen se20-4 /FL=gb:NM_022117.1 gb:AF273046.1 gb:AF254794.1	NM_022117	Hs.136164	Hs.136164	53111561	chrX:53111561-53117721 (+) // 83.43 // p11.22	TSPY-like 2	TSPYL2
202383_at	35.2133	109.408	142.763	g11321604	gb:NM_004187.1 /DB_XREF=gi:11321604 /GEN=SMCX /FEA=FLmRNA /CNT=118 /TID=Hs.283429.0 /TIER=FL+Stack /STK=11 /UG=Hs.283429 /LL=8242 /DEF=Homo sapiens SMC (mouse) homolog, X chromosome (SMCX), mRNA. /PROD=SMC (mouse) homolog, X chromosome /FL=gb:L25270.1 gb:NM_004187.1	NM_004187	Hs.283429	Hs.631768	53221452	chrX:53221452-53254604 (-) // 98.87 // p11.22	lysine (K)-specific demethylase 5C	KDM5C
236152_at	116.315	127.413	109.684	Hs.245431.0	gb:AW135330 /DB_XREF=gi:6139463 /DB_XREF=UI-H-BI1-acb-h-10-0-UI.s1 /CLONE=IMAGE:2713963 /FEA=EST /CNT=15 /TID=Hs.245431.0 /TIER=ConsEnd /STK=4 /UG=Hs.245431 /UG_TITLE=ESTs, Weakly similar to PAG1_HUMAN PROSTATE-ASSOCIATED GENE PROTEIN 1 (H.sapiens)	AW135330	Hs.245431	Hs.668491	55246787	chrX:55246787-55250539 (+) // 93.02 // p11.21	P antigen family, member 5 (prostate associated)	PAGE5
208117_s_at	176.767	153.752	275.309	g13654269	gb:NM_031206.1 /DB_XREF=gi:13654269 /GEN=FLJ12525 /FEA=FLmRNA /CNT=1 /TID=HsAffx.900167.150 /TIER=FL /STK=0 /DEF=Homo sapiens hypothetical protein FLJ12525 (FLJ12525), mRNA. /PROD=hypothetical protein FLJ12525 /FL=gb:NM_031206.1	NM_031206	Hs.900167	Hs.522675	64732462	chrX:64732462-64754636 (-) // 93.52 // q12	LAS1-like (S. cerevisiae)	LAS1L
221259_s_at	77.1494	231.22	191.19	g13775183	gb:NM_031276.1 /DB_XREF=gi:13775183 /GEN=TEX11 /FEA=FLmRNA /CNT=1 /TID=HsAffx.900209.94 /TIER=FL /STK=0 /DEF=Homo sapiens testis expressed sequence 11 (TEX11), mRNA. /PROD=testis expressed sequence 11 /FL=gb:NM_031276.1	NM_031276	Hs.900209	Hs.121776	69748790	chrX:69748790-70127629 (-) // 99.97 // q13.1	testis expressed 11	TEX11
207559_s_at	60.6204	79.5328	153.72	g4827066	gb:NM_005096.1 /DB_XREF=gi:4827066 /GEN=ZNF261 /FEA=FLmRNA /CNT=4 /TID=Hs.9568.0 /TIER=FL /STK=0 /UG=Hs.9568 /LL=9203 /DEF=Homo sapiens zinc finger protein 261 (ZNF261), mRNA. /PROD=zinc finger protein 261 /FL=gb:NM_005096.1 gb:AB002383.1	NM_005096	Hs.9568	Hs.522684	70459473	chrX:70459473-70473946 (-) // 100.0 // q13.1	zinc finger, MYM-type 3	ZMYM3
1553998_at	75.1633	324.397	52.4543	Hs2.374521.1	gb:BC029799.1 /DB_XREF=gi:20988685 /TID=Hs2.374521.1 /CNT=14 /FEA=FLmRNA /TIER=FL+Stack /STK=8 /LL=63947 /UG_GENE=DMRTC1 /UG=Hs.374521 /DEF=Homo sapiens, DMRT-like family C1, clone MGC:35486 IMAGE:5196013, mRNA, complete cds. /PROD=DMRT-like family C1 /FL=gb:BC029799.1	BC029799	Hs.374521	Hs.712728	71996832	chrX:71996832-72068635 (+) // 86.16 // q13.2 /// chrX:72091859-72163659 (-) // 86.16 // q13.2	DMRT-like family C1 /// DMRT-like family C1B	DMRTC1 /// DMRTC1B
1552461_at	130.71	117.957	33.1866	Hs2.367959.1	gb:NM_152630.1 /DB_XREF=gi:22749286 /TID=Hs2.367959.1 /CNT=6 /FEA=FLmRNA /TIER=FL /STK=4 /LL=169966 /UG_GENE=MGC26999 /UG=Hs.367959 /UG_TITLE=hypothetical protein MGC26999 /DEF=Homo sapiens hypothetical protein MGC26999 (MGC26999), mRNA. /FL=gb:BC030784.1 gb:NM_152630.1 gb:BC028710.1 gb:BC034979.1	NM_152630	Hs.367959	Hs.367959	79675964	chrX:79675964-79700808 (+) // 99.18 // q21.1	family with sequence similarity 46, member D	FAM46D
217363_x_at	106.962	116.102	123.039	Hs.247783.0	gb:AL031313 /DB_XREF=gi:4038573 /FEA=DNA_2 /CNT=1 /TID=Hs.247783.0 /TIER=ConsEnd /STK=0 /UG=Hs.247783 /UG_TITLE=Human DNA sequence from clone 581F12 on chromosome Xq21. Contains Eukaryotic Translation Initiation Factor EIF3 P35 Subunit and 60S Ribosomal protein L22 pseudogenes. Contains ESTs /DEF=Human DNA sequence from clone 581F12 on chromosome Xq21. Contains Eukaryotic Translation Initiation F…	AL031313	---	---	81761882	chrX:81761882-81762261 (-) // 88.65 // q21.1	---	---
1552445_a_at	67.2556	131.618	25.3077	Hs2.223782.1	gb:NM_153448.1 /DB_XREF=gi:23592227 /GEN=ESX1L /TID=Hs2.223782.1 /CNT=7 /FEA=FLmRNA /TIER=FL /STK=4 /LL=80712 /UG=Hs.223782 /DEF=Homo sapiens extraembryonic, spermatogenesis, homeobox 1-like (ESX1L), mRNA. /PROD=extraembryonic, spermatogenesis, homeobox1-like /FL=gb:NM_153448.1 gb:AY114148.1	NM_153448	Hs.223782	Hs.223782	103494721	chrX:103494721-103499614 (-) // 88.35 // q22.2	ESX homeobox 1	ESX1
231389_at	75.0624	298.329	126.445	Hs.128836.0	gb:AL136112 /DB_XREF=gi:8217460 /FEA=DNA /CNT=11 /TID=Hs.128836.0 /TIER=Stack /STK=9 /UG=Hs.128836 /UG_TITLE=Human DNA sequence from clone RP5-1126E12 on chromosome Xq22.1-22.3. Contains a novel gene, ESTs, GSSs and a putative CpG island /DEF=Human DNA sequence from clone RP5-1126E12 on chromosome Xq22.1-22.3. Contains a novel gene, ESTs, GSSs and a putative CpG island	AL136112	Hs.128836	Hs.128836	106449905	chrX:106449905-106486587 (+) // 98.23 // q22.3	chromosome X open reading frame 41	CXorf41
208763_s_at	13.2509	150.731	105.029	g5817105	gb:AL110191.1 /DB_XREF=gi:5817105 /GEN=DKFZp566A093 /FEA=FLmRNA /CNT=379 /TID=Hs.75450.1 /TIER=FL+Stack /STK=182 /UG=Hs.75450 /LL=1831 /DEF=Homo sapiens mRNA; cDNA DKFZp566A093 (from clone DKFZp566A093); complete cds. /PROD=hypothetical protein /FL=gb:AF228339.1 gb:AF183393.1 gb:AL110191.1 gb:AF153603.1	AL110191	Hs.75450	Hs.522074	106956453	chrX:106956453-106960291 (-) // 95.58 // q22.3	TSC22 domain family, member 3	TSC22D3
206172_at	242.124	1376.17	979.415	g10834991	gb:NM_000640.1 /DB_XREF=gi:10834991 /GEN=IL13RA2 /FEA=FLmRNA /CNT=23 /TID=Hs.25954.0 /TIER=FL /STK=0 /UG=Hs.25954 /LL=3598 /DEF=Homo sapiens interleukin 13 receptor, alpha 2 (IL13RA2), mRNA. /PROD=interleukin 13 receptor, alpha 2 /FL=gb:U70981.1 gb:NM_000640.1	NM_000640	Hs.25954	Hs.336046	114238546	chrX:114238546-114252175 (-) // 96.38 // q23	interleukin 13 receptor, alpha 2	IL13RA2
201121_s_at	520.027	386.93	130.382	g6857798	gb:NM_006667.2 /DB_XREF=gi:6857798 /GEN=HPR6.6 /FEA=FLmRNA /CNT=357 /TID=Hs.90061.0 /TIER=FL+Stack /STK=175 /UG=Hs.90061 /LL=10857 /DEF=Homo sapiens progesterone binding protein (HPR6.6), mRNA. /PROD=progesterone binding protein /FL=gb:NM_006667.2	NM_006667	Hs.90061	Hs.90061	118370262	chrX:118370262-118378428 (+) // 98.57 // q24	progesterone receptor membrane component 1	PGRMC1
240993_at	30.184	221.314	114.023	Hs.229338.0	gb:BF511800 /DB_XREF=gi:11595098 /DB_XREF=UI-H-BI4-apr-g-08-0-UI.s1 /CLONE=IMAGE:3088335 /FEA=EST /CNT=4 /TID=Hs.229338.0 /TIER=ConsEnd /STK=4 /UG=Hs.229338 /UG_TITLE=ESTs	BF511800	---	---	118939273	chrX:118939273-118956979 (-) // 100.0 // q24	---	---
1552724_at	204.693	154.523	49.3034	Hs2.196956.1	gb:AY099086.1 /DB_XREF=gi:20563000 /TID=Hs2.196956.1 /CNT=8 /FEA=FLmRNA /TIER=FL /STK=2 /LL=158800 /UG_GENE=OTEX /UG=Hs.196956 /DEF=Homo sapiens paired-like homeobox protein OTEX mRNA, complete cds. /PROD=paired-like homeobox protein OTEX /FL=gb:NM_139282.1 gb:AY099086.1	AY099086	Hs.196956	Hs.644617	119243010	chrX:119243010-119249847 (-) // 98.09 // q24	Rhox homeobox family, member 1	RHOXF1
219444_at	37.843	128.219	88.3468	g11345489	gb:NM_021946.1 /DB_XREF=gi:11345489 /GEN=FLJ11362 /FEA=FLmRNA /CNT=30 /TID=Hs.8929.0 /TIER=FL+Stack /STK=9 /UG=Hs.8929 /LL=63035 /DEF=Homo sapiens hypothetical protein FLJ11362 (FLJ11362), mRNA. /PROD=hypothetical protein FLJ11362 /FL=gb:NM_021946.1	NM_021946	Hs.8929	Hs.496748	129168475	chrX:129168475-129191601 (+) // 99.36 // q26.1	BCL6 corepressor-like 1	BCORL1
236914_at	34.1803	106.818	84.385	Hs.131601.0	gb:AW080028 /DB_XREF=gi:6035180 /DB_XREF=xe11g09.x1 /CLONE=IMAGE:2606848 /FEA=EST /CNT=6 /TID=Hs.131601.0 /TIER=ConsEnd /STK=6 /UG=Hs.131601 /UG_TITLE=ESTs	AW080028	Hs.131601	---	134531314	chrX:134531314-134531670 (+) // 98.07 // q26.3	hypothetical LOC100509030	LOC100509030
235700_at	442.549	447.668	73.5925	Hs.127812.0	gb:AI581344 /DB_XREF=gi:4565720 /DB_XREF=ta31h11.x1 /CLONE=IMAGE:2045733 /FEA=EST /CNT=9 /TID=Hs.127812.0 /TIER=ConsEnd /STK=1 /UG=Hs.127812 /UG_TITLE=ESTs, Weakly similar to T17330 hypothetical protein DKFZp434B105.1 (H.sapiens)	AI581344	Hs.127812	Hs.460937	134887224	chrX:134887224-134891632 (+) // 88.64 // q26.3 /// chrX:134852693-134857101 (+) // 88.43 // q26.3 /// chrX:134869955-134874361 (+) // 88.43 // q26.3 /// chrX:134928583-134933050 (-) // 89.98 // q26.3 /// chrX:134945850-134950313 (-) // 89.88 // q26.3 /// chrX:134963101-134967563 (-) // 89.88 // q26.3	cancer/testis antigen family 45, member A1 /// cancer/testis antigen family 45, member A2 /// cancer/testis antigen family 45, member A3 /// cancer/testis antigen family 45, member A4 /// cancer/testis antigen family 45, member A5 /// cancer/testis antigen family 45, member A6	CT45A1 /// CT45A2 /// CT45A3 /// CT45A4 /// CT45A5 /// CT45A6
1567913_at	92.5914	96.4791	136.962	Hs2.407394.1	gb:U31738.1 /DB_XREF=gi:940206 /TID=Hs2.407394.1 /CNT=1 /FEA=mRNA /TIER=ConsEnd /STK=0 /UG=Hs.407394 /UG_TITLE=Homo sapiens clone SS108 A10F1 hypoxanthine phosphoribosyltransferase (hprt) 1200 kb deletion mutant mRNA, partial cds. /DEF=Homo sapiens clone SS108 A10F1 hypoxanthine phosphoribosyltransferase (hprt) 1200 kb deletion mutant mRNA, partial cds.	U31738	Hs.407394	Hs.621508	134889938	chrX:134889938-134890076 (-) // 85.71 // q26.3 /// chrX:134855407-134855545 (-) // 85.71 // q26.3	---	---
217393_x_at	60.5066	214.928	297.051	Hs.272352.0	gb:AL109622 /DB_XREF=gi:6002166 /FEA=DNA /CNT=1 /TID=Hs.272352.0 /TIER=ConsEnd /STK=0 /UG=Hs.272352 /UG_TITLE=Human DNA sequence from clone RP3-526F5 on chromosome Xq26.3-28. Contains the gene for a novel protein similar to UBE2N (ubiquitin-conjugating enzyme E2N (homologous to yeast UBC13)), ESTs, STSs and GSSs /DEF=Human DNA sequence from clone RP3-526F5 on chromosome Xq26.3-28. Contains the ge…	AL109622	Hs.272352	Hs.585177	142967178	chrX:142967178-142968355 (+) // 99.41 // q27.3	ubiquitin-conjugating enzyme E2N-like	UBE2NL
1552906_at	66.883	447.264	42.1899	Hs2.375082.1	gb:NM_152578.1 /DB_XREF=gi:22749198 /TID=Hs2.375082.1 /CNT=5 /FEA=FLmRNA /TIER=FL /STK=2 /LL=158521 /UG_GENE=FLJ25736 /UG=Hs.375082 /UG_TITLE=hypothetical protein FLJ25736 /DEF=Homo sapiens hypothetical protein FLJ25736 (FLJ25736), mRNA. /FL=gb:NM_152578.1 gb:BC034320.1	NM_152578	Hs.375082	Hs.128580	147062852	chrX:147062852-147108185 (+) // 98.07 // q27.3	fragile X mental retardation 1 neighbor	FMR1NB
210437_at	308.358	359.222	58.2537	g12803094	gb:BC002351.1 /DB_XREF=gi:12803094 /FEA=FLmRNA /CNT=13 /TID=Hs.37110.0 /TIER=FL /STK=0 /UG=Hs.37110 /LL=4108 /UG_GENE=MAGEA9 /DEF=Homo sapiens, melanoma antigen, family A, 9, clone MGC:8421, mRNA, complete cds. /PROD=melanoma antigen, family A, 9 /FL=gb:BC002351.1 gb:NM_005365.1	BC002351	Hs.37110	Hs.460974	148863599	chrX:148863599-148869397 (+) // 98.47 // q28 /// chrX:148663310-148669109 (-) // 98.47 // q28	melanoma antigen family A, 9 /// melanoma antigen family A, 9B	MAGEA9 /// MAGEA9B
231589_at	4.20347	386.937	321.167	Hs.82171.1	gb:AA977616 /DB_XREF=gi:3155062 /DB_XREF=on61f02.s1 /CLONE=IMAGE:1561179 /FEA=EST /CNT=8 /TID=Hs.82171.1 /TIER=Stack /STK=8 /UG=Hs.82171 /UG_TITLE=Homo sapiens (clone 115392) mRNA	AA977616	Hs.82171	---	149099063	chrX:149099063-149099503 (+) // 98.88 // q28 /// chrX:148629756-148630196 (-) // 98.88 // q28	hypothetical protein LOC100132460	LOC100132460
214642_x_at	100.046	79.5954	25.0397	Hs.37108.0	gb:AI200443 /DB_XREF=gi:3753049 /DB_XREF=qf93b07.x1 /CLONE=IMAGE:1757557 /FEA=FLmRNA /CNT=4 /TID=Hs.37108.0 /TIER=ConsEnd /STK=1 /UG=Hs.37108 /LL=4104 /UG_GENE=MAGEA5 /UG_TITLE=melanoma antigen, family A, 5 /FL=gb:NM_021049.1	AI200443	Hs.37108	Hs.668021	151282520	chrX:151282520-151284077 (-) // 99.68 // q28	melanoma antigen family A, 5	MAGEA5
226466_s_at	103.091	100.266	92.9262	Hs.13580.0	gb:AL544688 /DB_XREF=gi:12877168 /DB_XREF=AL544688 /CLONE=CS0DI022YP07 (5 prime) /FEA=EST /CNT=46 /TID=Hs.13580.0 /TIER=Stack /STK=22 /UG=Hs.13580 /UG_TITLE=Homo sapiens, clone IMAGE:3537447, mRNA, partial cds	AL544688	Hs.13580	Hs.496943	152852768	chrX:152852768-152864583 (-) // 98.28 // q28	family with sequence similarity 58, member A	FAM58A
213843_x_at	24.9125	625.832	806.741	Hs.291904.1	gb:AW276522 /DB_XREF=gi:6663552 /DB_XREF=xr15a02.x1 /CLONE=IMAGE:2760170 /FEA=mRNA /CNT=26 /TID=Hs.291904.1 /TIER=Stack /STK=21 /UG=Hs.291904 /LL=10134 /UG_GENE=DXS1357E /UG_TITLE=accessory proteins BAP31BAP29	AW276522	Hs.291904	Hs.540696	152954013	chrX:152954013-152960911 (+) // 89.09 // q28	solute carrier family 6 (neurotransmitter transporter, creatine), member 8	SLC6A8
205142_x_at	16.0762	71.0484	124.964	g7262392	gb:NM_000033.2 /DB_XREF=gi:7262392 /GEN=ABCD1 /FEA=FLmRNA /CNT=46 /TID=Hs.159546.0 /TIER=FL /STK=6 /UG=Hs.159546 /LL=215 /DEF=Homo sapiens ATP-binding cassette, sub-family D (ALD), member 1 (ABCD1), mRNA. /PROD=ATP-binding cassette, sub-family D (ALD), member1 /FL=gb:NM_000033.2	NM_000033	Hs.159546	Hs.159546	152990335	chrX:152990335-153010181 (+) // 98.98 // q28	ATP-binding cassette, sub-family D (ALD), member 1	ABCD1
206216_at	43.1349	71.1138	121.895	g7657628	gb:NM_014370.1 /DB_XREF=gi:7657628 /GEN=STK23 /FEA=FLmRNA /CNT=25 /TID=Hs.104865.0 /TIER=FL+Stack /STK=13 /UG=Hs.104865 /LL=26576 /DEF=Homo sapiens serinethreonine kinase 23 (STK23), mRNA. /PROD=serinethreonine kinase 23 /FL=gb:AF027406.1 gb:U82808.1 gb:NM_014370.1	NM_014370	Hs.104865	Hs.104865	153046517	chrX:153046517-153051184 (+) // 97.6 // q28	SRSF protein kinase 3	SRPK3
214183_s_at	3512.87	3591.01	1239.14	Hs.102866.1	gb:X91817.1 /DB_XREF=gi:1232174 /FEA=mRNA /CNT=26 /TID=Hs.102866.1 /TIER=Stack /STK=22 /UG=Hs.102866 /LL=8277 /UG_GENE=TKTL1 /DEF=H.sapiens mRNA for transketolase-like protein (2418 bp). /PROD=transketolase	X91817	Hs.102866	Hs.102866	153533569	chrX:153533569-153558700 (+) // 98.72 // q28	transketolase-like 1	TKTL1
200859_x_at	54.5319	117.465	153.125	g4503744	gb:NM_001456.1 /DB_XREF=gi:4503744 /GEN=FLNA /FEA=FLmRNA /CNT=439 /TID=Hs.195464.0 /TIER=FL /STK=2 /UG=Hs.195464 /LL=2316 /DEF=Homo sapiens filamin A, alpha (actin-binding protein-280) (FLNA), mRNA. /PROD=filamin 1 (actin-binding protein-280) /FL=gb:NM_001456.1	NM_001456	Hs.195464	Hs.195464	153576964	chrX:153576964-153602929 (-) // 99.94 // q28	filamin A, alpha	FLNA
209477_at	63.6306	106.585	197.624	g12653890	gb:BC000738.1 /DB_XREF=gi:12653890 /FEA=FLmRNA /CNT=156 /TID=Hs.2985.0 /TIER=FL /STK=0 /UG=Hs.2985 /LL=2010 /UG_GENE=EMD /DEF=Homo sapiens, emerin (Emery-Dreifuss muscular dystrophy), clone MGC:2126, mRNA, complete cds. /PROD=emerin (Emery-Dreifuss muscular dystrophy) /FL=gb:BC000738.1 gb:NM_000117.1	BC000738	Hs.2985	Hs.522823	153607722	chrX:153607722-153609881 (+) // 94.17 // q28	emerin	EMD
207809_s_at	33.4461	273.172	61.5303	g4557340	gb:NM_001183.1 /DB_XREF=gi:4557340 /GEN=ATP6S1 /FEA=FLmRNA /CNT=3 /TID=Hs.6551.0 /TIER=FL /STK=0 /UG=Hs.6551 /LL=537 /DEF=Homo sapiens ATPase, H+ transporting, lysosomal (vacuolar proton pump), subunit 1 (ATP6S1), mRNA. /PROD=ATPase, H+ transporting, lysosomal subunit 1 /FL=gb:NM_001183.1	NM_001183	Hs.6551	Hs.6551	153658929	chrX:153658929-153664861 (+) // 83.92 // q28	ATPase, H+ transporting, lysosomal accessory protein 1	ATP6AP1
36004_at	28.9107	88.7623	172.16	4872434_RC	Cluster Incl. AF074382:Homo sapiens IkB kinase gamma subunit (IKK-gamma) mRNA, complete cds /cds=(148,1407) /gb=AF074382 /gi=3641279 /ug=Hs.43505 /len=1976	AF074382	Hs.43505	Hs.43505	153770477	chrX:153770477-153793102 (+) // 77.13 // q28	inhibitor of kappa light polypeptide gene enhancer in B-cells, kinase gamma	IKBKG
211674_x_at	101.884	315.691	97.1298	g4104676	gb:AF038567.1 /DB_XREF=gi:4104676 /FEA=FLmRNA /CNT=1 /TID=HsAffx.900465.527 /TIER=FL /STK=0 /DEF=Homo sapiens cancer antigen-3 and cancer antigen-3-ORF2 mRNA, complete cds. /PROD=cancer antigen-3 /FL=gb:AF038567.1	AF038567	Hs.900465	Hs.534310	153813419	chrX:153813419-153815074 (+) // 92.43 // q28 /// chrX:153845865-153847520 (-) // 92.43 // q28	cancer/testis antigen 1A /// cancer/testis antigen 1B	CTAG1A /// CTAG1B
215733_x_at	103.924	326.806	111.043	Hs.87225.1	gb:AJ012833.1 /DB_XREF=gi:3893216 /GEN=CAMEL /FEA=mRNA /CNT=5 /TID=Hs.87225.1 /TIER=ConsEnd /STK=0 /UG=Hs.87225 /LL=30848 /DEF=Homo sapiens mRNA for CTL-recognized antigen on melanoma (CAMEL). /PROD=CTL-recognized antigen on melanoma (CAMEL)	AJ012833	Hs.87225	Hs.87225	153880250	chrX:153880250-153881853 (-) // 98.06 // q28	cancer/testis antigen 2	CTAG2
216862_s_at	251.771	145.517	434.515	Hs.3548.2	gb:Z24459 /DB_XREF=gi:2252491 /FEA=DNA_4 /CNT=1 /TID=Hs.3548.2 /TIER=ConsEnd /STK=0 /UG=Hs.3548 /LL=4515 /UG_GENE=MTCP1 /UG_TITLE=mature T-cell proliferation 1 /DEF=H.sapiens MTCP1 gene, exons 2A to 7 (and joined mRNA)	Z24459	Hs.3548	Hs.6917	154289901	chrX:154289901-154299539 (-) // 91.34 // q28	mature T-cell proliferation 1 neighbor	MTCP1NB
