# Supplementary material for: Human postmeiotic sex chromatin and its impact on sex chromosome evolution
Source: HighWire-hosted journal article supplement (doi:10.1101/gr.135046.111), 2012-02-28
Supplement: Sin_tableS2.xlsx [file Sin_tableS2.xlsx]

## Sheet: Sheet1
Table S2. Expression profiles of human Y-linked genes
Location	Y-linked gene	SG	PS	RS	Probe set
X-transposed	PCDH11Y	6.43462	7.19905	6.29223	217049_x_at
	TGIF2LY	26.6602	304.001	594.805	233178_at
X-degenerate	SRY	7.78897	7.61417	13.2648	207893_at
	RPS4Y1	1872.23	624	742.977	201909_at
	ZFY	34.1216	28.4709	20.1592	230760_at
	PRKY	12.3296	3.72997	5.39822	206279_at
	AMELY	9.74264	8.38487	8.43625	208220_x_at
	TBL1Y	18.9521	10.7396	15.0339	211462_s_at
	TTTY15	26.4386	11.9706	22.7656	214983_at
	USP9Y	146.878	9.34504	6.07445	228492_at
	DDX3Y	1860.81	223.45	74.6231	205000_at
	UTY	94.5519	32.1549	23.4798	208067_x_at
	TMSB4Y	17.2835	14.9047	24.6375	206769_at
	NLGN4Y	3.62953	3.76408	3.49621	207703_at
	TTTY14	24.402	38.4658	54.8836	224003_at
	TXLNG2P	392.467	8.84865	12.3085	214131_at
	KDM5D	310.489	74.9864	39.3684	206700_s_at
	TTTY10	7.67463	8.54539	10.613	224293_at
	EIF1AY	20.3277	13.2027	19.7321	204410_at
Ampliconic	TTTY1	6.92163	12.4689	17.7989	216673_at
	TTTY7	4.30582	4.72233	10.636	1561185_at
	TTTY12	5.04043	12.7414	24.2737	224195_at
	TTTY11	12.0354	16.0961	24.5766	224174_at
	RBMY3AP	10.399	13.5142	18.4755	1565132_at
	TSPY gene family*	4716.3	1509.47	465.601	207918_s_at
	TTTY8	19.9785	25.1969	49.4022	224143_at
	TTTY2	11.2819	56.5306	331.391	217261_at
	XKRY	3.65998	3.37063	4.06174	208339_at
	HSFY1/HSFY2	6.08518	1222.92	2287.1	224007_at
	TTTY9	7.23371	7.91613	10.0831	211460_at
	RBMY1 gene family*	796.947	533.843	85.9761	208307_at
	TTTY13	6.53963	8.40474	22.8391	224292_at
	PRY	10.5529	25.3726	32.1667	208332_at
	TTTY5	11.8134	27.0373	52.8315	224040_at
	TTTY6	8.64641	8.99065	12.0956	224041_at
	TTTY4	11.9488	12.3283	10.5299	234913_at
	DAZ gene family*	164.57	779.638	123.75	208281_x_at
	CSPG4P4Y	18.3155	23.8189	42.2607	211461_at
	BPY2	4.74649	65.5809	660.046	208331_at
	CDY1	8.24411	61.8979	25.9566	207646_s_at
* indicates the representative nomenclature which has almost identical copies. TSPY gene family: TSPY1, TSPY2, TSPY3 and TSPY4; RBMY1 gene family: RBMY1A1, RBMY1J and RBMY1F; DAZ gene family: DAZ1, DAZ2, DAZ3 and DAZ4
