# Supplementary material for: Human postmeiotic sex chromatin and its impact on sex chromosome evolution
Source: HighWire-hosted journal article supplement (doi:10.1101/gr.135046.111), 2012-02-28
Supplement: Sin_tableS3.xlsx [file Sin_tableS3.xlsx]

## Sheet: Sheet1
Table S3. Expression profiles of human X-linked genes which have homologues on the Y chromosome
X homologues	Location	SG	PS	RS	Probe set	Y homologues	Location	SG	PS	RS	Probe set
KDM6A	chrXp11.2	76.9763	11.4932	3.67376	203991_s_at	UTY	chrYq11	94.5519	32.1549	23.4798	208067_x_at
TSPYL2	chrXp11.2	111.766	411.436	453.769	218012_at	TSPY gene family*	chrYp11.2	4716.3	1509.47	465.601	207918_s_at
KDM5C	chrXp11.22-p11.21	35.2133	109.408	142.763	202383_at	KDM5D	chrYq11|Yq11	310.489	74.9864	39.3684	206700_s_at
DDX3X	chrXp11.3-p11.23	2884.24	519.621	199.591	201210_at	DDX3Y	chrYq11	1860.81	223.45	74.6231	205000_at
USP9X	chrXp11.4	1727.58	143.314	45.1397	201099_at	USP9Y	chrYq11.2	146.878	9.34504	6.07445	228492_at
ZFX	chrXp21.3	199.885	15.9693	21.3224	229022_at	ZFY	chrYp11.3	22.3771	47.3312	877.353	207246_at
EIF1AX	chrXp22.1	N/A				EIF1AY	chrYq11.223	20.3277	13.2027	19.7321	204410_at
TXLNG	chrXp22.1	N/A				TXLNG2P	chrYq11.222	392.467	8.84865	12.3085	214131_at
TMSB4X	chrXp22.2	N/A				TMSB4Y	chrYq11.221	17.2835	14.9047	24.6375	206769_at
TBL1X	chrXp22.3	133.148	29.0028	37.9139	201868_s_at	TBL1Y	chrYp11.2	18.9521	10.7396	15.0339	211462_s_at
PRKX	chrXp22.3	76.632	12.105	24.6777	204061_at	PRKY	chrYp11.2	12.3296	3.72997	5.39822	206279_at
AMELX	chrXp22.31-p22.1	11.7723	10.3068	10.1606	208410_x_at	AMELY	chrYp11.2	9.74264	8.38487	8.43625	208220_x_at
VCX	chrXp22.32	948.606	763.78	409.463	207281_x_at	VCY	chrYq11.21 /// chrYq11.221	1899.74	794.162	375.288	206922_at
NLGN4X	chrXp22.33	30.0669	12.0737	5.16572	221933_at	NLGN4Y	chrYq11.221	3.62953	3.76408	3.49621	207703_at
RPS4X	chrXq13.1	5472.65	637.374	1124.24	213347_x_at	RPS4Y1	chrYp11.3	1872.23	624	742.977	201909_at
PCDH11X	chrXq21.3	10.6312	4.42268	6.42544	208366_at	PCDH11Y	chrYp11.2	6.43462	7.19905	6.29223	217049_x_at
TGIF2LX	chrXq21.3	N/A				TGIF2LY	chrYp11.2	26.6602	304.001	594.805	233178_at
XKRX	chrXq22.1	21.6057	4.65182	7.35996	230349_at	XKRY	chrYq11.221 /// chrYq11.222	3.65998	3.37063	4.06174	208339_at
RBMX	chrXq26.3	5.79449	5.16746	5.5207	1556336_at	RBMY1 gene family*	chrYq11.223	796.947	533.843	85.9761	208307_at
SOX3	chrXq27.1	17.1141	20.7721	37.9711	214633_at	SRY	chrYp11.3	7.78897	7.61417	13.2648	207893_at
HSFX1/HSFX2	chrXq28	16.503	122.557	393.645	220314_at	HSFY1/HSFY2	chrYq11.222	6.08518	1222.92	2287.1	224007_at
* indicates the representative nomenclature which has almost identical copies. TSPY gene family: TSPY1, TSPY2, TSPY3 and TSPY4; RBMY1 gene family: RBMY1A1, RBMY1J and RBMY1F. N/A, Not Assigned.
