# Supplementary material for: Human postmeiotic sex chromatin and its impact on sex chromosome evolution
Source: HighWire-hosted journal article supplement (doi:10.1101/gr.135046.111), 2012-02-28
Supplement: Sin_tableS4.xlsx [file Sin_tableS4.xlsx]

## Sheet: Sheet1
Table S4. List of human X-linked multicopy genes and their expression profiles. Definition of groups is described in this study.
Representatives	X-linked gene	SG	PS	RS	Group	Copy number	Probe set
NXF2/NXF2B	NXF2 /// NXF2B	312.017	191.84	111.582			234173_s_at
	NXF2	289.093	193.607	113.896			220981_x_at
	NXF2 /// NXF2B	281.96	203.212	115.585			220257_x_at
	Average expression	294.357	196.219	113.688	Group A	6
GPRASP1/GPRASP2	GPRASP1	36.0219	14.6714	5.86006			204793_at
	GPRASP2	460.488	211.677	49.0794			228027_at
	Average expression	248.255	113.174	27.4697	Group A	2
NXT2	NXT2	1088.34	398.477	368.001			209628_at
	NXT2	285.6	223.326	182.21			209629_s_at
	Average expression	686.971	310.901	275.106	Group A	4
RHOXF2/RHOXF2B	RHOXF2 /// RHOXF2B	937.751	571.937	181.66	Group A	2	236920_at
CT47A gene family	CT47A1 /// CT47A2 /// CT47A3 /// CT47A4 /// CT47A5 /// CT47A6 /// CT47A7 /// CT47A8 /// CT47A9 /// CT47A10	2722.69	435.356	160.772	Group A	10	231568_at
CT45A gene family	CT45A5	442.549	447.668	73.5925			235700_at
	CT45A1 /// CT45A2 /// CT45A3 /// CT45A4 /// CT45A6	359.608	368.299	53.6119			1567912_s_at
	Average expression	401.079	407.984	63.6022	Group D	6
SPANXB1/SPANXB2	SPANXB1 /// SPANXB2	33.3878	808.027	5317.63	Group C	2	220921_at
CXorf51A/CXorf51B	CXorf51A /// CXorf51B	83.8013	718.241	4599.69	Group C	2	231159_at
CXorf40A/CXorf40B	CXorf40A	224.198	113.416	67.7986			213315_x_at
	CXorf40B	160.587	114.842	86.9272			212961_x_at
	CXorf40A /// CXorf40B	168.42	54.289	56.5137			214112_s_at
	Average expression	184.402	94.1824	70.4132	Group A	4
HSFX1/HSFX2	HSFX1 /// HSFX2	16.503	122.557	393.645	Group C	4	220314_at
TMEM185A	TMEM185A	43.7908	39.5459	37.2725			1554105_at
	TMEM185A	34.0452	23.1363	16.6179			227880_s_at
	Average expression	38.918	31.3411	26.9452	Group D	2
MAGEA9/MAGEA9B	MAGEA9 /// MAGEA9B	308.358	359.222	58.2537	Group D	2	210437_at
TEX28	TEX28	10.5191	79.1581	500.428	Group C	~ 4	207364_at
IKBKG	IKBKG	28.9107	88.7623	172.16			36004_at
	IKBKG	35.4823	41.3009	56.6429			209929_s_at
	Average expression	32.1965	65.0316	114.402	Group D	2
CTAG1A/CTAG1B	CTAG1A /// CTAG1B	85.7411	302.472	110.849			210546_x_at
	CTAG1A /// CTAG1B	101.884	315.691	97.1298			211674_x_at
	Average expression	93.8126	309.082	103.99	Group D	4
F8 gene family	F8	8.67717	9.57873	7.61692			205756_s_at
	F8A1 /// F8A2 /// F8A3	38.6574	32.0659	65.4606			203274_at
	Average expression	23.6673	20.8223	36.5388	Group D	4
H2AFB gene family	H2AFB1 /// H2AFB2 /// H2AFB3	22.1525	216.005	551.414	Group C	3	214412_at
MAGEB gene family	MAGEB2	1172.42	290.355	56.8726			206218_at
	MAGEB3	89.1493	19.0822	13.5444			207579_at
	MAGEB1	330.611	32.0633	47.4455			207534_at
	Average expression	530.727	113.833	39.2875	Group A	2
SSX4/SSX4B	SSX4 /// SSX4B	153.771	154.088	28.0324			211425_x_at
	SSX4 /// SSX4B	141.166	276.189	55.019			210394_x_at
	Average expression	147.468	215.138	41.5257	Group D	2
GAGE1 gene family	GAGE1 /// GAGE12C /// GAGE12D /// GAGE12E /// GAGE12F /// GAGE12G /// GAGE12H /// GAGE12I /// GAGE12J /// GAGE2A /// GAGE2C /// GAGE2D /// GAGE2E /// GAGE4 /// GAGE5 /// GAGE6 /// GAGE7 /// GAGE8	2663.34	3267.03	909.297			207086_x_at
	GAGE12F /// GAGE12G /// GAGE12I /// GAGE5 /// GAGE7	1762.53	1617.45	440.283			208235_x_at
	GAGE12C /// GAGE12D /// GAGE12E /// GAGE12F /// GAGE12G /// GAGE12H /// GAGE12I /// GAGE2A /// GAGE2C /// GAGE4 /// GAGE5 /// GAGE6 /// GAGE7	2922.35	2312.72	633.475			206640_x_at
	GAGE1 /// GAGE12F /// GAGE12G /// GAGE12I /// GAGE12J /// GAGE2A /// GAGE2B /// GAGE2C /// GAGE2D /// GAGE2E /// GAGE3 /// GAGE4 /// GAGE5 /// GAGE6 /// GAGE7 /// GAGE8	3731.23	3319.99	1070.85			207739_s_at
	GAGE1 /// GAGE12F /// GAGE12G /// GAGE12I /// GAGE12J /// GAGE4 /// GAGE5 /// GAGE6 /// GAGE7	2631.35	3118.98	846.794			208155_x_at
	Average expression	2742.16	2727.23	780.139	Group D	~ 16
CENPVL1	CENPVL1	6.47863	11.7293	16.4253	Group D	2	236756_at
MAGED4/MAGED4B	MAGED4 /// MAGED4B	16.9759	23.6198	35.2596			223313_s_at
	MAGED4 /// MAGED4B	20.7983	18.4887	28.1428			221261_x_at
	Average expression	18.8871	21.0543	31.7012	Group D	2
XAGE1 gene family	XAGE1A /// XAGE1B /// XAGE1C /// XAGE1D /// XAGE1E	72.9473	434.701	292.633	Group D	~ 20	220057_at
SSX2/SSX2B	SSX2 /// SSX2B	152.136	248.674	51.8905			215881_x_at
	SSX2 /// SSX2B	342.807	852.433	104.238			207493_x_at
	SSX2 /// SSX2B	1385.09	972.323	198.628			210497_x_at
	SSX2 /// SSX2B	114.647	257.286	75.6277			216471_x_at
	Average expression	498.67	582.679	107.596	Group D	4
FAM156A/FAM156B	FAM156A /// FAM156B	155.947	121.92	96.7429	Group D		223203_at
SPIN2A/SPIN2B	SPIN2A /// SPIN2B	31.4778	15.1572	25.0835	Group D	2	211704_s_at
DMRTC1/DMRTC1B	DMRTC1 /// DMRTC1B	75.1633	324.397	52.4543			1553998_at
	DMRTC1 /// DMRTC1B	26.4698	131.314	80.1738			1560300_a_at
	Average expression	50.8166	227.855	66.314	Group D	4
LOC100129407	LOC100129407	18.0542	29.4321	505.099	Group C	3	236758_at
CTAG2	CTAG2	103.924	326.806	111.043	Group D	3	215733_x_at
