# Supplementary material for: Human postmeiotic sex chromatin and its impact on sex chromosome evolution
Source: HighWire-hosted journal article supplement (doi:10.1101/gr.135046.111), 2012-02-28
Supplement: Sin_tableS5.xlsx [file Sin_tableS5.xlsx]

## Sheet: Sheet1
Table S5. List of multicopy genes on the mouse X chromosome and their expression profiles. Definition of groups is described in our previous study (Namekawa et al 2006).
Representatives	X-linked genes	SG	PS	RS	Group	Copy number	Probe set
Gmcl1l	Gmcl1l	21.625	109.15	2068.05	Group C	~ 21	1424537_at
EG668965	EG668965	35.675	582.05	547.3	Group D	~ 8	1454216_at
Ssxb1	Ssxb1	57.525	34.45	509.3	Group C	13	1449912_at
Fthl17	Fthl17	357.65	14.75	57.2	Group A	6	1419540_at
Slx	Slx	68.05	172.9	3188.1			1422617_at
	Slx	71.875	188.25	3748.35			1422618_x_at
	Average expression	69.9625	180.575	3468.22	Group C	~ 25
E330016L19Rik	E330016L19Rik	5	7.1	6.3	No expression	~ 21	1433865_at
Rhox6/Rhox9	Rhox9	30.275	22.9	27.1		2	1449540_at
	Rhox6	7.875	23.15	6.3		1	1419018_at
	Average expression	19.075	23.025	16.7	No expression	3
Rhox4	Rhox4	45.2	12.55	7.25	No expression	~ 7	1419229_at
Rhox2	Rhox2	312.875	55.25	128.2	Group A	~ 9	1420448_at
Slxl1	Slxl1	50.05	195.85	3565.3	Group C	~ 14	1453217_at
Cxx1 gene family	Cxx1a /// Cxx1b	330.575	100.9	98.2			1423816_at
	Cxx1c	75.15	15.8	7.4			1450080_at
	Average expression	202.863	58.35	52.8	Group A	3
Magea gene family	Magea1 /// Magea2 /// Magea3 /// Magea5 /// Magea6 /// Magea8	201.95	37.45	88.6			1450542_s_at
	Magea4	81.975	5.85	50.9			1450594_at
	Magea5	254.075	15.6	55.8			1422325_at
	Magea6	73.125	11.25	18.15			1422357_at
	Magea7	22.8	51.1	61.4			1422423_at
	Average expression	126.785	24.25	54.97	Group A	~ 8
Xlr3 gene family	Xlr3a /// Xlr3b /// Xlr3c	473.75	26.55	81.45	Group A	~ 3	1420357_s_at
Xlr5 gene family	Xlr5a /// Xlr5b /// Xlr5c	308.625	14.6	101.9			1422933_at
	Xlr5a /// Xlr5b /// Xlr5c	92.175	4.3	34.95			1443483_at
	Average expression	200.4	9.45	68.425	Group A	~ 3
Xlr4 gene family	Xlr4a /// Xlr4b /// Xlr4c	987.725	37	240.65	Group A	~ 3	1449347_a_at
EG434797	EG434797	33.15	21.85	224.75	Group C	2	1429745_at
Obp1a	Obp1a	0.8	2.4	2.5	No expression	~ 7	1453644_at
Mageb gene family	Mageb1 /// Mageb2 /// Mageb3	91.425	109.7	101.3			1422345_s_at
	Mageb16	185.85	133.9	53.15			1429701_at
	Mageb3	88.275	109.2	102.7			1450293_at
	Gm14781 /// Mageb5	10.4	26.1	489.3			1453280_at
	Average expression	93.9875	94.725	186.613	Group D	8
Pabpc1l2	Pabpc1l2	89.275	11.55	24.6	Group A	2	1447725_at
Tgif2lx1/Tgif2lx2	Tgif2lx1 /// Tgif2lx2	8.85	41.35	790.5	Group C	2	1427968_at
Premel3	Pramel3	985.4	63	1004.1	Group B	9	1449962_at
Ott	Ott	1245.38	101.1	654.55	Group B	~12	1427346_at
LOC245376	LOC245376	118.425	123.2	1006.35	Group C	~ 3	1460378_a_at
1700020N15Rik	1700020N15Rik	26.65	37.95	521.65	Group C	2	1430524_at
1700042B14Rik	1700042B14Rik	27.025	26.3	429.75	Group C	4	1432326_at
1700003E24RIk	1700003E24RIk	22.975	120.75	2803.8	Group C	4	1437988_x_at
1700010D01RIk	1700010D01RIk	15	74.15	1618.5	Group C	4	1437988_x_at
4930524N10Rik	4930524N10Rik	5.15	16.5	373.2	Group C	3	1432433_at
4933416I08Rik	4933416I08Rik	19.175	6.95	117	Group C	2	1454154_at
H2al1	H2al1	8.225	41.05	790.8	Group C	13	1419187_at
4921511M17Rik	4921511M17Rik	19.3	37.4	370.7	Group C	4	1430624_at
Ctag2	Ctag2	31.475	67.85	442.5	Group C	4	1429928_at
