# Supplementary material for: Human postmeiotic sex chromatin and its impact on sex chromosome evolution
Source: HighWire-hosted journal article supplement (doi:10.1101/gr.135046.111), 2012-02-28
Supplement: Sin_tableS6.xlsx [file Sin_tableS6.xlsx]

## Sheet: Sheet1
Table S6. Expression profiles of human X-retrotransposed genes and their X-linked homologues
X-linked gene	SG	PS	RS	Probe set	X-transposed gene	Location	SG	PS	RS	Probe set
UBL4A	66.3406	71.0241	79.8364	221746_at	UBL4B	Chr1	N/A
TMEM185A	43.7908	39.5459	37.2725	1554105_at	TMEM185B	Chr2	273.925	211.586	41.0523	219253_at
PDHA1	1112.37	62.3562	31.2863	1555864_s_at	PDHA2	Chr4	24.4532	3227.36	2262.19	214518_at
TKTL1	3512.87	3591.01	1239.14	214183_s_at	TKTL2	Chr4	46.2754	1793.92	702.041	223829_at
GK	58.0902	19.6528	27.0043	214681_at	GK3P	Chr4	14.0475	290.016	213.417	215966_x_at
COX7B	333.486	139.239	135.647	202110_at	COX7B2	Chr4	110.785	2145.96	686.801	231265_at
TAF7L	187.283	113.618	243.79	220325_at	TAF7	Chr5	354.808	403.047	244.719	201023_at
FUNDC1	305.674	64.9431	44.1863	235346_at	FUNDC2	Chr5	543.508	386.577	4069.85	223042_s_at
NKAP	325.458	47.2799	32.9075	223439_at	NKAPL	Chr6	92.8653	631.531	222.824	229340_at
PGK1	342.193	83.5937	112.498	200737_at	PGK2	Chr6	14.7473	2706.46	5647.07	217009_at
RNF128	N/A				RNF133	Chr7	6.52658	587.275	2673.3	231373_at
PRPS1	65.8959	39.0214	42.7057	208447_s_at	PRPS1L1	Chr7	16.086	1481.71	201.783	215486_at
KLHL13	136.89	15.2383	6.42847	227875_at	KLHL9	Chr9	44.2691	38.5607	31.0138	213117_at
RRAGB	N/A				RRAGA	Chr9	197.35	1097.54	414.889	201628_s_at
FAM122B	17.5567	10.2049	25.513	225362_at	FAM122A	Chr9	6.25351	202.5	90.4572	226443_at
CSTF2	522.184	162.559	108.219	204459_at	CSTF2T	Chr10	9.68415	12.7073	8.45426	212905_at
RBMX	261.962	21.773	20.7906	204098_at	RBMXL2	Chr11	35.1292	1677.61	951.537	207208_at
EIF2S3	1025.18	28.2618	48.1953	224935_at	EIF2S3	Chr12	49.191	83.3817	30.1209	205321_at
CETN2	469.379	261.596	360.755	209194_at	CETN1	Chr18	12.3199	1621.16	689.201	207209_at
ZNF75D	N/A				ZNF358	Chr19	40.3864	56.654	111.888	219379_x_at
N/A, Not Assigned.
