# Supplementary material for: Human postmeiotic sex chromatin and its impact on sex chromosome evolution
Source: HighWire-hosted journal article supplement (doi:10.1101/gr.135046.111), 2012-02-28
Supplement: Sin_tableS7.xlsx [file Sin_tableS7.xlsx]

## Sheet: Sheet1
Table S7. Expression profiles of mouse X-retrotransposed genes and their X-linked homologues
X-linked gene	SG	PS	RS	Probe set	X-transposed gene	Location	SG	PS	RS	Probe set
Ddx3x	523.55	161.3	89.7	1416467_at	D1Pas1	Chr1	217.75	1441.25	935.95	1437693_at
E230019M04Rik	N/A				4930521A18Rik	Chr1	20.05	353.45	63.65	1430400_at
Nxt2	101.5	7.85	65	1456599_at	Nxt1	Chr2	327.375	1631.3	1240.7	1422488_at
Pdha1	370.8	56.4	81.05	1418560_at	Pdha2	Chr3	224	2270.25	1934.75	1450962_at
Rragb	N/A				Rraga	Chr4	295.25	190.4	181.4	1428905_at
4933400A11Rik	1.3	8.3	294.35	1420777_a_at	Capza3	Chr6	18.85	98	1727.8	1418556_at
Gpr173	1.85	6.25	1.5	1429986_at	Gpr27	Chr6	7.05	8.85	15.3	1422154_at
Igbp1	52.075	51.25	23.85	1419999_at	Igbp1b	Chr6	20.625	252.7	377.6	1430512_a_at
Rnf128	244.175	74.7	76.6	1418318_at	Rnf133	Chr6	9.175	48.2	1095.75	1456802_at
Rbmx2	186.175	19.3	45.1	1424705_at	Rbmxl2	Chr7	377.75	639.05	757.15	1429343_at
Usp26	135.1	12.2	41	1421502_at	Usp29	Chr7	24.475	18.5	25.4	1427551_at
Tlr13	30.625	10.65	18.85	1457753_at	Tlr9	Chr9	49.025	30.35	63.3	1422083_at
Cypt3	34.625	75.35	1154.85	1456192_x_at	Cypt4	Chr9	20.825	72.5	474.55	1436927_at
Taf7l	1575.02	95.95	598.05	1420433_at	4933416C03Rik	Chr10	317.6	2535.8	1749.95	1441985_at
Zrsr2	29.875	17.55	16.55	1442154_at	Zrsr1	Chr11	163.275	187.75	145.35	1449354_at
Gm5941	15	74.15	1618.5	1429636_at	1700019M22Rik	Chr12	6.8	92.9	2513.65	1429513_at
Nkap	45.6	10.8	26.4	1419763_at	Nkapl	Chr13	88.85	1194.85	1077.45	1449561_at
Acot9	371.3	65.15	773.45	1418073_at	Acot10	Chr15	379.6	66.65	1223.1	1449968_s_at
Apool	164.075	4.9	32.6	1418384_at	Apool-ps	Chr15	N/A
Ndufb11	727.85	102.1	94.2	1455911_x_at	1700029P11Rik	Chr15	128.925	2163.5	792.25	1449276_at
Bex4	484.775	197.6	123.85	1428209_at	Bex6	Chr16	6.375	52.4	13.2	1459923_at
Cldn2	32.55	38.1	44.3	1417232_at	Cldn8	Chr16	1.7	2.05	2.15	1449091_at
Pgk1	773.05	134.1	109.75	1438640_x_at	Pgk2	Chr17	63.65	782.35	2936.6	1416784_at
Gyk	37.4	49.95	38.4	1445242_at	Gykl1	Chr18	128.575	2117.35	3490.45	1423514_at
Cetn2	184.8	8.25	56.75	1418579_at	Cetn1	Chr18	252.6	2466.2	2802.3	1423203_a_at
Cstf2	168.15	89.15	421.45	1419644_at	Cstf2t	Chr19	651.375	1431.8	522.7	1415920_at
Fam122b	83.5	30.35	35.35	1452682_at	Fam122a	Chr19	268.425	200.45	206.9	1430769_s_at
N/A, Not Assigned.
