# Supplementary material for: Human postmeiotic sex chromatin and its impact on sex chromosome evolution
Source: HighWire-hosted journal article supplement (doi:10.1101/gr.135046.111), 2012-02-28
Supplement: Sin_tableS8.xlsx [file Sin_tableS8.xlsx]

## Sheet: Sheet1
Table S8. Comparison of Group C genes between mice and humans. Genes which show consistent expression patterns between humans and mice are listed in upper panels. Genes which show inconsistent expression patterns between humans and mice are listed in lower panels.
Gene		Full name	Orthologoues	Expression pattern	List		Human Copy numbers	Mouse Copy numbers
Consistent expression pattern between humans and mice.
There genes are in Group C both in humans (Current Study) and in mice (Namekawa et al. 2006).
Human	Mouse
CXorf27	H2al3	chromosome X open reading frame 27	Eutheria		A		1	1
PPP1R2P9	Ppp1r2-ps9	protein phosphatase 1, regulatory (inhibitor) subunit 2 pseudogene 9	Eutheria		A		1	1
DUSP21	Dusp21	dual specificity phosphatase 21	Eutheria		A		1	1
AKAP4	Akap4	A kinase (PRKA) anchor protein 4 (AKAP4)	Eutheria		A		1	1
RIBC1	Ribc1	RIB43A domain with coiled-coils 1 (RIBC1)	Eutheria		A		1	1
ASB12	Asb12	ankyrin repeat and SOCS box containing 12	Eutheria		A		1	1
ZCCHC13	Zcchc13	zinc finger, CCHC domain containing 13	Eutheria		A		1	1
CYLC1	Cylc1	cylicin, basic protein of sperm head cytoskeleton 1	Eutheria		A		1	1
TEX13A	Tex13a	testis expressed 13A	Eutheria		A		1	1
CXorf61	1110059M19Rik	chromosome X open reading frame 61	Eutheria		A		1	1
AKAP14	LOC434756	A kinase (PRKA) anchor protein 14	Eutheria		A		1	1
H2AFB gene family	4930557A04Rik	H2A histone family, member B1	Eutheria		A		3	1
Inconsistent expression pattern between human and mouse
These genes are in Group C in mice (Namekawa et al. 2006), but not in Group C in humans (Current Study)
Human	Mouse			Expression in Human
	3830417A13Rik		Rodent specific	No	B			1
	4933436I01Rik		Rodent specific	No	B			1
	1700020N15Rik		Rodent specific	No	B			2
	4930468A15Rik		Rodent specific	No	B			1
	4930480E11Rik		Rodent specific	No	B			1
	1600014K23Rik	Ppp1r2-ps	Rodent specific	No	B			1
	1700072E05Rik		Rodent specific	No	B			1
	4930402K13Rik		Rodent specific	No	B			1
	4930519F16Rik		Rodent specific	No	B			1
	Gm732		Rodent specific	No	B			1
	Prame	preferentially expressed antigen in melanoma	Rodent specific	No	B			1
	1700008I05Rik		Rodent specific	No	B			1
	4930513O06Rik		Rodent specific	No	B			1
	4930524N10Rik		Rodent specific	No	B			3
	4930542N07Rik		Rodent specific	No	B			1
	4933416I08Rik		Rodent specific	No	B			2
	EG434797	Gm5640	Rodent specific	No	B			2
	1700042B14Rik		Rodent specific	No	B			4
	Slxl1	Slx like 1	Rodent specific	No	B			~ 14
	Slx	Sycp3 like X-linked	Rodent specific	No	B			~ 25
	Gmcl1l		Rodent, Drosophila	No	—			~ 21
	LOC245376	Gm4985	Rodent, Opossum, Chicken	No	—			~ 3
	Cypt1	cysteine-rich perinuclear theca 1	No orthologue	No	C			1
	4930453H23Rik		No orthologue	No	C			1
	H2al1	histone variant H2al1	No orthologue	No	C			13
	1700003E24Rik		No orthologue	No	C			4
	1700010D01Rik		No orthologue	No	C			4
	4933428M09Rik		No orthologue	No	C			1
	4921511M17Rik		No orthologue	No	C			4
	Ppp1r2-psN	protein phosphatase 1, regulatory (inhibitor) subunit 2	No orthologue	No	C			1
	Ssxb1	synovial sarcoma, X member B, breakpoint 1	No orthologue	No	C			13
F8 gene family	F8a	factor VIII-associated (intronic transcript) 1	Eutheria	Group D	—		4	1
FAM122C	Fam122	family with sequence similarity 122, member C	Eutheria	Group A	F		1	1
RLIM	Rlim	ring finger protein, LIM domain interacting	Eutheria	Group A	F		1	1
SATL1	Satl1	spermidine/spermine N1-acetyl transferase-like 1	Eutheria	Group A	F		1	1
CTAG2	Ctag2	cancer/testis antigen 2	Eutheria	Group D	—		3	4
ABCD1	Abcd1	ATP-binding cassette, sub-family D (ALD), member 1	Eutheria	Group D	—		1	1
ACTRT1	Actrt1	actin-related protein T1	Eutheria	N/A	F		1	1
ARL13A	Arl13a	ADP-ribosylation factor-like 13A	Eutheria	N/A	F		1	1
CAPZA1A	4933400A11Rik	capping protein (actin filament) muscle Z-line, alpha 1	Eutheria	N/A	F		1	1
CLDN3A	4930412D23Rik	claudin-3	Eutheria	N/A	F		1	1
TGIF2LX	Tgif2lx1/Tgif2lx2	TGFB-induced factor homeobox 2-like, X-linked 1	Eutheria	N/A	F		1	2
RP2	Rp2h	retinitis pigmentosa 2 homolog	Eutheria	N/A	F		1	1
These genes are in Group C in humans (Current Study), but not in Group C in mice (Namekawa et al. 2006).
Human	Mouse			Expression in Mouse
SYAP1	Syap1	synapse associated protein 1	Eutheria	Group A	F		1	1
FTSJ1	Ftsj1	FtsJ homolog 1 (E. coli)	Eutheria	Group A	F		1	1
IDH3G	Idh3g	isocitrate dehydrogenase 3 (NAD+) gamma	Eutheria	Group A	F		1	1
CITED1	Cited1	Cbp/p300-interacting transactivator with Glu/Asp-rich carboxy-terminal domain 1	Eutheria	Group A	F		1	1
GATA1	Gata1	GATA binding protein 1	Eutheria	Group A	F		1	1
GSPT2	Gspt2	G1 to S phase transition 2	Eutheria	Group A	F		1	1
MBNL3	Mbnl3	muscleblind-like 3 (Drosophila)	Eutheria	Group A	F		1	1
MCTS1	Mcts1	malignant T cell amplified sequence 1	Eutheria	Group A	F		1	1
MID1IP1	Mid1ip1	Mid1 interacting protein 1	Eutheria	Group A	F		1	1
MUM1L1	Mum1l1	melanoma associated antigen (mutated) 1-like 1	Eutheria	Group A	F		1	1
NGFRAP1	Ngfrap1	erve growth factor receptor (TNFRSF16) associated protein 1	Eutheria	Group A	F		1	1
PJA1	Pja1	praja ring finger 1	Eutheria	Group A	F		1	1
SH3BGRL	Sh3bgrl	SH3 domain binding glutamic acid-rich protein like	Eutheria	Group A	F		1	1
TCEAL8	Tceal8	transcription elongation factor A (SII)-like 8	Eutheria	Group A	F		1	1
ZNF275	Zfp275	zinc finger protein 275	Eutheria	Group A	F		1	1
MAOA	Maoa	monoamine oxidase A	Eutheria	Group B	—		1	1
TBC1D25	Tbc1d25	TBC1 domain family, member 25	Eutheria	Group B	—		1	1
G6PD	G6pdx	glucose-6-phosphate dehydrogenase	Eutheria	Group B	—		1	1
CDKL5	Cdkl5	cyclin-dependent kinase-like 5	Eutheria	N/A	F		1	1
PPEF1	Ppef1	protein phosphatase, EF-hand calcium binding domain 1	Eutheria	N/A	F		1	1
CDK16	Cdk16	cyclin-dependent kinase 16	Eutheria	N/A	F		1	1
Cxorf65	Cxorf65	chromosome X open reading frame 65	Eutheria	N/A	F		1	1
FATE1	Fate1N	fetal and adult testis expressed 1	Eutheria	N/A	F		1	1
HMGN5	Hmgn5	high mobility group nucleosome binding domain 5	Eutheria	N/A	F		1	1
LOC100329135	Gm15070	hypothetical LOC100329135	Eutheria	N/A	F		1	1
NR0B1	Nr0b1	nuclear receptor subfamily 0, group B, member 1	Eutheria	N/A	F		1	1
NXF3	Nxf3	nuclear RNA export factor 3	Eutheria	N/A	F		1	1
PCYT1B	Pcyt1b	phosphate cytidylyltransferase 1, choline, beta isoform	Eutheria	N/A	F		1	1
SSR4	Ssr4	signal sequence receptor, delta	Eutheria	N/A	F		1	1
UBA1	Uba1	ubiquitin-like modifier activating enzyme 1	Eutheria	N/A	F		1	1
UBE2DNLN	Ube2dnlN	ubiquitin-conjugating enzyme E2D N-terminal like	Eutheria	N/A	F		1	2
WBP5	Wbp5	WW domain binding protein 5	Eutheria	N/A	F		1	1
TEX28	Tex28	testis expressed 28	Eutheria	N/A	F		~ 4	1
BEX4	Bex4	brain expressed, X-linked 4	Eutheria	N/A	F		1	1
BEX5	Bex4	brain expressed, X-linked 5	Eutheria	N/A	F		1	1
FAM127A	Cxx1 gene family	family with sequence similarity 127, member A	Eutheria	N/A	F		1	3
TCEAL3	Tceal3	transcription elongation factor A (SII)-like 3	Eutheria	N/A	F		1	1
TMEM31	Tmem31	transmembrane protein 31	Elephant	No	D		1
LOC100287728N		hypothetical LOC100287728	Pig	No	D		1
ATXN3L		ataxin 3-like	Sheep/Pig	No	D		1
FAM47B		family with sequence similarity 47, member B	Primates	No	D		1
CXorf51A/CXorf51B		chromosome X open reading frame 51	Primates	No	D		2
HSFX1/HSFX2		heat shock transcription factor family, X linked 1, 2	Primates	No	D		4
FAM104B		family with sequence similarity 104, member B	Primates	No	D		1
KIAA1210		KIAA1210	Primates	No	D		1
SPANXB1/SPANXB2		sperm protein associated with the nucleus, X-linked family, member B	Great apes	No	E		2
SPANXC		sperm protein associated with the nucleus, X-linked family, member C	Great apes	No	E		1
LOC100129407N		hypothetical LOC100129407	Great apes	No	E		3
LOC550643N		hypothetical LOC550643	Great apes	No	E		1
N non coding RNA	A Autosomal gene	N/A Not Assigned
Summary
List	Numbers
A	12
B	20
C	9
D	8
E	4
F	43
Others	8
