# Supplementary material for: Human postmeiotic sex chromatin and its impact on sex chromosome evolution
Source: HighWire-hosted journal article supplement (doi:10.1101/gr.135046.111), 2012-02-28
Supplement: Sin_tableS9.xlsx [file Sin_tableS9.xlsx]

## Sheet: Sheet1
Table S9. List of Ka/Ks values of escape genes and non-escape genes. Escape genes include genes that escape postmeiotic silencing in humans. Non-escape genes include genes consistently repressed by postmeiotic silencing both in humans and in mice.
Escape gene						Suppressed gene during spermatogenesis
Human	Mouse	Ka/Ks	Ka	Ks		Human	Mouse	Ka/Ks	Ka	Ks
AKAP14	LOC434756	0.6787	0.1799	0.2651		AIFM1	Aifm1	0.188	0.0217197	0.1155
AKAP4	Akap4	0.2889	0.05217	0.1806		ATP11C	Atp11c	0.117	0.014694	0.1256
ASB12	Asb12	0.1795	0.0330087	0.1839		ATP6AP2	Atp6ap2	0.0856129	0.0135251	0.158
BEX4	Bex4	0.6525	0.1123	0.1721		BEX2	Bex2	0.2839	0.0542444	0.1911
BEX5	Bex4	0.6656	0.1868	0.2807		CAPN6	Capn6	0.0742755	0.0117816	0.1586
CDK16	Cdk16	0.0480077	0.00602788	0.1256		CASK	Cask	0.00352666	0.00029112	0.0825487
CDKL5	Cdkl5	0.1041	0.0190317	0.1828		CETN2	Cetn2	0.0608786	0.0102068	0.1677
CITED1	Cited1	0.2921	0.0487177	0.1668		CHRDL1	Chrdl1	0.159	0.0205321	0.1291
CXorf27	1700054O13Rik	0.8266	0.2873	0.3475		DKC1	Dkc1	0.144	0.0217237	0.1509
CXorf61	1110059M19Rik	0.6226	0.3242	0.5207		DOCK11	Dock11	0.0607294	0.00907183	0.1494
CXorf65	Gm614	0.6163	0.153	0.2483		EBP	Ebp	0.313	0.065409	0.209
CYLC1	Cylc1	0.984	0.2054	0.2087		FGF13	Fgf13	0.0108047	0.00081792	0.0756999
DUSP21	1700094E07Rik	0.27	0.0920004	0.3407		FUNDC1	Fundc1	0.0518129	0.00693533	0.1339
FATE1	Fate1	Mouse ncRNA				GDI1	Gdi1	0.0234399	0.00379415	0.1619
FAM127A	Cxx1a	0.3177	0.0915518	0.2881		GPC3	Gpc3	0.0985384	0.0135024	0.137
FTSJ1	Ftsj1	0.1766	0.0295501	0.1673		HCCS	Hccs	0.2189	0.0415754	0.1899
G6PD	G6pdx	0.0796948	0.0157013	0.197		IDS	Ids	0.1853	0.0385074	0.2078
GATA1	Gata1	0.179	0.0371677	0.2076		KLHL4	Klhl4	0.1687	0.0257568	0.1527
GSPT2	Gspt2	0.1697	0.0244102	0.1439		LAS1L	Las1l	0.4434	0.0696567	0.1571
H2AFB1	4930557A04Rik	0.4818	0.1705	0.3539		LPAR4	Lpar4	0.0257216	0.00418296	0.1626
HMGN5	Hmgn5	0.4596	0.1137	0.2473		MAGT1	Magt1	0.1844	0.0260353	0.1412
IDH3G	Idh3g	0.064854	0.0128995	0.1989		MCTS1	Mcts1	0.0321154	0.00359416	0.1119
LOC100288814	1700042B14Rik	0.8267	0.2281	0.2759		MPP1	Mpp1	0.117	0.0193788	0.1656
LOC100329135	Gm15070	0.431	0.1046	0.2428		MTMR1	Mtmr1	0.1046	0.0167253	0.1598
LOC728317	EG434797	0.5783	0.0591558	0.1023		NAP1L2	Nap1l2	0.2471	0.0436009	0.1764
MAOA	Maoa	0.1719	0.0342358	0.1991		NHS	Nhs	0.1808	0.0295373	0.1634
MBNL3	Mbnl3	0.3353	0.0327671	0.0977176		NRK	Nrk	0.4831	0.0842167	0.1743
MCTS1	Mcts1	0.0321154	0.0059416	0.1119		NXT2	Nxt2	0.292	0.0274894	0.094152
MID1IP1	Mid1ip1	0.1777	0.025601	0.1441		OGT	Ogt	0.0070701	0.0010235	0.1448
MUM1L1	Mum1l1	0.4287	0.0915128	0.2135		PDHA1	Pdha1	0.023111	0.00511056	0.2211
NGFRAP1	Ngfrap1	0.06764	0.0118381	0.175		PDZD11	Pdzd11	0.0571688	0.00763374	0.1335
NR0B1	Nr0b1	0.5129	0.1071	0.2089		PIR	Pir	0.06874	0.0111504	0.1622
NXF3	Nxf3	0.6749	0.1363	0.2019		PQBP1	Pqbp1	0.1692	0.033085	0.1955
PCYT1B	Pcyt1b	0.0658643	0.010482	0.1591		RAB9B	Rab9b	0.0319393	0.00457168	0.1431
PJA1	Pja1	0.2897	0.0511832	0.1767		RAP2C	Rap2c	0	0	0.103
PPEF1	Ppef1	0.559	0.0819933	0.1467		RBMX2	Rbmx2	0.3063	0.0624511	0.2039
PPP1R2P9	4930403L05Rik	Mouse ncRNA				REPS2	Reps2	0.1872	0.0279938	0.1495
RIBC1	Ribc1	0.4579	0.1084	0.2367		RNF113A	Rnf133a1	0.1741	0.0311855	0.1791
SH3BGRL	Sh3bgrl	0.1068	0.0116309	0.1089		SH3BGRL	Sh3bgrl	0.1068	0.0116309	0.1089
SSR4	Ssr4	0.0476561	0.0119347	0.2504		SLC9A6	Slc9a6	0.0675245	0.00957185	0.1418
SYAP1	Syap1	0.1804	0.0392335	0.2175		SPIN4	Spin4	0.053101	0.0108642	0.2046
TBC1D25	Tbc1d25	0.0819685	0.0146639	0.1789		SRPX2	Srpx2	0.1022	0.01601	0.1567
TCEAL3	Tceal3	0.3704	0.0698194	0.1885		TAB3	Tab3	0.1115	0.011373	0.102
TCEAL8	Tceal8	0.4134	0.0774879	0.1875		TAF9B	Taf9b	0.2332	0.019723	0.0845796
TEX13A	1700025D03Rik	0.6019	0.183	0.304		TBCA	Tbca	0.0950662	0.0189529	0.1994
TEX28	Tex28	0.6427	0.121	0.1883		TMEM35	Tmem35	0.065908	0.00763847	0.1159
TMEM31	Tmem31	Mouse ncRNA				UBL4A	Ubl4a	0.1213	0.0249694	0.2059
UBA1	Uba1	0.0687582	0.0117299	0.1706		WDR13	Wdr13	0.0123804	0.00216685	0.175
UBE2DNL	Ube2dnl	Human/Mouse ncRNA				WDR44	Wdr44	0.1909	0.0220888	0.1157
WBP5	Wbp5	0.364	0.0626289	0.172		XIAP	Xiap	0.2292	0.027385	0.1195
ZCCHC13	Zcchc13	0.5684	0.1426	0.2508	0.2181	ZBTB33	Zbtb33	0.2521	0.0291471	0.1156
ZNF275	Zfp275	0.2181	0.1548	0.0337528		ZMYM3	Zmym3	0.1065	0.0101725	0.0955543
Average		0.363166	0.0871891	0.207729		Average		0.137119	0.0212386	0.149608
