# Supplementary figures and images for: Human postmeiotic sex chromatin and its impact on sex chromosome evolution
Source: HighWire-hosted journal article supplement (doi:10.1101/gr.135046.111), 2012-02-28

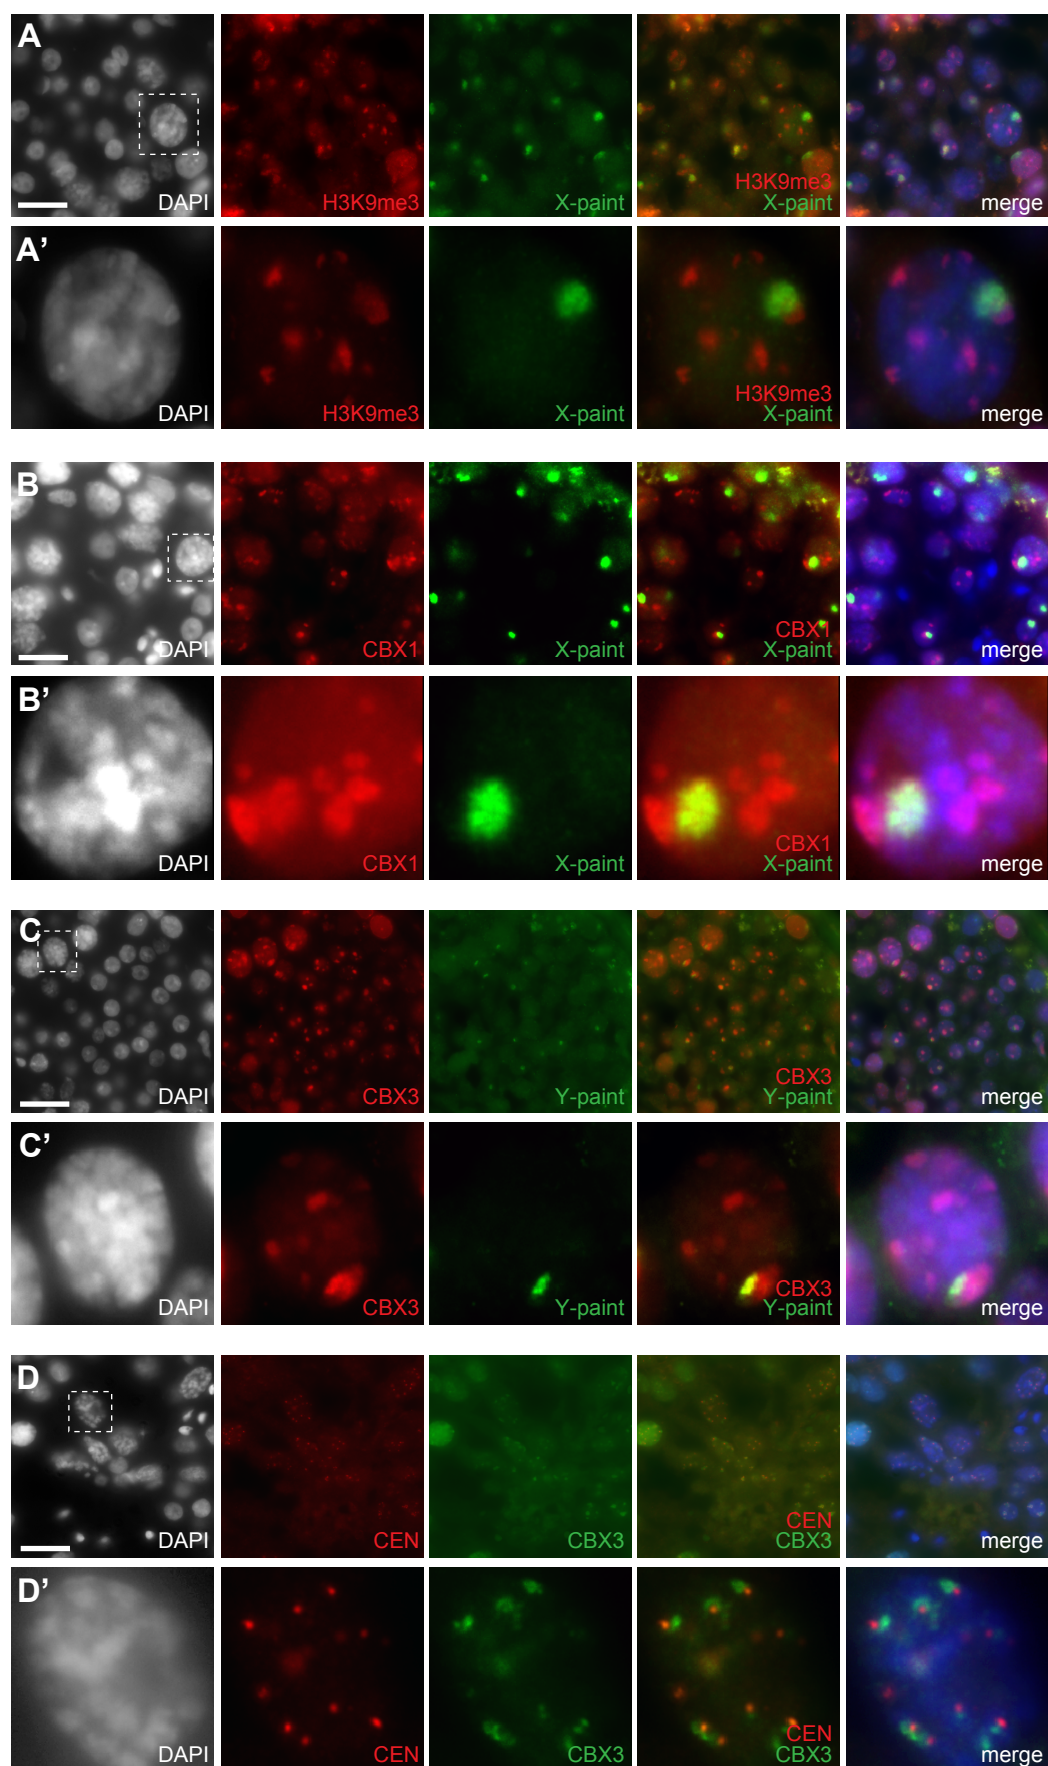

Figure S1 - Sin

Supplement: 022312_FigS1.pdf [file 022312_FigS1.pdf]
